# Supplementary material for: Determinants of vulnerability in early childhood development in Ireland: a cross-sectional study
Source: PubMed Central journal article supplement — BMJ Open. 2013 May 11;3(5):e002387. doi: 10.1136/bmjopen-2012-002387 (PMC3657679; doi:10.1136/bmjopen-2012-002387), 2013-05-11
Supplement: bmjopen-2012-002387.draft_revisions.pdf [file bmjopen-2012-002387.draft_revisions.pdf]

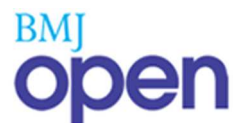

## Determinants of Vulnerability in Early Childhood Development – a Population Level Study

|                                 |                                                                                                                                                                                                                                                                                                               |
|---------------------------------|---------------------------------------------------------------------------------------------------------------------------------------------------------------------------------------------------------------------------------------------------------------------------------------------------------------|
| Journal:                        | <i>BMJ Open</i>                                                                                                                                                                                                                                                                                               |
| Manuscript ID:                  | bmjopen-2012-002387                                                                                                                                                                                                                                                                                           |
| Article Type:                   | Research                                                                                                                                                                                                                                                                                                      |
| Date Submitted by the Author:   | 26-Nov-2012                                                                                                                                                                                                                                                                                                   |
| Complete List of Authors:       | Curtin, Margaret; University College Cork, Epidemiology and Public Health<br>Madden, Jamie; University College Cork, Epidemiology and Public Health<br>Staines, Anthony; Dublin City University, School of Nursing and Human Sciences<br>Perry, Ivan; University College Cork, Epidemiology and Public Health |
| <b>Primary Subject Heading</b>: | Public health                                                                                                                                                                                                                                                                                                 |
| Secondary Subject Heading:      | Epidemiology                                                                                                                                                                                                                                                                                                  |
| Keywords:                       | Community child health < PAEDIATRICS, Child development, Social determinants                                                                                                                                                                                                                                  |
|                                 |                                                                                                                                                                                                                                                                                                               |

SCHOLARONE™  
Manuscripts

# Determinants of Vulnerability in Early Childhood Development – a Population Level Study

<sup>1</sup>Margaret Curtin

<sup>1</sup>Jamie Madden

<sup>2</sup>Anthony Staines

<sup>1</sup>Ivan J. Perry

<sup>1</sup>Department of Epidemiology and Public Health, University College Cork, Ireland

<sup>2</sup>School of Nursing and Human Sciences, Dublin City University, Ireland

Corresponding author: Margaret Curtin

Department of Epidemiology and Public Health,  
Floor 4, Western Gateway Building,  
University College Cork,  
Cork, Ireland.

Telephone: +353 86 3219121

Fax: +353 21 4205469

e-mail: [m.curtin@ucc.ie](mailto:m.curtin@ucc.ie)

**Key words:** Child development; pre-school child; population health; epidemiological measurement

**Word Count:** 2927

**ARTICLE SUMMARY****Article focus**

- This study demonstrates that significant population level variation exists in healthy child development.
- The Early Development Instrument (EDI) is a unique, well-validated population level instrument which allows us to track all five domains of early development and identify populations of children at risk.
- When used in conjunction with a parental questionnaire factors which impact on child development at the child, family and community level can be identified.

**Key Messages**

- A direct population level evidence base on normal child development is needed both as an indicator of child health and a predictor of future outcomes.
- Three child-level demographic factors (age, gender and language) accounted for over half of the population level risk of developmental vulnerability, reinforcing the need for universal early childhood programmes which are cognisant of these variations.

**Strengths and limitations of the study**

- This is the first population level study in Europe assessing child development outcomes across multiple domains using the EDI.
- The study identifies proximal factors associated with child development, yet children and families do not live in a vacuum. Further research is needed to identify associated factors in the broader socio-cultural environment.

**Abstract:**

Objectives: Early childhood development strongly influences life-long health. The Early Development Instrument (EDI) is a well validated population-level measure of five developmental domains (physical, social, emotional, language and cognitive skills, and general knowledge) at school entry age. The aim of this study was to explore the potential of the EDI as an indicator of early development in Ireland. It is the first population level study in Europe measuring child development across multiple domains using the EDI.

Design: A cross-sectional design was used.

Setting: The study was conducted in 42 out of 47 primary schools in a major Irish urban centre.

Participants: EDI (teacher completed) scores were calculated for 1,243 children in their first year of full-time education. Contextual data from a subset of 865 children was collected using a parental questionnaire.

Primary and secondary outcome measures: Children scoring in the lowest 10% of the population in one or more domains were deemed 'developmentally vulnerable'. Scores were correlated with contextual data from the parental questionnaire.

Results: In the sample population 29% of children were not developmentally ready to engage in school. Factors associated with increased risk of vulnerability were being male OR=2.1 (CI =1.6 to 2.7); under 5 years OR = 1.5 (CI = 1.1 to 2.1); and having English as a second language OR = 3.7 (CI = 2.6 to 5.2). Adjusted for these demographics, low birth weight, poor parent/child interaction and mother's lower level of education showed the most significant odds ratios for developmental vulnerability. Calculating Population Attributable Fractions, the greatest population-level risk factors were being male (35%), mother's education (27%) and having English as a second language (12%).

Conclusion: The EDI and linked parental questionnaires are promising indicators of the extent, distribution and determinants of developmental vulnerability among children in their first year of primary school in Ireland.

## BACKGROUND

There is significant epidemiological evidence that early childhood development (from gestation to age six) strongly influences life-long health trajectories<sup>1</sup>. Indeed, major public health problems such as obesity, heart-disease and mental health problems can be seen to have roots in early childhood<sup>2-3</sup>. This results from a complex interplay between genetic makeup, in utero development, and both pre and postnatal environmental factors, all of which influence brain development in the first five years of life<sup>4</sup>.

There is also evidence of a social gradient in child development<sup>5</sup>, with children from poorer backgrounds doing less well in school and entering into an intergenerational cycle of reduced employment opportunities, higher fertility and health inequalities<sup>6</sup>. The long term social and economic gain of investing in the early years is also recognised<sup>7</sup>. Kershaw estimates that the cost of preventable early vulnerability to the Canadian economy is between \$2.2 and \$3.4 trillion<sup>8</sup>.

The challenge for public health, is to give due consideration to early childhood development both as an indicator of child health and as a predictor of future outcomes. Child development has been recognised as a key social determinant (Furumoto-Dawson et al., 2007, Maggi et al., 2010). Moreover, the relatively large numbers of children with less pronounced development delay are a potentially greater burden than a small number of children at high risk<sup>9</sup> leading to a need for a population health approach<sup>10</sup>. Yet, measurement of child development is usually in the form of a diagnostic which aims to identify children at greatest risk and provide appropriate individual care, leaving a dearth of research evidence on which to build population level strategies (Guhn et al., 2007a, Avan and Kirkwood, 2010). In this context a direct population level evidence base on normal child development is needed.

The Early Development Instrument (EDI) is an internationally accepted, validated tool which has the potential to provide such an evidence base<sup>11</sup>. In Australia the EDI (AEDI) has been used universally as a census of child development and has revealed significant variation across states and territories<sup>12</sup>. This is the first population level study in Europe assessing child development outcomes across multiple domains, and using the EDI. The overall objective of the study was to ascertain the proportion of children who were developmentally ready for school in a representative sample of schools in a major urban centre in Ireland using the EDI and to examine associated factors. The study also aimed to assess the feasibility of implementing the EDI and its performance in this setting.

## METHODS

This observational study of child development was implemented with children in their first year of formal education (i.e. Junior Infants) in 42 of the 47 primary schools in Cork city. Five schools in the city declined to take part. A further four schools agreed to participate in the study but chose not to administer the parental questionnaire as they believed it would put undue pressure on parents with literacy challenges.

All eligible children in the participating schools were included. Eligibility criteria were: being in the first year of formal education, being in the class more than one month and not having left the school.

### Measurement of Child Development - The Early Development Instrument

1  
2  
3 Child development at school entry age was measured using the Early Development Instrument (EDI).  
4 This population level measure was designed at the Offord Centre for Child Studies, McMasters  
5 University, Hamilton, Ontario in the late 90s to measure the extent to which children have attained  
6 the physical, social, emotional and cognitive maturity necessary to engage in school activities <sup>13</sup>.  
7 The EDI is a community or population level measure, not an individual screening or diagnostic tool.  
8 The underlying focus is that of a population health approach i.e. small modifications of risk for large  
9 numbers are more effective at producing change than large modifications for small numbers <sup>10</sup>. It  
10 can be retrospective, focusing on early childhood development outcomes; or predictive, informing  
11 school and child-health programmes <sup>13</sup>. The instrument consists of five domains, sixteen sub-  
12 domains and 104 questions. The domains and sub domains are outlined in Table 1.  
13  
14  
15

16 The EDI is a well validated instrument which has had extensive psychometric testing done both in  
17 Canada and Australia (Janus et al., 2007, Janus and Offord, 2007, D'Angiulli et al., 2009, Brinkman et  
18 al., 2007, Janus et al., 2011).  
19

### 20 21 **Parental Questionnaire**

22  
23 In 2003 a parental questionnaire was developed and tested by the Offord Centre to complement the  
24 results of the EDI and provide a deeper population level context to the lives of children. This  
25 questionnaire was adapted to suit the Irish context and consists of seven sections: child health and  
26 development; child care; pre-school; school; family; neighbourhood; and background information.  
27

### 28 29 **Data collection**

30  
31 The EDI is a teacher completed questionnaire based on five months observation of the children from  
32 the date when they start school, and was, therefore, implemented in the latter half of the first year  
33 of formal education. Prior to completing the questionnaires, the teachers were given a short  
34 training and were each issued with an EDI guide book. Children were not present when the  
35 questionnaire was completed and no individual identifiers were recorded. Each child was assigned  
36 a form ID which was used on both the EDI and Parental Questionnaire.  
37

38  
39 The parental questionnaires were administered simultaneously and were distributed in school bags  
40 or homework folders. Each parental pack contained a letter of explanation, questionnaire (again  
41 with no individual identifier) and a blank envelope in which to return the questionnaire sealed to the  
42 school. Parents were reassured that the envelope would not be opened at the school.  
43  
44

### 45 46 **Developmental scoring**

47  
48 EDI scores were calculated for each developmental domain i.e. Physical Health and Well-being;  
49 Social Competence; Emotional Maturity; Language and Cognitive Development; and Communication  
50 Skills and General Knowledge. All questions had a 2 or 3 point Likert type response format (yes, no,  
51 don't know; very true, sometimes or somewhat true, never or not true, don't know). All responses  
52 had a score of 0 to 10 (2 point answers were scored 0 and 10; 3 point answers were scored 0, 5  
53 and 10). 'Don't know' responses were not scored. Domain scores refer to the child's mean score in  
54 that domain - ranging between 0 and 10. Higher scores indicate better results.  
55

56  
57 Children who scored in the lowest 10% of the study population in one or more of the five domains of  
58 the EDI were classed as 'vulnerable'. Those scoring in the lowest 10-25% for one or more domains  
59  
60

1  
2  
3 were deemed 'at risk' and children who scored in the top 75% were 'on track' in that domain. Each  
4 domain was scored separately as children who are vulnerable in one area cannot compensate  
5 through competence in another. All scores were aggregated to the group level.  
6

7  
8 Data from the parental questionnaires was linked to the teacher filled questionnaire using the Form  
9 ID number and the matching was crosschecked using the recorded date of birth and gender.  
10 Questions, again, were constructed in a Likert type response format - yes, no or three to five  
11 response options. Demographic questions on child's date of birth and birth weight were also  
12 included.  
13

### 14 **Explanatory variables**

15  
16 The child's age was calculated from their date of birth and the date on which the form was  
17 completed and reported in years and months. 'Children for whom English is a second language  
18 (ESL)' refers to those reported by the teacher to have a first language other than English. Members  
19 of the Travelling Community were children who were known by school to be part of this Irish ethnic  
20 minority group.  
21

22  
23 'Children identified as special needs' refers to those children who had already been identified as  
24 needing special assistance in the classroom. In Ireland this is defined as having a 'Special Education  
25 Condition' which has been recognised through a standardised assessment process<sup>14</sup>.  
26  
27

28 Parental reported birth weight was used to calculate whether the child had a low birth weight i.e.  
29 less than 2.5kgs. Parental report of birth weight is proven to be adequately accurate to be  
30 acceptable for research purposes<sup>15</sup>.  
31

32  
33 Parents were asked how much time (to the nearest hour) the child spent either watching television,  
34 using the computer or playing video games on a typical school day. This was coded into '1 or less',  
35 'two to three' and '4 or more' hours.  
36

### 37 **Data analysis**

38  
39 SPSS was used to analyse data. Each child's developmental scores were calculated by the Offord  
40 Centre for Child Studies in line with international EDI process. Initial analysis involved a cross-  
41 tabulation of potential risk items from the teacher completed EDI questionnaire (i.e gender, age,  
42 ESL, pre-school attendance and membership of the Travelling Community) against the child's score  
43 in each of the developmental domains.  
44

45  
46 All further analyses reported here were confined to the sub-group of children for whom parental  
47 data was available. Univariate analysis was used to explore factors associated with 'vulnerability' i.e.  
48 being in the lowest 10% of the target population in one or more domain. Factors which proved  
49 significant ( $p < 0.05$ ) were then entered into logistic regression models to predict likelihood of  
50 vulnerability on EDI scores. The first model adjusted for age, gender and ESL. The second model  
51 adjusted for all other factors.  
52

53  
54 Population attributable fractions (PAF) were used to calculate the proportion of risk attributed to  
55 each of the factors in the final regression<sup>16-17</sup>. This was calculated using the 'punaf' command in  
56 STATA 12.  
57  
58  
59  
60

## RESULTS

EDI questionnaires were distributed to teachers of 1366 children. A total of 1243 (92%) were returned completed and valid. Of these, 45% (n=563) were girls. The average age at which children in the study started school was 4 years and 9 months. The youngest was 3 years 11 months and the oldest 6 years and 1 month.

There was considerable diversity in first language with 12.9% of the children reported to have English as a Second Language (ESL) and 36 different languages spoken. Three percent of the children in the study were members of the Traveller Community. The majority of children (76%) were known by the teacher to have attended preschool in the year before commencing full-time education.

In total, 6.6% of children had already been identified as having special needs. The study was conducted in mainstream primary schools and this number does not, therefore, include those children in Cork attending Junior Infants equivalent in special schools, who would tend to be more severely disabled. Parental questionnaires were returned and linked to 865 (63%) valid child questionnaires. The characteristics of the study population varied somewhat between the overall study and those who returned the parental questionnaire. In particular, the proportion of children for whom English was a second language fell from 12.7% in the overall group to 9.8% in those returning parental questionnaires; for children reported as having special needs, the proportions were 6.15 and 5.0 % respectively; and for those reported to be members of the Travelling community, 3.1% and 1.7% respectively. The characteristics of the overall population and those who returned the parental questionnaire are outlined in Table 2.

### Distribution of domain scores (Mean and standard error)

Mean scores varied across the EDI domains. However, particular groups of children consistently scored below the mean in all domains i.e. boys, children who had English as a second language, members of the Traveller Community, children who had not been to pre-school and those who were under four years 10 months at the time of the study. This is outlined in Figure 1 with the vertical axis representing the mean domain score for the study population.

### Vulnerability

The majority of children scored well in each domain, with 71% not showing any vulnerability. However, over one quarter (28.6%) of all children in the study were developmentally vulnerable (i.e. in the lowest 10<sup>th</sup> percentile for one or more domain). In total 12% were vulnerable in one domain, 6% in 2 and only 3% of children were vulnerable in all 5 domains.

### Factors associated with vulnerability

The following analysis is based only the subset of the study population (n=865) on whom parental questionnaires were returned.

Factors associated with developmental vulnerability (outlined in Table 3) were being male (odds ratio [OR] =2.2, 95% confidence interval [CI] = 1.6 – 3.1), ESL (OR = 3.8, CI= 2.4 – 6.1), being under five years of age at the time of the study (OR = 1.6, CI = 1.1 – 2.4) and low birth weight (OR=2.5,



1  
2  
3 CI=1.4 – 4.5). When compared with children whose mothers had a university education those with  
4 only primary education (OR= 2.8, CI = 1.3 - 5.8) or secondary level (OR = 1.7, CI = 1.1 - 2.6) showed  
5 higher levels of vulnerability. Children who were never or seldom told stories in the past week and  
6 those who spent more than four hours watching television or playing video games also showed  
7 significantly increased vulnerability.  
8  
9

### 10 **Logistic Regression**

11  
12 Regression analysis was then used to assess the impact of each variable on the odds of being  
13 vulnerable as outlined in Table 4. The first model controlled for being male, having English as a  
14 second language and being under five years of age at the time of EDI completion, the second also  
15 controlled for all other factors. Children whose birth weight was less than 2.5kg were over twice as  
16 likely to be vulnerable. Mother's education showed a graded effect. When controlled for all other  
17 variables, children who had not been told or read stories in the past week were over five times as  
18 likely to be vulnerable than those who were told stories every day. In the final model, the amount of  
19 time spent watching television became insignificant.  
20  
21

### 22 **Population Attributable Fraction (PAF)**

23  
24 PAF was used to measure the proportion of vulnerability attributed to each of the factors included in  
25 the final regression model (Table 5). Boys were almost three times as likely as girls to be vulnerable  
26 and being male accounted for 35% of the overall vulnerability. English as a second language  
27 accounted for 12%, and mothers education (primary, secondary or diploma) for 27% of vulnerability.  
28 Despite the high risk of vulnerability among children who were not read to (OR 5.3), this only  
29 accounted for 1.7% of the overall vulnerability reflecting its low prevalence in this population.  
30  
31  
32  
33

### 34 **DISCUSSION**

35  
36 This paper explored the extent to which children in a major urban centre in Ireland have attained the  
37 level of child development necessary to engage fully in the education process. The majority of  
38 children in the study had achieved a level of development appropriate for their age. However, a  
39 significant minority of over one quarter (28.6%) were not developmentally ready to engage in, and  
40 thereby benefit fully from school. Factors associated with this level of vulnerability at the child level  
41 were being male, a younger child, having English as a second language and low birth weight. Key  
42 factors at the family level were mothers education, reading stories.  
43  
44

45  
46 The overall level of developmental vulnerability was consistent with findings from urban areas in  
47 Canada where the EDI has been implemented (Carpiano et al., 2009, Kershaw et al., 2010, Janus and  
48 Duku, 2007, Kohen et al., 2009). Hertzman describes this as an unacceptable level of difficulty at  
49 school entry age. Considering the expected level of biological determined developmental delay is 5 -  
50 8 % of any given population, external factors can be seen to contribute to major disparities<sup>18</sup>.  
51

52  
53 The study had identified key factors that are associated with this developmental delay. In the final  
54 model, the strongest predictor of vulnerability on EDI scores was story telling. Children who were  
55 never told stories in the past week were over five times as likely to be vulnerable in one or more  
56 domain when compared with children who were told stories every day. This supports numerous  
57  
58  
59  
60

1  
2  
3 studies which show a link between reading stories and literacy development <sup>19</sup>and with broader  
4 aspects of development <sup>20</sup>.  
5

6 Three child-level demographics were strongly associated with vulnerability. Boys, children who start  
7 school at a younger age and those for whom English is a second language were also more likely to be  
8 vulnerable. PAF illustrates that these three factors account for half of all vulnerability. These  
9 findings are consistent with international studies (Maggi et al., 2010, Janus and Duku, 2007) and  
10 reinforce the need for universal early childhood programmes which are cognisant of these  
11 variations.  
12

13  
14 This paper specifically considers the proximal factors associated with early childhood development.  
15 Yet it is clear that children and families do not live in a vacuum. There are multiple factors in the  
16 broader economic and socio-cultural environment which must be considered <sup>1</sup>.  
17  
18

19 Epidemiological studies have clearly linked early socio-economic circumstances to later outcomes  
20 (Lawlor et al., 2006, Irwin et al., 2007, Ford-Jones et al., 2008). Yet, the specific factors and  
21 processes in the early years which contribute to these outcomes have not been adequately  
22 explored. The reliance on diagnostic instruments which are professionally administered and  
23 measure particular aspects of development has led to gaps in population level studies on early  
24 development outcomes <sup>21</sup>. The EDI is a unique, well-validated, population level instrument which  
25 allows us to track all five domains of early childhood development. It has the potential to enhance  
26 our understanding of the early years environment and identify populations of children at risk of  
27 developmental delay. This in turn can inform universal programmes to enhance outcomes for whole  
28 populations of children.  
29  
30  
31  
32  
33  
34  
35  
36  
37  
38  
39  
40  
41  
42  
43  
44  
45  
46  
47  
48  
49  
50  
51  
52  
53  
54  
55  
56  
57  
58  
59  
60

Table 1: Child development outcomes measured by the EDI

| EDI Domains /Sub-domains                     | Expected behaviour                                                                                                                                                                              |
|----------------------------------------------|-------------------------------------------------------------------------------------------------------------------------------------------------------------------------------------------------|
| <b>PHYSICAL HEALTH &amp; WELL BEING</b>      |                                                                                                                                                                                                 |
| <b>Physical readiness for school day</b>     | Usually dressed appropriately for school and not tired, late or hungry.                                                                                                                         |
| <b>Physical independence</b>                 | Can look after own personal needs appropriately, established hand preference, well coordinated, and do not suck a thumb/finger.                                                                 |
| <b>Gross and fine motor skills</b>           | Physically able to participate in school and excellent or good gross and fine motor skills.                                                                                                     |
| <b>SOCIAL COMPETENCE</b>                     |                                                                                                                                                                                                 |
| <b>Overall social competence</b>             | Very good ability to play and get along with various children, usually cooperative and self-confident.                                                                                          |
| <b>Responsibility and respect</b>            | Respect for others, and for property, follow rules and take care of materials, accept responsibility for actions, and show self-control.                                                        |
| <b>Approaches to learning</b>                | Can work neatly, independently, and solve problems, follow instructions and class routines, easily adjusts to changes.                                                                          |
| <b>Readiness to explore new things</b>       | Curious about the surrounding world, and eager to explore new books, toys and games.                                                                                                            |
| <b>EMOTIONAL MATURITY</b>                    |                                                                                                                                                                                                 |
| <b>Pro-social and helping behaviour</b>      | Helping someone hurt, sick or upset, offering to help spontaneously, invite bystanders to join in.                                                                                              |
| <b>Anxious and fearful behaviour</b>         | Seldom or never showing anxious behaviours; happy and able to enjoy school, comfortable being left at school by caregivers.                                                                     |
| <b>Aggressive behaviour</b>                  | Seldom or never showing aggressive behaviours; not using aggression to solve conflict, not having temper tantrums, and not mean to others.                                                      |
| <b>Hyperactivity and inattention</b>         | Not showing hyperactive behaviours; able to concentrate, attend to chosen activities, wait their turn, and usually think before doing.                                                          |
| <b>LANGUAGE &amp; COGNITIVE</b>              |                                                                                                                                                                                                 |
| <b>Basic literacy skills</b>                 | Have basic literacy skills: can handle a book, identify some letters and attach sounds to some letters, show awareness of rhyming words, know the writing directions, and write their own name. |
| <b>Interest literacy/numeracy and memory</b> | Showing interest in books and reading, math and numbers, and no difficulty remembering things.                                                                                                  |
| <b>Advanced literacy skills</b>              | Can read simple, complex words or sentences, write voluntarily, write simple words or sentences.                                                                                                |
| <b>Basic numeracy skills</b>                 | Can count to 20, recognize shapes and numbers, compare numbers, sort and classify, use one-to-one correspondence, and understand simple time concepts.                                          |
| <b>COMMUNICATION &amp; GENERAL KNOWLEDGE</b> |                                                                                                                                                                                                 |
| <b>Communication and general knowledge</b>   | Can communicate easily and effectively, can participate in story-telling or imaginative play, articulate clearly, show adequate general knowledge, and are proficient in their native language. |

**Table 2: Demographic Characteristics comparing total EDI sample and those for whom a parental questionnaire was returned**

|                                           | Total EDI sample |      | Parental Questionnaire |      |
|-------------------------------------------|------------------|------|------------------------|------|
|                                           | n                | %    | N                      | %    |
| <b>Gender</b>                             |                  |      |                        |      |
| Female                                    | 563              | 45.3 | 402                    | 46.5 |
| Male                                      | 659              | 53.0 | 463                    | 53.5 |
| Missing                                   | 21               | 1.7  |                        |      |
| <b>English as a second language (ESL)</b> |                  |      |                        |      |
| Not ESL                                   | 1072             | 86.2 | 770                    | 89.0 |
| ESL                                       | 158              | 12.7 | 85                     | 9.8  |
| Missing                                   | 13               | 1.0  | 10                     | 1.2  |
| <b>Identified Special Needs</b>           |                  |      |                        |      |
| Not Special Needs                         | 1160             | 93.3 | 821                    | 94.9 |
| Identified Special Needs                  | 82               | 6.6  | 43                     | 5.0  |
| Missing                                   | 1                | .1   | 1                      | .1   |
| <b>Member of the Travelling Community</b> |                  |      |                        |      |
| No                                        | 1196             | 96.2 | 845                    | 97.7 |
| Yes                                       | 39               | 3.1  | 15                     | 1.7  |
| Missing                                   | 8                | .7   | 5                      | .6   |

**Table 3: Factors associated with developmental vulnerability (Univariate analysis)**

|                                             | n(%)     | % vulnerable | OR  | CI           |
|---------------------------------------------|----------|--------------|-----|--------------|
| Male                                        | 463 (54) | 30%          | 2.2 | (1.6 - 3.1)  |
| English as a second language (ESL)          | 85 (10)  | 49%          | 3.8 | (2.4 - 6.1)  |
| Age <5 years                                | 146 (17) | 31%          | 1.6 | (1.1 - 2.4)  |
| Low birth weight (<2500g)                   | 49 (6)   | 41%          | 2.5 | (1.4 - 4.5)  |
| Mother primary education only               | 38 (4)   | 37%          | 2.8 | (1.3 - 5.8)  |
| Mother secondary education only             | 297 (34) | 27%          | 1.7 | (1.1 - 2.6)  |
| Four or more hours screen-time per day      | 128 (15) | 32%          | 2.0 | (1.2 - 3.4)  |
| Never told stories in the past week         | 10 (1)   | 50%          | 4.2 | (1.2 - 14.8) |
| Told stories once or twice in the past week | 82 (9)   | 32%          | 1.9 | (1.2 - 3.3)  |
| No preschool                                | 44 (5)   | 43%          | 2.7 | (1.4 - 5.0)  |

**Table 4: Logistic Regression predicting likelihood of vulnerability on EDI Scores**

|                                   | OR (95% CI)*     | OR (95% CI)**    |
|-----------------------------------|------------------|------------------|
| Male                              | 2.5 (1.8 - 3.6)  | 2.7 (1.8 - 3.9)  |
| ESL                               | 4.3 (2.6 - 6.9)  | 4.5 (2.6 - 7.8)  |
| Age <5 years                      | 1.4 (0.9 - 2.2)  | 1.3 (0.8 - 2.0)  |
| Low Birth Weight                  | 2.6 (1.4 - 4.9)  | 2.6 (1.3 - 5.0)  |
| Mother Education: Primary or less | 3.1 (1.4 - 6.7)  | 2.5 (1.0 - 6.0)  |
| Secondary                         | 2.1 (1.3 - 3.3)  | 2.1 (1.3 - 3.4)  |
| Diploma                           | 1.5 (0.9 - 2.3)  | 1.5 (0.9 - 2.4)  |
| Daily Screen time: 2 to 3 hours   | 1.2 (0.8 - 1.8)  | 1.0 (0.6 - 1.6)  |
| 4 or more hours                   | 1.7 (1.0 - 3.0)  | 1.2 (0.6 - 2.1)  |
| Stories in the past week: Never   | 3.9 (1.0 - 14.3) | 5.3 (1.3 - 21.1) |
| Once or twice                     | 1.7 (1.0 - 2.9)  | 1.4 (0.8 - 2.5)  |
| Many times                        | 1.2 (0.8 - 1.7)  | 1.1 (0.7 - 1.6)  |
| No Pre-school                     | 1.9 (1.0 - 3.8)  | 1.5 (0.7 - 3.1)  |

\* Adjusted for Age, gender and ESL

\*\* Adjusted for all other variables

**Table 5: PAF for vulnerability based on OR adjusted for all other variables**

|                                   | N (%)    | OR (95% CI)**    | PAF (95% CI)        |
|-----------------------------------|----------|------------------|---------------------|
| Under five                        | 146 (17) | 1.3 (0.8 - 2.0)  | 3.0 (-2.8 - 8.5)    |
| Male                              | 463 (54) | 2.7 (1.8 - 3.9)  | 34.6 (21.3 - 45.7)  |
| ESL                               | 85 (10)  | 4.5 (2.6 - 7.8)  | 12.2 (7.3 - 16.8)   |
| Low Birth Weight                  | 49 (6)   | 2.6 (1.3 - 5.0)  | 4.5 (1.0 - 8.0)     |
| Mother Education: Primary or less | 38 (4)   | 2.5 (1.0 - 6.0)  | 2.8 (-0.2 - 5.7)    |
| Secondary                         | 297 (34) | 2.1 (1.3 - 3.4)  | 16.8 (5.9 - 26.5)   |
| Diploma                           | 263 (30) | 1.5 (0.9 - 2.4)  | 7.7 (-1.8 - 16.3)   |
| Daily Screen time: 2 to 3 hours   | 532 (61) | 1.0 (0.6 - 1.6)  | -0.3 (-21.7 - 17.3) |
| 4 or more hours                   | 128 (15) | 1.2 (0.6 - 2.1)  | 1.6 (-5.2 - 7.9)    |
| Stories in the past week: Never   | 10 (1)   | 5.3 (1.3 - 21.1) | 1.7 (0.1 - 3.3)     |
| Once or twice                     | 82 (9)   | 1.4 (0.8 - 2.5)  | 2.6 (-2.1 - 7.0)    |
| Many times                        | 251 (29) | 1.1 (0.7 - 1.6)  | 1.7 (-6.8 - 9.5)    |
| No Pre-school                     | 44 (5)   | 1.5 (0.7 - 3.1)  | 1.8 (-1.6 - 5.1)    |
| <b>Total PAF</b>                  |          |                  | <b>90.7</b>         |

\*\* Adjusted for all other variables

**Funding:** This work was supported by the Health Research Board in Ireland under grant number PHD/2007/16

**Ethical approval** for this study was obtained from the Clinical Research Ethics Committee of the Cork Teaching Hospitals, Cork, Ireland.

## REFERENCES

1. Kershaw P, Forer B. Selection of area-level variables from administrative data: an intersectional approach to the study of place and child development. *Health Place* 2010;16(3):500-11.
2. Marmot M, Allen J, Goldblatt P, Boyce T, et al. 'Fair Society Health Lives', The Marmot Review. Strategic Review of Health Inequalities in England post 2010. London, 2010.
3. Power C, Elliott J. Cohort profile: 1958 British birth cohort (National Child Development Study). *International Journal of Epidemiology* 2006;35(1):34-41.
4. Lemelin J-P, Boivin M, Forget-Dubois N, et al. The Genetic–Environmental Etiology of Cognitive School Readiness and Later Academic Achievement in Early Childhood. *Child Development* 2007;78(6):1855-69.
5. Nicholson JM, Lucas N, Berthelsen D, Wake M. Socioeconomic inequality profiles in physical and developmental health from 0-7 years: Australian National Study. *Journal of Epidemiology & Community Health* 2012;66(1):81-87.
6. Leventhal T, Brooks-Gunn J. The Neighborhoods They Live in: The Effects of Neighborhood Residence on Child and Adolescent Outcomes. *Psychological Review* 2000;126(2):309-37.
7. Heckman JJ, Masterov DV. The Productivity Argument for Investing in Young Children. *Applied Economic Perspectives and Policy* 2007;29(3):446-93.
8. Kershaw P, Warburton B, Anderson L, et al. The economic costs of early vulnerability in Canada. *Can J Public Health* 2010;101 Suppl 3:S8-12.
9. Guhn M, Janus M, Hertzman C. The Early Development Instrument: Translating school readiness assessment into community actions and policy planning. *Early Education and Development* 2007;18(3):369-74.
10. Rose G. Sick Individuals and Sick Populations. *International Journal of Epidemiology* 1985;14:32 - 38.
11. Janus M, Brinkman S, Duku E. Validity and Psychometric Properties of the Early Development Instrument in Canada, Australia, United States, and Jamaica. *Social Indicators Research* 2011;103(2):283-97.
12. Brinkman SA, Gialamas A, Rahman A, et al. Jurisdictional, socioeconomic and gender inequalities in child health and development: analysis of a national census of 5-year-olds in Australia. *BMJ Open* 2012;2(5).
13. Janus M, Brinkman S, Duku E, et al. The Early Development Instrument: A Population-based Measure for Communities. Hamilton, Ontario: Offord Centre for Child Studies, McMaster University, 2007.
14. Carey DJ. *The Essential Guide to Special Education in Ireland*. Dublin: Primary ABC, 2005.
15. O'Sullivan JJ, Pearce MS, Parker L. Parental recall of birth weight: how accurate is it? *Archives of Disease in Childhood* 2000;82(3):202-03.
16. Hanley JA. A heuristic approach to the formulas for population attributable fraction. *Journal of Epidemiology and Community Health* 2001;55(7):508-14.
17. Miettinen OS. Proportion of disease caused or prevented by a given exposure, trait or intervention. *American Journal of Epidemiology* 1974(99):325 - 32.
18. Hertzman C. The state of child development in Canada: Are we moving toward, or away from, equity from the start? *Paediatr Child Health* 2009;14(10):673-6.

- 1
- 2
- 3 19. Bus AG, Van Ijzendoorn MH. Mothers Reading to Their 3-Year-Olds: The Role of Mother-Child
- 4 Attachment Security in Becoming Literate. *Reading Research Quarterly* 1995;30(4):998-1015.
- 5 20. Fletcher KL, Reese E. Picture book reading with young children: A conceptual framework.
- 6 *Developmental Review* 2005;25(1):64-103.
- 7 21. Janus M, Offord DR. Development and Psychometric Properties of the Early Development
- 8 Instrument (EDI): A Measure of Children's School Readiness. *Canadian Journal of Behavioural*
- 9 *Science-Revue Canadienne Des Sciences Du Comportement* 2007;39(1):1-22.
- 10
- 11
- 12
- 13
- 14
- 15
- 16
- 17
- 18
- 19
- 20
- 21
- 22
- 23
- 24
- 25
- 26
- 27
- 28
- 29
- 30
- 31
- 32
- 33
- 34
- 35
- 36
- 37
- 38
- 39
- 40
- 41
- 42
- 43
- 44
- 45
- 46
- 47
- 48
- 49
- 50
- 51
- 52
- 53
- 54
- 55
- 56
- 57
- 58
- 59
- 60

For peer review only

1  
2  
3  
4  
5  
6  
7  
8  
9  
10  
11  
12  
13  
14  
15  
16  
17  
18  
19  
20  
21  
22  
23  
24  
25  
26  
27  
28  
29  
30  
31  
32  
33  
34  
35  
36  
37  
38  
39  
40  
41  
42  
43  
44  
45  
46  
47  
48  
49  
50  
51  
52  
53  
54  
55  
56  
57  
58  
59  
60

Figure 1: Distribution of scores across all five domains of development

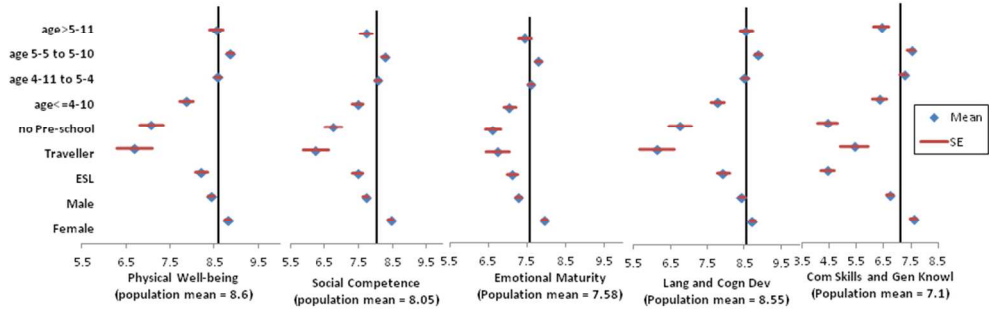

\*Each vertical axis represents the population mean for that domain

254x119mm (96 x 96 DPI)

er review only



STROBE 2007 (v4) Statement—Checklist of items that should be included in reports of *cross-sectional studies*

| Section/Topic                | Item # | Recommendation                                                                                                                                                                       | Reported on page # |
|------------------------------|--------|--------------------------------------------------------------------------------------------------------------------------------------------------------------------------------------|--------------------|
| Title and abstract           | 1      | (a) Indicate the study's design with a commonly used term in the title or the abstract                                                                                               | 1                  |
|                              |        | (b) Provide in the abstract an informative and balanced summary of what was done and what was found                                                                                  | 1                  |
| <b>Introduction</b>          |        |                                                                                                                                                                                      |                    |
| Background/rationale         | 2      | Explain the scientific background and rationale for the investigation being reported                                                                                                 | 1                  |
| Objectives                   | 3      | State specific objectives, including any prespecified hypotheses                                                                                                                     | 1                  |
| <b>Methods</b>               |        |                                                                                                                                                                                      |                    |
| Study design                 | 4      | Present key elements of study design early in the paper                                                                                                                              | 2                  |
| Setting                      | 5      | Describe the setting, locations, and relevant dates, including periods of recruitment, exposure, follow-up, and data collection                                                      | 1                  |
| Participants                 | 6      | (a) Give the eligibility criteria, and the sources and methods of selection of participants                                                                                          | 2                  |
| Variables                    | 7      | Clearly define all outcomes, exposures, predictors, potential confounders, and effect modifiers. Give diagnostic criteria, if applicable                                             | 2–3                |
| Data sources/<br>measurement | 8*     | For each variable of interest, give sources of data and details of methods of assessment (measurement). Describe comparability of assessment methods if there is more than one group | 2–3                |
| Bias                         | 9      | Describe any efforts to address potential sources of bias                                                                                                                            | 3–4                |
| Study size                   | 10     | Explain how the study size was arrived at                                                                                                                                            | 2                  |
| Quantitative variables       | 11     | Explain how quantitative variables were handled in the analyses. If applicable, describe which groupings were chosen and why                                                         | 3                  |
| Statistical methods          | 12     | (a) Describe all statistical methods, including those used to control for confounding                                                                                                | 3                  |
|                              |        | (b) Describe any methods used to examine subgroups and interactions                                                                                                                  | 3–4                |
|                              |        | (c) Explain how missing data were addressed                                                                                                                                          | 3                  |
|                              |        | (d) If applicable, describe analytical methods taking account of sampling strategy                                                                                                   | n/a                |
|                              |        | (e) Describe any sensitivity analyses                                                                                                                                                | n/a                |
| <b>Results</b>               |        |                                                                                                                                                                                      |                    |

|                          |     |                                                                                                                                                                                                              |              |
|--------------------------|-----|--------------------------------------------------------------------------------------------------------------------------------------------------------------------------------------------------------------|--------------|
| Participants             | 13* | (a) Report numbers of individuals at each stage of study—eg numbers potentially eligible, examined for eligibility, confirmed eligible, included in the study, completing follow-up, and analysed            | 1-2          |
|                          |     | (b) Give reasons for non-participation at each stage                                                                                                                                                         | 2            |
|                          |     | (c) Consider use of a flow diagram                                                                                                                                                                           | n/a          |
| Descriptive data         | 14* | (a) Give characteristics of study participants (eg demographic, clinical, social) and information on exposures and potential confounders                                                                     | 2            |
|                          |     | (b) Indicate number of participants with missing data for each variable of interest                                                                                                                          | Tables       |
| Outcome data             | 15* | Report numbers of outcome events or summary measures                                                                                                                                                         | 3-4          |
| Main results             | 16  | (a) Give unadjusted estimates and, if applicable, confounder-adjusted estimates and their precision (eg, 95% confidence interval). Make clear which confounders were adjusted for and why they were included | 4 and tables |
|                          |     | (b) Report category boundaries when continuous variables were categorized                                                                                                                                    | 3 and tables |
|                          |     | (c) If relevant, consider translating estimates of relative risk into absolute risk for a meaningful time period                                                                                             | n/a          |
| Other analyses           | 17  | Report other analyses done—eg analyses of subgroups and interactions, and sensitivity analyses                                                                                                               | 4-5          |
| <b>Discussion</b>        |     |                                                                                                                                                                                                              |              |
| Key results              | 18  | Summarise key results with reference to study objectives                                                                                                                                                     | 5-6          |
| Limitations              | 19  | Discuss limitations of the study, taking into account sources of potential bias or imprecision. Discuss both direction and magnitude of any potential bias                                                   | 5-6          |
| Interpretation           | 20  | Give a cautious overall interpretation of results considering objectives, limitations, multiplicity of analyses, results from similar studies, and other relevant evidence                                   | 6            |
| Generalisability         | 21  | Discuss the generalisability (external validity) of the study results                                                                                                                                        | 6            |
| <b>Other information</b> |     |                                                                                                                                                                                                              |              |
| Funding                  | 22  | Give the source of funding and the role of the funders for the present study and, if applicable, for the original study on which the present article is based                                                | 1            |

\*Give information separately for cases and controls in case-control studies and, if applicable, for exposed and unexposed groups in cohort and cross-sectional studies.

**Note:** An Explanation and Elaboration article discusses each checklist item and gives methodological background and published examples of transparent reporting. The STROBE checklist is best used in conjunction with this article (freely available on the Web sites of PLoS Medicine at <http://www.plosmedicine.org/>, Annals of Internal Medicine at <http://www.annals.org/>, and Epidemiology at <http://www.epidem.com/>). Information on the STROBE Initiative is available at [www.strobe-statement.org](http://www.strobe-statement.org).

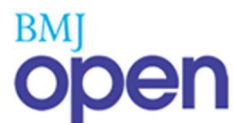

**Determinants of Vulnerability in Early Childhood Development in Ireland – a Population Level Study**

|                                 |                                                                                                                                                                                                                                                                                                               |
|---------------------------------|---------------------------------------------------------------------------------------------------------------------------------------------------------------------------------------------------------------------------------------------------------------------------------------------------------------|
| Journal:                        | <i>BMJ Open</i>                                                                                                                                                                                                                                                                                               |
| Manuscript ID:                  | bmjopen-2012-002387.R1                                                                                                                                                                                                                                                                                        |
| Article Type:                   | Research                                                                                                                                                                                                                                                                                                      |
| Date Submitted by the Author:   | 18-Feb-2013                                                                                                                                                                                                                                                                                                   |
| Complete List of Authors:       | Curtin, Margaret; University College Cork, Epidemiology and Public Health<br>Madden, Jamie; University College Cork, Epidemiology and Public Health<br>Staines, Anthony; Dublin City University, School of Nursing and Human Sciences<br>Perry, Ivan; University College Cork, Epidemiology and Public Health |
| <b>Primary Subject Heading</b>: | Public health                                                                                                                                                                                                                                                                                                 |
| Secondary Subject Heading:      | Epidemiology                                                                                                                                                                                                                                                                                                  |
| Keywords:                       | Community child health < PAEDIATRICS, Child development, Social determinants                                                                                                                                                                                                                                  |
|                                 |                                                                                                                                                                                                                                                                                                               |

SCHOLARONE™  
Manuscripts

# Determinants of Vulnerability in Early Childhood Development in Ireland – a Population Level Study

<sup>1</sup>Margaret Curtin

<sup>1</sup>Jamie Madden

<sup>2</sup>Anthony Staines

<sup>1</sup>Ivan J. Perry

<sup>1</sup>Department of Epidemiology and Public Health, University College Cork, Ireland

<sup>2</sup>School of Nursing and Human Sciences, Dublin City University, Ireland

Corresponding author: Margaret Curtin

Department of Epidemiology and Public Health,  
Floor 4, Western Gateway Building,  
University College Cork,  
Cork, Ireland.

Telephone: +353 86 3219121

Fax: +353 21 4205469

e-mail: [m.curtin@ucc.ie](mailto:m.curtin@ucc.ie)

**Key words:** Child development; pre-school child; population health; epidemiological measurement

**Word Count:** 3998

**ARTICLE SUMMARY****Article focus**

- This study demonstrates that significant population level variation exists in healthy child development in Ireland.
- The Early Development Instrument (EDI) is a unique, well-validated population level instrument which allows us to track all five domains of early development and identify populations of children at risk.
- When used in conjunction with a parental questionnaire factors which impact on child development at the child and family level can be identified.

**Key Messages**

- A direct population level evidence base on normal child development is needed both as an indicator of child health and a predictor of future outcomes.
- Three child-level demographic factors (age, gender and language) accounted for over half of the population level risk of developmental vulnerability, reinforcing the need for universal early childhood programmes which are cognisant of these variations.

**Strengths and limitations of the study**

- This is the first population level study in Europe assessing child development outcomes across multiple domain using the EDI>
- The study identifies proximal factors associated with child development, yet children and families do not live in a vacuum. Further research is needed to identify associated factors in the broader socio-cultural environment.

## BACKGROUND

There is significant epidemiological evidence that early childhood development (from gestation to age six) strongly influences life-long health trajectories<sup>1</sup>. Indeed, major public health problems such as obesity, heart-disease and mental health problems can be seen to have roots in early childhood<sup>2-3</sup>. This results from a complex interplay between genetic makeup, in utero development, and both pre and postnatal environmental factors, all of which influence brain development in the first five years of life<sup>4</sup>.

There is also evidence of a social gradient in child development<sup>5</sup>, with children from poorer backgrounds doing less well in school and entering into an intergenerational cycle of reduced employment opportunities, higher fertility and health inequalities<sup>6</sup>. The long term social and economic gain of investing in the early years is also recognised<sup>7</sup>. Kershaw estimates that the cost of preventable early childhood vulnerability to the Canadian economy is between \$2.2 and \$3.4 trillion<sup>8</sup>.

The challenge for public health, is to give due consideration to early childhood development both as an indicator of child health and as a predictor of future outcomes. Child development has been recognised as a key social determinant (Furumoto-Dawson et al., 2007, Maggi et al., 2010). Moreover, the relatively large numbers of children with less pronounced development delay are a potentially greater burden than a small number of children at high risk<sup>9</sup> leading to a need for a population health approach<sup>10</sup>. Yet, measurement of child development is usually in the form of a diagnostic which aims to identify children at greatest risk and provide appropriate individual care, leaving a dearth of research evidence on which to build population level strategies (Guhn et al., 2007a, Avan and Kirkwood, 2010). In this context a direct population level evidence base on normal child development is needed.

The Early Development Instrument (EDI) is an internationally accepted, validated tool which has the potential to provide such an evidence base<sup>11</sup>. In Australia the EDI (AEDI) has been used universally as a census of child development and has revealed significant variation across states and territories<sup>12</sup>. This is the first population level study in Europe assessing child development outcomes across multiple domains, and using the EDI and linked parental questionnaire. The overall objective of the study was to ascertain the proportion of children who were developmentally ready for school in a representative sample of schools in a major urban centre in Ireland using the EDI and to examine associated factors. The study also aimed to assess the feasibility of implementing the EDI and its performance in this setting.

Ireland is a largely homogenous country with 85.8% of the population ethnically White Irish and a further 9.3% of other white ethnic background, primarily British<sup>13</sup>. Cork is one of five major urban centres. While all of these centres are comprised of areas of concentrated affluence and disadvantage, there are similar overall rates of key socio-economic indicators including unemployment, lone-parent families and education<sup>14</sup>. There is a total population of 64,937 five year olds. A minority ( 1.1%) of Irish children are members of the Traveller Community. Moreover, 19.5% are considered at risk of poverty and 8% live in consistent poverty<sup>15</sup>. The education system is static throughout the country.

## METHODS

1  
2  
3 This observational study of child development was implemented with children in their first year of  
4 formal education ( in Ireland this is referred to as 'Junior Infants') in 42 of the 47 primary schools in  
5 Cork city. Five schools in the city declined to take part. These declining schools were representative  
6 of a cross-section of schools in Cork - one boys school, one girls school, one large mixed, middle  
7 income school, one designated disadvantaged school and one Irish speaking school – and their  
8 omission would not have affected the demographic composition of the study. A further four schools  
9 agreed to participate in the study but chose not to administer the parental questionnaire as they  
10 believed it would put undue pressure on parents with literacy challenges. These were all designated  
11 disadvantaged schools and this has contributed to the under-representation of the most vulnerable  
12 children in the parental study.  
13  
14

15  
16 All eligible children in the participating schools were invited to be included in the study.. Eligibility  
17 criteria were: being in the latter half of the first year of formal education (i.e. having completed A  
18 minimum of 4 to 5 months of education), being known by the teacher for more than one month and  
19 not having left the school.  
20  
21

### 22 **Measurement of Child Development - The Early Development Instrument**

23  
24 Child development at school entry age was measured using the Early Development Instrument (EDI).  
25 This population level measure was designed at the Offord Centre for Child Studies, McMaster  
26 University, Hamilton, Ontario in the late 90s to measure the extent to which children have attained  
27 the physical, social, emotional and cognitive maturity necessary to engage in school activities <sup>16</sup>.  
28 The EDI is a community or population level measure, not an individual screening or diagnostic tool.  
29 The underlying focus is that of a population health approach i.e. small modifications of risk for large  
30 numbers are more effective at producing change than large modifications for small numbers <sup>10</sup>. It  
31 can be retrospective, focusing on early childhood development outcomes; or predictive, informing  
32 school and child-health programmes <sup>16</sup>. The instrument consists of five domains, sixteen sub-  
33 domains and 104 questions. The domains and sub domains are outlined in Table 1.  
34  
35  
36

37 The EDI is a well validated instrument which has had extensive psychometric testing done both in  
38 Canada and Australia <sup>11 16-19</sup>. It has also been proven valid for use in minority populations <sup>20</sup>. In this  
39 Irish study, the EDI had good internally consistency with Cronbach alphas of between 0.8 and 0.96.  
40  
41

### 42 **Parental Questionnaire**

43  
44 In 2003 a parental questionnaire was developed and tested by the Offord Centre to complement the  
45 results of the EDI and provide a deeper population level context to the lives of children <sup>16</sup>. This  
46 questionnaire was adapted to suit the Irish context incorporating validated questions from the  
47 Growing Up in Ireland Study <sup>21</sup> and the SLAN Survey of Lifestyles, Behaviour and Nutrition in Ireland  
48 <sup>22</sup>. It consists of seven sections: child health and development; child care; pre-school; school; family;  
49 neighbourhood; and background information.  
50  
51

### 52 **Data collection**

53  
54 The EDI is a teacher completed questionnaire based on five months observation of the children from  
55 the date when they start school, and was, therefore, implemented in the latter half of the first year  
56 of formal education. Prior to completing the questionnaires, the teachers were given a short  
57 training and were each issued with an EDI guide book. Children were not present when the  
58  
59  
60

questionnaire was completed and no individual identifiers were recorded. Each child was assigned a form ID which was used on both the EDI and Parental Questionnaire.

Passive consent was used in line with previous EDI studies in Canada. An information letter was distributed to all parents by the class teacher two weeks before commencing the study. Parents were given detailed information on the study and asked to contact the school if they did not want their child included. A total of seven parents opted not to participate. Ethical approval was granted by the Clinical Research Ethics Committee of the Cork Teaching Hospitals.

The parental questionnaires were distributed in school bags or homework folders. Each parental pack contained a letter of explanation, questionnaire (again with no individual identifier) and a blank envelope in which to return the questionnaire sealed to the school. Parents were reassured that the envelope would not be opened at the school.

### **Developmental scoring**

EDI scores were calculated for each developmental domain i.e. Physical Health and Well-being; Social Competence; Emotional Maturity; Language and Cognitive Development; and Communication Skills and General Knowledge. All questions had a 2 or 3 point Likert type response format (yes, no, don't know; very true, sometimes or somewhat true, never or not true, don't know). All responses had a score of 0 to 10 (2 point answers were scored 0 and 10; 3 point answers were scored 0, 5 and 10). 'Don't know' responses were not scored. Domain scores refer to the child's mean score in that domain - ranging between 0 and 10. Higher scores indicate better results.

Children who scored in the lowest 10% of the study population in one or more of the five domains of the EDI were classed as 'vulnerable'. The 10% cut off is recommended because it is higher than typical clinical cut-off's and should therefore include children who may be more difficult to diagnose<sup>23</sup>. Those scoring in the lowest 10-25% for one or more domains were deemed 'at risk' and children who scored in the top 75% were 'on track' in that domain. Each domain was scored separately as children who are vulnerable in one area cannot compensate through competence in another. All scores were aggregated to the group level. In the absence of an Irish normative sample, to ensure the validity of the cut-off points, data was also scored against Canadian normative data. There was a 99% correlation between 'vulnerability' using the Irish and Canadian cut-off points. In four of the five domains there was 100% correlation between vulnerability using the Irish and Canadian cut-off points.

Data from the parental questionnaires was linked to the teacher filled questionnaire using the Form ID number and the matching was crosschecked using the recorded date of birth and gender. Questions, again, were constructed in a Likert type response format - yes, no or three to five response options. Demographic questions on child's date of birth and birth weight were also included.

### **Explanatory variables**

The child's age was calculated from their date of birth and the date on which the form was completed and reported in years and months. 'Children for whom English is a second language (ESL)' refers to those reported by the teacher to have a first language other than English. Members



1  
2  
3 of the Travelling Community were children who were known by school to be part of this Irish ethnic  
4 minority group.

5  
6 'Children identified as special needs' refers to those children who had already been identified as  
7 needing special assistance in the classroom. In Ireland this is defined as having a 'Special Education  
8 Condition' which has been recognised through a standardised assessment process<sup>24</sup>.

9  
10 Parental reported birth weight was used to calculate whether the child had a low birth weight i.e.  
11 less than 2.5kgs. Parental report of birth weight has been proven to be adequately accurate to be  
12 acceptable for research purposes<sup>25</sup>.

13  
14 Parents were asked how much time (to the nearest hour) the child spent either watching television,  
15 using the computer or playing video games on a typical school day. This was coded into '1 or less',  
16 'two to three' and '4 or more' hours.

### 17 18 19 **Data analysis**

20  
21 SPSS was used to analyse data. Each child's EDI scores were calculated by the Offord Centre for  
22 Child Studies in line with international EDI process. Initial analysis involved a cross-tabulation of  
23 potential risk items from the teacher completed EDI questionnaire (i.e. gender, age, ESL, pre-school  
24 attendance and membership of the Travelling Community) against the child's score in each of the  
25 developmental domains.  
26  
27

28  
29 All further analyses reported here were confined to the sub-group of children for whom parental  
30 data was available. Univariate analysis was used to explore factors associated with 'vulnerability' i.e.  
31 being in the lowest 10% of the target population in one or more domain. Factors which proved  
32 significant ( $p < 0.05$ ) were then entered into logistic regression models to predict likelihood of  
33 vulnerability on EDI scores. The first model adjusted for age, gender and ESL. The second model  
34 adjusted for all other factors.  
35  
36

37  
38 Population attributable fractions (PAF) were used to calculate the proportion of risk attributed to  
39 each of the factors in the final regression<sup>26-27</sup>. This was calculated using the 'punaf' command in  
40 STATA 12 which calculates confidence intervals for PAF, and also for scenario means and their ratio,  
41 known as the population unattributable fraction. Punaf uses the method for estimating PAFs  
42 recommended by Greenland and Drescher (1993) for cohort and cross-sectional studies<sup>28</sup>.  
43  
44  
45

### 46 47 **RESULTS**

48  
49 EDI questionnaires were distributed to teachers of 1366 children. A total of 1243 (92%) were  
50 returned completed and valid. Of these, 45% (n=563) were girls. The average age at which children  
51 in the study started school was 4 years and 9 months. The youngest was 3 years 11 months and the  
52 oldest 6 years and 1 month.  
53

54  
55 There was considerable diversity in first language with 12.9% of the children reported to have  
56 English as a Second Language (ESL) and 36 different languages spoken. Three percent of the children  
57 in the study were members of the Traveller Community. The majority of children (76%) were known  
58 by the teacher to have attended preschool in the year before commencing full-time education.  
59  
60

1  
2  
3 In total, 6.6% of children had already been identified as having special needs. The study was  
4 conducted in mainstream primary schools and this number does not, therefore, include those  
5 children in Cork attending Junior Infants equivalent in special schools, who would tend to be more  
6 severely disabled.  
7

8  
9 Parental questionnaires were returned and linked to 865 (63%) valid child questionnaires. The  
10 characteristics of the study population varied somewhat between the overall study and  
11 those who returned the parental questionnaire. In particular, the proportion of children for  
12 whom English was a second language fell from 12.7% in the overall group to 9.8% in those  
13 returning parental questionnaires; for children reported as having special needs, the  
14 proportions were 6.15 and 5.0 % respectively; and for those reported to be members of the  
15 Travelling community, 3.1% and 1.7% respectively. The characteristics of the population who  
16 returned the parental questionnaire and those who did not are compared in Table 2.  
17  
18  
19

### 20 **Distribution of domain scores (Mean and standard error)**

21  
22 Mean scores varied across the EDI domains. However, particular groups of children consistently  
23 scored below the mean in all domains i.e. boys, children who had English as a second language,  
24 members of the Traveller Community, children who had not been to pre-school and those who were  
25 under four years 10 months at the time of the study. This is outlined in Figure 1 with the vertical axis  
26 representing the mean domain score for the study population.  
27  
28  
29

### 30 **Factors associated with vulnerability**

31  
32 Over one quarter (28.6%) of children in the study were developmentally vulnerable (i.e. in the  
33 lowest 10<sup>th</sup> percentile for one or more domains). In total 12% were vulnerable in only one domain,  
34 6% in 2 domains, 5% in 3 domains, 3% in 4 domains and 3% were vulnerable in all 5 domains.  
35  
36  
37

38 The following analysis is based only the subset of the study population (n=865) on whom parental  
39 questionnaires were returned.  
40

41 Factors associated with developmental vulnerability (outlined in Table 3) were being male (odds  
42 ratio [OR] =2.2, 95% confidence interval [CI] = 1.6 – 3.1), ESL (OR = 3.8, CI= 2.4 – 6.1), being under  
43 five years of age at the time of the study (OR = 1.6, CI = 1.1 – 2.4) and low birth weight (OR=2.5,  
44 CI=1.4 – 4.5). When compared with children whose mothers had a university education those with  
45 only primary education (OR= 2.8, CI = 1.3 - 5.8) or secondary level (OR = 1.7, CI = 1.1 - 2.6) showed  
46 higher levels of vulnerability. Children who were never or seldom told stories in the past week and  
47 those who spent more than four hours watching television or playing video games also showed  
48 significantly increased vulnerability.  
49  
50  
51

### 52 **Logistic Regression**

53  
54 Regression analysis was then used to assess the impact of each variable on the odds of being  
55 vulnerable as outlined in Table 4. The first model controlled for being male, having English as a  
56 second language and being under five years of age at the time of EDI completion, the second also  
57 controlled for all other factors. Children whose birth weight was less than 2.5kg were over twice as  
58  
59  
60

likely to be vulnerable. Mother's education showed a graded effect. When controlled for all other variables, children who had not been told or read stories in the past week were over five times as likely to be vulnerable than those who were told stories every day. In the final model, the amount of time spent watching television became insignificant.

### Population Attributable Fraction (PAF)

PAF was used to measure the proportion of vulnerability attributed to each of the factors included in the final regression model (Table 5). Boys were almost three times as likely as girls to be vulnerable and being male accounted for 35% of the overall vulnerability. English as a second language accounted for 12%, and mothers education (primary, secondary or diploma) for 27% of vulnerability. Despite the high risk of vulnerability among children who were not read to (OR 5.3), this only accounted for 1.7% of the overall vulnerability reflecting its low prevalence in this population.

### DISCUSSION

This paper explored the extent to which children in a major urban centre in Ireland have attained the level of child development necessary to engage fully in the education process. The findings suggest that, as expected, a significant minority of over one quarter (28.6%) of children in the study were not developmentally ready to engage in, and thereby benefit fully from school. Clearly these findings should be interpreted cautiously in light of the current level of development of the EDI in Ireland, in particular, the lack of data on predictive validity for the EDI in the Irish population. At the same time, the fundamental issue is not the absolute scores but the unacceptable variation in scores related to socio-economic, environmental and ecological circumstances.

The overall level of developmental vulnerability was consistent with findings from urban areas in Canada where the EDI has been implemented<sup>1 29-31</sup> (Carpiano et al., 2009, Kershaw et al., 2010, Janus and Duku, 2007, Kohen et al., 2009). Indeed mean scores across all domains in the Irish sample were similar to those in the Canadian normative sample. Factors associated with increased risk of vulnerability at the child level were being male, a younger child, having English as a second language and low birth weight. Key factors at the family level were mothers education and reading stories. In the final model, the strongest predictor of vulnerability on EDI scores was story telling. Children who were never told stories in the past week were over five times as likely to be vulnerable compared with children who were told stories every day. This supports numerous studies which show a link between reading stories and literacy development<sup>32</sup> and with broader aspects of development<sup>33</sup>. These are again consistent with findings from Canada, further supporting the transferability of the instrument between the two jurisdictions<sup>34</sup>.

The mean scores across all five domains varied between sub-groups of the population. The impact of age is very clear. Younger children, aged less than 4 years and 10 months scored on average less well across all the domains. Children who had not attended pre-school also showed below average scores. However, non-attendance at pre-school can result from a variety of underlying reasons. Therefore, these scores cannot be attributed solely to the lack of pre-school education. Children from the Traveller Community also showed lower mean scores across all domains. Traveller children face a variety of challenges including accommodation in poorly serviced communal sites, greater risk of low birth weight, ill-health and hospitalisation<sup>35</sup>.

1  
2  
3 Three child-level demographics were strongly associated with vulnerability. Boys, children who start  
4 school at a younger age and those for whom English is a second language were more likely to be  
5 vulnerable. PAF illustrates that these three factors account for half of all vulnerability. These  
6 findings are consistent with international studies<sup>30 36</sup>  
7

8  
9 Hertzman describes vulnerability levels of above 15% as an unacceptable level of difficulty at school  
10 entry age<sup>37</sup>. There is considerable debate regarding the expected level of biologically determined  
11 disability. OECD country estimated range between 1.8% and 10.4%<sup>38</sup>. Considering these expected  
12 levels of biological determined developmental delay external factors can be seen to contribute to  
13 major disparities.  
14

#### 15 16 17 18 19 20 Limitations

21  
22 The overall study was representative of children in their first year in formal education in Cork city.  
23 However, there was a 63% return rate on the parental questionnaire. While this compares  
24 favourably to other jurisdictions where this method has been used<sup>34</sup>, there are significant  
25 differences between those for whom parental data were available and those for whom it was not.  
26 It is clear that the most vulnerable children were underrepresented in the parental sample.  
27

28  
29 This was the first study using the EDI in Ireland. Therefore, there was limited scope for validity  
30 testing. Comparisons with Canadian normative data, internal validity testing and qualitative work  
31 with teachers indicate that the EDI functions well in the Irish context. Future research will consider  
32 Rasch modelling and examining issues of predictive validity.  
33

#### 34 35 Policy Implications

36  
37 Epidemiological studies have clearly linked early socio-economic circumstances to later outcomes<sup>39-</sup>  
38<sup>41</sup>. Yet, the specific factors and processes in the early years which contribute to these outcomes  
39 have not been adequately explored. The reliance on diagnostic instruments which are professionally  
40 administered and measure particular aspects of development has led to gaps in population level  
41 studies on early development outcomes<sup>17</sup>. The EDI is a unique, well-validated, population level  
42 instrument which allows us to track all five domains of early childhood development. It has the  
43 potential to enhance our understanding of the early years environment and identify populations of  
44 children at risk of developmental delay. This in turn can inform universal programmes to enhance  
45 outcomes for whole populations of children. National policy which focuses on the early years is  
46 essential with investment in peri-natal care, quality support to families and provision of pre-school  
47 care by highly skilled practitioners<sup>2</sup>. In Ireland, significant investment is being made in  
48 developing a high standard of accessible child care including a free pre-school year and a  
49 focus on quality curriculum development. This study was implemented in the year prior to the  
50 introduction throughout Ireland of the universally accessible free pre-school year and related  
51 investment in skills-enhancement for pre-school staff.  
52  
53  
54  
55

56  
57 From an Irish perspective, the study raises important questions regarding support to families where  
58 English is a second language. ESL was associated with lower mean scores across all domains. The  
59  
60

1  
2  
3 pace of immigration to Ireland increased rapidly between 1990 and 2008 in response to employment  
4 opportunities which have since diminished. There is evidence of communities of immigrant  
5 populations living in areas of newly emerging disadvantage which lack the support structures  
6 associated with established communities. Indeed this study has identified such communities in  
7 which there were vulnerability rates of close to 50%. Particular attention also needs to be focused  
8 on the implications of the findings in relation to age. Attendance at school is not mandatory until  
9 children are six years old but they may start once they are four, leading to classes with mixed age  
10 groups. Moreover, attendance by children under six is not officially monitored.

11  
12  
13  
14 Poverty and inequality affect up to one quarter of Irish children. Throughout the boom years  
15 Irish policy in tackling child poverty consisted almost uniquely of direct payments to families, a  
16 practice which is now under threat. Moreover, little consideration was given to creating structures  
17 and policies to support and protect families. Tackling child poverty through a strategy of area-  
18 based prevention and early intervention features highly on the agenda of the current  
19 government<sup>42</sup>. This focus on both universal and targeted interventions has the potential to  
20 contribute to breaking this cycle of poverty. However, effective targeting in the context of  
21 early childhood development is problematic, with many instruments providing poor  
22 predictive reliability<sup>43</sup>. There is a need for longitudinal and population-level data which can  
23 be linked to administrative sources to provide a holistic basis for effective programming<sup>44</sup>. In  
24 Australia and Canada the EDI is providing just such data on early childhood development.

25  
26  
27  
28  
29 Early childhood development is a key public health issue that needs to be addressed  
30 through a comprehensive programme of targeted and universal approaches, supported by  
31 high quality research. The EDI can play a critical role in informing policy and practice at a  
32 local and national level, and allowing for internationally comparable studies on early  
33 childhood development.  
34  
35  
36  
37  
38  
39  
40  
41  
42  
43  
44  
45  
46  
47  
48  
49  
50  
51  
52  
53  
54  
55  
56  
57  
58  
59  
60

Table 1: Child development outcomes measured by the EDI

| EDI Domains /Sub-domains                     | Expected behaviour                                                                                                                                                                              |
|----------------------------------------------|-------------------------------------------------------------------------------------------------------------------------------------------------------------------------------------------------|
| <b>PHYSICAL HEALTH &amp; WELL BEING</b>      |                                                                                                                                                                                                 |
| <b>Physical readiness for school day</b>     | Usually dressed appropriately for school and not tired, late or hungry.                                                                                                                         |
| <b>Physical independence</b>                 | Can look after own personal needs appropriately, established hand preference, well coordinated, and do not suck a thumb/finger.                                                                 |
| <b>Gross and fine motor skills</b>           | Physically able to participate in school and excellent or good gross and fine motor skills.                                                                                                     |
| <b>SOCIAL COMPETENCE</b>                     |                                                                                                                                                                                                 |
| <b>Overall social competence</b>             | Very good ability to play and get along with various children, usually cooperative and self-confident.                                                                                          |
| <b>Responsibility and respect</b>            | Respect for others and for property, follow rules and take care of materials, accept responsibility for actions, and show self-control.                                                         |
| <b>Approaches to learning</b>                | Can work neatly, independently, and solve problems, follow instructions and class routines, easily adjust to changes.                                                                           |
| <b>Readiness to explore new things</b>       | Curious about the surrounding world, and eager to explore new books, toys and games.                                                                                                            |
| <b>EMOTIONAL MATURITY</b>                    |                                                                                                                                                                                                 |
| <b>Pro-social and helping behaviour</b>      | Helping someone hurt, sick or upset, offering to help spontaneously, invite bystanders to join in.                                                                                              |
| <b>Anxious and fearful behaviour</b>         | Seldom or never showing anxious behaviours; happy and able to enjoy school, comfortable being left at school by caregivers.                                                                     |
| <b>Aggressive behaviour</b>                  | Seldom or never showing aggressive behaviours; not using aggression to solve conflict, not having temper tantrums, and not mean to others.                                                      |
| <b>Hyperactivity and inattention</b>         | Not showing hyperactive behaviours; able to concentrate, attend to chosen activities, wait their turn, and usually think before doing.                                                          |
| <b>LANGUAGE &amp; COGNITIVE</b>              |                                                                                                                                                                                                 |
| <b>Basic literacy skills</b>                 | Have basic literacy skills: can handle a book, identify some letters and attach sounds to some letters, show awareness of rhyming words, know the writing directions, and write their own name. |
| <b>Interest literacy/numeracy and memory</b> | Showing interest in books and reading, math and numbers, and no difficulty remembering things.                                                                                                  |
| <b>Advanced literacy skills</b>              | Can read simple, complex words or sentences, write voluntarily, write simple words or sentences.                                                                                                |
| <b>Basic numeracy skills</b>                 | Can count to 20, recognize shapes and numbers, compare numbers, sort and classify, use one-to-one correspondence, and understand simple time concepts.                                          |
| <b>COMMUNICATION &amp; GENERAL KNOWLEDGE</b> |                                                                                                                                                                                                 |
| <b>Communication and general knowledge</b>   | Can communicate easily and effectively, can participate in story-telling or imaginative play, articulate clearly, show adequate general knowledge, and are proficient in their native language. |

Table 2: Comparison between sample for whom parental data was and was not available

|                                         | Parental<br>n= 865 | No Parental<br>n=378 | Sig   |
|-----------------------------------------|--------------------|----------------------|-------|
| Mean Age - years (SD)                   | 5.38 (.39)         | 5.36 (0.43)          | .405  |
| Female                                  | 46%                | 45%                  | .719  |
| English as a Second Language            | 10%                | 19%                  | <.001 |
| Identified Special needs                | 5%                 | 10%                  | <.001 |
| Member of the Traveller Community       | 2%                 | 6%                   | <.001 |
| <b>Mean EDI scores by domain (SD)</b>   |                    |                      |       |
| Physical health and wellbeing           | 8.8 (1.4)          | 8.1 (2.0)            | <.001 |
| Social competence                       | 8.3 (1.8)          | 7.5 (2.1)            | <.001 |
| Emotional maturity                      | 7.7 (1.6)          | 7.2 (1.7)            | <.001 |
| Language and cognitive development      | 8.8 (1.6)          | 8.0 (2.4)            | <.001 |
| Communication skills and gen knowledge  | 7.5 (2.8)          | 6.2 (3.2)            | <.001 |
| % Vulnerable in 1 or more domain of EDI | 23%                | 41%                  | <.001 |

**Table 3: Factors associated with developmental vulnerability (Univariate analysis)**

|                                             | n(%)     | % vulnerable* | OR  | CI           |
|---------------------------------------------|----------|---------------|-----|--------------|
| Male                                        | 463 (54) | 30%           | 2.2 | (1.6 - 3.1)  |
| English as a second language (ESL)          | 85 (10)  | 49%           | 3.8 | (2.4 - 6.1)  |
| Age <5 years                                | 146 (17) | 31%           | 1.6 | (1.1 - 2.4)  |
| Low birth weight (<2500g)                   | 49 (6)   | 41%           | 2.5 | (1.4 - 4.5)  |
| Mother primary education only               | 38 (4)   | 37%           | 2.8 | (1.3 - 5.8)  |
| Mother secondary education only             | 297 (34) | 27%           | 1.7 | (1.1 - 2.6)  |
| Four or more hours screen-time per day      | 128 (15) | 32%           | 2.0 | (1.2 - 3.4)  |
| Never told stories in the past week         | 10 (1)   | 50%           | 4.2 | (1.2 - 14.8) |
| Told stories once or twice in the past week | 82 (9)   | 32%           | 1.9 | (1.2 - 3.3)  |
| No preschool                                | 44 (5)   | 43%           | 2.7 | (1.4 - 5.0)  |

\*Refers to the % of children vulnerable in one or more of the five domains of the EDI



**Table 4: Logistic Regression predicting likelihood of vulnerability on EDI Scores**

|                                              | OR (95% CI)*     | OR (95% CI)**    |
|----------------------------------------------|------------------|------------------|
| Male                                         | 2.5 (1.8 - 3.6)  | 2.7 (1.8 - 3.9)  |
| ESL                                          | 4.3 (2.6 - 6.9)  | 4.5 (2.6 - 7.8)  |
| Age <5 years                                 | 1.4 (0.9 - 2.2)  | 1.3 (0.8 - 2.0)  |
| Low Birth Weight                             | 2.6 (1.4 - 4.9)  | 2.6 (1.3 - 5.0)  |
| Mother Education (ref: University education) |                  |                  |
| Primary or less                              | 3.1 (1.4 - 6.7)  | 2.5 (1.0 - 6.0)  |
| Secondary                                    | 2.1 (1.3 - 3.3)  | 2.1 (1.3 - 3.4)  |
| Diploma                                      | 1.5 (0.9 - 2.3)  | 1.5 (0.9 - 2.4)  |
| Daily Screen time (ref: 1 hour or less)      |                  |                  |
| 2 to 3 hours                                 | 1.2 (0.8 - 1.8)  | 1.0 (0.6 - 1.6)  |
| 4 or more hours                              | 1.7 (1.0 - 3.0)  | 1.2 (0.6 - 2.1)  |
| Stories in the past week (ref: every day)    |                  |                  |
| : Never                                      | 3.9 (1.0 - 14.3) | 5.3 (1.3 - 21.1) |
| Once or twice                                | 1.7 (1.0 - 2.9)  | 1.4 (0.8 - 2.5)  |
| Many times                                   | 1.2 (0.8 - 1.7)  | 1.1 (0.7 - 1.6)  |
| No Pre-school                                | 1.9 (1.0 - 3.8)  | 1.5 (0.7 - 3.1)  |

\* Adjusted for Age, gender and ESL (separate tests run for each subsequent variable)

\*\* Adjusted for all other variables in one model

**Table 5: PAF for vulnerability based on OR adjusted for all other variables**

|                                   | N (%)    | OR (95% CI)**    | PAF (95% CI)        |
|-----------------------------------|----------|------------------|---------------------|
| Under five                        | 146 (17) | 1.3 (0.8 - 2.0)  | 3.0 (-2.8 - 8.5)    |
| Male                              | 463 (54) | 2.7 (1.8 - 3.9)  | 34.6 (21.3 - 45.7)  |
| ESL                               | 85 (10)  | 4.5 (2.6 - 7.8)  | 12.2 (7.3 - 16.8)   |
| Low Birth Weight                  | 49 (6)   | 2.6 (1.3 - 5.0)  | 4.5 (1.0 - 8.0)     |
| Mother Education: Primary or less | 38 (4)   | 2.5 (1.0 - 6.0)  | 2.8 (-0.2 - 5.7)    |
| Secondary                         | 297 (34) | 2.1 (1.3 - 3.4)  | 16.8 (5.9 - 26.5)   |
| Diploma                           | 263 (30) | 1.5 (0.9 - 2.4)  | 7.7 (-1.8 - 16.3)   |
| Daily Screen time: 2 to 3 hours   | 532 (61) | 1.0 (0.6 - 1.6)  | -0.3 (-21.7 - 17.3) |
| 4 or more hours                   | 128 (15) | 1.2 (0.6 - 2.1)  | 1.6 (-5.2 - 7.9)    |
| Stories in the past week: Never   | 10 (1)   | 5.3 (1.3 - 21.1) | 1.7 (0.1 - 3.3)     |
| Once or twice                     | 82 (9)   | 1.4 (0.8 - 2.5)  | 2.6 (-2.1 - 7.0)    |
| Many times                        | 251 (29) | 1.1 (0.7 - 1.6)  | 1.7 (-6.8 - 9.5)    |
| No Pre-school                     | 44 (5)   | 1.5 (0.7 - 3.1)  | 1.8 (-1.6 - 5.1)    |
| <b>Total PAF</b>                  |          |                  | <b>90.7</b>         |

\*\* Adjusted for all other variables

**Funding:** This work was supported by the Health Research Board in Ireland under grant number PHD/2007/16

No competing interests exist

**Ethical approval** for this study was obtained from the Clinical Research Ethics Committee of the Cork Teaching Hospitals, Cork, Ireland.

## REFERENCES

1. Kershaw P, Forer B. Selection of area-level variables from administrative data: an intersectional approach to the study of place and child development. *Health Place* 2010;16(3):500-11.
2. Marmot M, Allen J, Goldblatt P, Boyce T, McNeish D, Grady M, et al. 'Fair Society Health Lives', The Marmot Review. In: England SRoHli, editor. London, 2010.
3. Power C, Elliott J. Cohort profile: 1958 British birth cohort (National Child Development Study). *International Journal of Epidemiology* 2006;35(1):34-41.
4. Lemelin J-P, Boivin M, Forget-Dubois N, Dionne G, Brendgen M, Séguin JR, et al. The Genetic-Environmental Etiology of Cognitive School Readiness and Later Academic Achievement in Early Childhood. *Child Development* 2007;78(6):1855-69.
5. Nicholson JM, Lucas N, Berthelsen D, Wake M. Socioeconomic inequality profiles in physical and developmental health from 0-7 years: Australian National Study. *Journal of Epidemiology & Community Health* 2012;66(1):81-87.
6. Leventhal T, Brooks-Gunn J. The Neighborhoods They Live in: The Effects of Neighborhood Residence on Child and Adolescent Outcomes. *Psychological Review* 2000;126(2):309 - 37.
7. Heckman JJ, Masterov DV. The Productivity Argument for Investing in Young Children. *Applied Economic Perspectives and Policy* 2007;29(3):446-93.
8. Kershaw P, Warburton B, Anderson L, Hertzman C, Irwin LG, Forer B. The economic costs of early vulnerability in Canada. *Can J Public Health* 2010;101 Suppl 3:S8-12.
9. Guhn M, Janus M, Hertzman C. The Early Development Instrument: Translating school readiness assessment into community actions and policy planning. *Early Education and Development* 2007;18(3):369-74.
10. Rose G. Sick Individuals and Sick Populations. *International Journal of Epidemiology* 1985;14:32 - 38.
11. Janus M, Brinkman S, Duku E. Validity and Psychometric Properties of the Early Development Instrument in Canada, Australia, United States, and Jamaica. *Social Indicators Research* 2011;103(2):283-97.
12. Brinkman S, Gialamas A, Rahman A, Mittinty MN, Gregory TA, Silburn S, et al. Jurisdictional, socioeconomic and gender inequalities in child health and development: analysis of a national census of 5-year-olds in Australia. *BMJ Open* 2012;2(5).
13. C.S.O. Profile 7: Religion, Ethnicity and Irish Travellers. Cork: Central Statistics Office, 2012.
14. Haase T, Pratschke J. Deprivation and its Spatial Articulation in the Republic of Ireland. Dublin: Area Development Management, 2005.
15. OMCYA. State of the Nations Children. Dublin: Office of the Minister for Children and Youth Affairs, 2010.
16. Janus M, Brinkman S, Duku E, Hertzman C, Santos R, Sayers M, et al. The Early Development Instrument: A Population-based Measure for Communities. Hamilton, Ontario: Offord Centre for Child Studies, McMaster University, 2007.

17. Janus M, Offord DR. Development and Psychometric Properties of the Early Development Instrument (EDI): A Measure of Children's School Readiness. *Canadian Journal of Behavioural Science-Revue Canadienne Des Sciences Du Comportement* 2007;39(1):1-22.
18. D'Angiulli A, Warburton W, Dahinten S, Hertzman C. Population-level associations between preschool vulnerability and grade-four basic skills. *PLoS One* 2009;4(11):e7692.
19. Brinkman S, Silburn S, Lawrence D, Goldfeld S, Sayers M, Oberklaid F. Investigating the validity of the Australian Early Development Index. *Early Education and Development* 2007;18(3):427-51.
20. Muhajarine N, Puchala C, Janus M. Does the EDI Equivalently Measure Facets of School Readiness for Aboriginal and Non-Aboriginal children? *Social Indicators Research* 2011;103(2):299-314.
21. Williams J, Greene S, Doyle E, Harris E, Layte R, McCoy S, et al. Growing up in Ireland national longitudinal study of children. The lives of 9 year olds: The Stationery Office, 2009.
22. Morgan K, McGee H, Watson D, Perry I, Barry M, Shelley E, et al. SLAN 2007: Survey of Lifestyle, Attitudes & Nutrition in Ireland: Main Report. Dublin: Department of Health and Children, 2008.
23. Brinkman S, Sayers M, Goldfeld S, Kline J. Population monitoring of language and cognitive development in Australia: the Australian Early Development Index. *International Journal of Speech-Language Pathology* 2009;11(5):419-30.
24. Carey DJ. *The Essential Guide to Special Education in Ireland*. Dublin: Primary ABC, 2005.
25. O'Sullivan JJ, Pearce MS, Parker L. Parental recall of birth weight: how accurate is it? *Archives of Disease in Childhood* 2000;82(3):202-03.
26. Hanley JA. A heuristic approach to the formulas for population attributable fraction. *Journal of Epidemiology and Community Health* 2001;55(7):508-14.
27. Miettinen OS. Proportion of disease caused or prevented by a given exposure, trait or intervention. *American Journal of Epidemiology* 1974(99):325 - 32.
28. Greenland S, Drescher K. Maximum likelihood estimation of the attributable fraction from logistic models. *Biometrics* 1993;49:865-72.
29. Carpiano RM, Lloyd JEV, Hertzman C. Concentrated affluence, concentrated disadvantage, and children's readiness for school: A population-based, multi-level investigation. *Social Science & Medicine* 2009;69(3):420-32.
30. Janus M, Duku E. The School Entry Gap: Socioeconomic, Family, and Health Factors Associated With Children's School Readiness to Learn. *Early Education and Development* 2007;18(3):375-403.
31. Kohen D, Oliver L, Pierre F. Examining the effects of schools and neighbourhoods on the outcomes of Kindergarten children in Canada. *International Journal of Speech-Language Pathology* 2009;11(5):404-18.
32. Bus AG, Van Ijzendoorn MH. Mothers Reading to Their 3-Year-Olds: The Role of Mother-Child Attachment Security in Becoming Literate. *Reading Research Quarterly* 1995;30(4):998-1015.
33. Fletcher KL, Reese E. Picture book reading with young children: A conceptual framework. *Developmental Review* 2005;25(1):64-103.
34. Janus M. Transition to school. In: Laverick DM, Jalongo MR, editors. *Transitions to early care and education*: Springer Netherlands, 2011:177 - 87.
35. Abdalla S, Cronin F, Daly L, Drummond A, Fitzpatrick P, Frazier K, et al. Our Geels: All Ireland Traveller Health Study. Dublin, 2010:University College Dublin.
36. Maggi S, Irwin LJ, Siddiqi A, Hertzman C. The social determinants of early child development: an overview. *J Paediatr Child Health* 2010;46(11):627-35.
37. Hertzman C. The state of child development in Canada: Are we moving toward, or away from, equity from the start? *Paediatr Child Health* 2009;14(10):673-6.
38. Banks J, McCoy S. A Study on the Prevalence of Special Educational Needs. Dublin: Economic and Social Research Institute, 2011.

- 1  
2  
3 39. Lawlor DA, Ronalds G, Macintyre S, Clark H, Leon DA. Family socioeconomic position at birth and  
4 future cardiovascular disease risk: Findings from the Aberdeen children of the 1950s cohort  
5 study. *American Journal of Public Health* 2006;96(7):1271-77.  
6  
7 40. Irwin LG, Siddiqi A, Hertzman C. Early Child Development: A Powerful Equaliser: WHO  
8 Commission on Social Determinants of Health, 2007.  
9  
10 41. Ford-Jones EL, Williams R, Bertrand J. Social paediatrics and early child development: Part 1.  
11 *Paediatr Child Health* 2008;13(9):755-8.  
12  
13 42. Programme for Government 2011 - 2016. In: Expenditure DoP, editor. Dublin, 2011.  
14  
15 43. Lynch JW, Law C, Brinkman S, Chittleborough C, Sawyer M. Inequalities in child healthy  
16 development: Some challenges for effective implementation. *Social Science & Medicine*  
17 2010;71(7):1244-48.  
18  
19  
20  
21  
22  
23  
24  
25  
26  
27  
28  
29  
30  
31  
32  
33  
34  
35  
36  
37  
38  
39  
40  
41  
42  
43  
44  
45  
46  
47  
48  
49  
50  
51  
52  
53  
54  
55  
56  
57  
58  
59  
60

1  
2  
3  
4  
5  
6  
7 **Determinants of Vulnerability in Early Childhood Development in**  
8 **Ireland – a Population Level Study**  
9

10 <sup>1</sup>Margaret Curtin

11 <sup>1</sup>Jamie Madden

12 <sup>2</sup>Anthony Staines

13 <sup>1</sup>Ivan J. Perry

14  
15 <sup>1</sup>Department of Epidemiology and Public Health, University College Cork, Ireland

16 <sup>2</sup>School of Nursing and Human Sciences, Dublin City University, Ireland

17  
18  
19 Corresponding author: Margaret Curtin

20  
21 Department of Epidemiology and Public Health,  
22 Floor 4, Western Gateway Building,  
23 University College Cork,  
24 Cork, Ireland.

25 Telephone: +353 86 3219121

26 Fax: +353 21 4205469

27  
28  
29 e-mail: [m.curtin@ucc.ie](mailto:m.curtin@ucc.ie)

30  
31  
32  
33  
34 **Key words:** Child development; pre-school child; population health; epidemiological measurement

35  
36 **Word Count:** ~~2927~~3998

**ARTICLE SUMMARY****Article focus**

- This study demonstrates that significant population level variation exists in healthy child development **in Ireland**.
- The Early Development Instrument (EDI) is a unique, well-validated population level instrument which allows us to track all five domains of early development and identify populations of children at risk.
- When used in conjunction with a parental questionnaire factors which impact on child development at the child **and**, family **and community** level can be identified.

**Key Messages**

- A direct population level evidence base on normal child development is needed both as an indicator of child health and a predictor of future outcomes.
- Three child-level demographic factors (age, gender and language) accounted for over half of the population level risk of developmental vulnerability, reinforcing the need for universal early childhood programmes which are cognisant of these variations.

**Strengths and limitations of the study**

- This is the first population level study in Europe assessing child development outcomes across multiple domain using the EDI>
- The study identifies proximal factors associated with child development, yet children and families do not live in a vacuum. Further research is needed to identify associated factors in the broader socio-cultural environment.

**BACKGROUND**

There is significant epidemiological evidence that early childhood development (from gestation to age six) strongly influences life-long health trajectories<sup>1</sup>. Indeed, major public health problems such as obesity, heart-disease and mental health problems can be seen to have roots in early childhood<sup>2</sup>.<sup>3</sup> This results from a complex interplay between genetic makeup, in utero development, and both pre and postnatal environmental factors, all of which influence brain development in the first five years of life.<sup>4</sup>

Field Code Changed

Field Code Changed

Field Code Changed

There is also evidence of a social gradient in child development<sup>5</sup>, with children from poorer backgrounds doing less well in school and entering into an intergenerational cycle of reduced employment opportunities, higher fertility and health inequalities<sup>6</sup>. The long term social and economic gain of investing in the early years is also recognised<sup>7</sup>. Kershaw estimates that the cost of preventable early childhood vulnerability to the Canadian economy is between \$2.2 and \$3.4 trillion<sup>8</sup>.

Field Code Changed

Field Code Changed

Field Code Changed

The challenge for public health, is to give due consideration to early childhood development both as an indicator of child health and as a predictor of future outcomes. Child development has been recognised as a key social determinant (Furumoto-Dawson et al., 2007, Maggi et al., 2010). Moreover, the relatively large numbers of children with less pronounced development delay are a potentially greater burden than a small number of children at high risk<sup>9</sup> leading to a need for a population health approach<sup>10</sup>. Yet, measurement of child development is usually in the form of a diagnostic which aims to identify children at greatest risk and provide appropriate individual care, leaving a dearth of research evidence on which to build population level strategies (Guhn et al., 2007a, Avan and Kirkwood, 2010). In this context a direct population level evidence base on normal child development is needed.

Field Code Changed

Field Code Changed

The Early Development Instrument (EDI) is an internationally accepted, validated tool which has the potential to provide such an evidence base<sup>11</sup>. In Australia the EDI (AEDI) has been used universally as a census of child development and has revealed significant variation across states<sup>12</sup> and territories. This is the first population level study in Europe assessing child development outcomes across multiple domains, and using the EDI and linked parental questionnaire. The overall objective of the study was to ascertain the proportion of children who were developmentally ready for school in a representative sample of schools in a major urban centre in Ireland using the EDI and to examine associated factors. The study also aimed to assess the feasibility of implementing the EDI and its performance in this setting.

Field Code Changed

Field Code Changed

Ireland is a largely homogenous country with 85.8% of the population ethnically White Irish and a further 9.3% of other white ethnic background, primarily British<sup>13</sup>. Cork is one of five major urban centres. While all of these centres are comprised of areas of concentrated affluence and disadvantage, there are similar overall rates of key socio-economic indicators including unemployment, lone-parent families and education<sup>14</sup>. There is a total population of 64,937 five year olds. A minority ( 1.1%) of Irish children are members of the Traveller Community. Moreover, 19.5% are considered at risk of poverty and 8% live in consistent poverty<sup>15</sup>. The education system is static throughout the country.

Formatted: Do not check spelling or grammar, Superscript

Formatted: Do not check spelling or grammar, Superscript

Formatted: Do not check spelling or grammar, Superscript

**METHODS**

This observational study of child development was implemented with children in their first year of formal education (i.e. in Ireland this is referred to as 'Junior Infants') in 42 of the 47 primary schools in Cork city. Five schools in the city declined to take part. These declining schools were representative of a cross-section of schools in Cork - one boys school, one girls school, one large mixed, middle income school, one designated disadvantaged school and one Irish speaking school - and their omission would not have affected the demographic composition of the study. A further four schools agreed to participate in the study but chose not to administer the parental questionnaire as they believed it would put undue pressure on parents with literacy challenges. These were all designated disadvantaged schools and this has contributed to the under-representation of the most vulnerable children in the parental study.

All eligible children in the participating schools were invited to be included in the study. Eligibility criteria were: being in the latter half of the first year of formal education (i.e. having completed A minimum of 4 to 5 months of education), being in the class known by the teacher for more than one month and not having left the school.

### Measurement of Child Development - The Early Development Instrument

Child development at school entry age was measured using the Early Development Instrument (EDI). This population level measure was designed at the Offord Centre for Child Studies, McMaster University, Hamilton, Ontario in the late 90s to measure the extent to which children have attained the physical, social, emotional and cognitive maturity necessary to engage in school activities<sup>16,17</sup>. The EDI is a community or population level measure, not an individual screening or diagnostic tool. The underlying focus is that of a population health approach i.e. small modifications of risk for large numbers are more effective at producing change than large modifications for small numbers<sup>10</sup>. It can be retrospective, focusing on early childhood development outcomes; or predictive, informing school and child-health programmes<sup>16,17</sup>. The instrument consists of five domains, sixteen sub-domains and 104 questions. The domains and sub domains are outlined in Table 1.

The EDI is a well validated instrument which has had extensive psychometric testing done both in Canada and Australia<sup>11, 16-19</sup> (Janus et al., 2007, Janus and Offord, 2007, D'Anigulli et al., 2009, Brinkman et al., 2007, Janus et al., 2011). It has also been proven valid for use in minority populations<sup>20</sup>. In this Irish study, the EDI had good internally consistency with Cronbach alphas of between 0.8 and 0.96.

### Parental Questionnaire

In 2003 a parental questionnaire was developed and tested by the Offord Centre to complement the results of the EDI and provide a deeper population level context to the lives of children<sup>16</sup>. This questionnaire was adapted to suit the Irish context incorporating validated questions from the Growing Up in Ireland Study<sup>21</sup> and the SLAN Survey of Lifestyles, Behaviour and Nutrition in Ireland<sup>22</sup>. and it consists of seven sections: child health and development; child care; pre-school; school; family; neighbourhood; and background information.

### Data collection

The EDI is a teacher completed questionnaire based on five months observation of the children from the date when they start school, and was, therefore, implemented in the latter half of the first year

**Formatted:** Do not check spelling or grammar, Superscript



1  
2  
3  
4  
5  
6  
7 of formal education. Prior to completing the questionnaires, the teachers were given a short  
8 training and were each issued with an EDI guide book. Children were not present when the  
9 questionnaire was completed and no individual identifiers were recorded. Each child was assigned  
10 a form ID which was used on both the EDI and Parental Questionnaire.

11 Passive consent was used in line with previous EDI studies in Canada. An information letter was  
12 distributed to all parents by the class teacher two weeks before commencing the study. Parents  
13 were given detailed information on the study and asked to contact the school if they did not want  
14 their child included. A total of seven parents opted not to participate. Ethical approval was granted  
15 by the Clinical Research Ethics Committee of the Cork Teaching Hospitals.

16  
17  
18 The parental questionnaires ~~were administered simultaneously and~~ were distributed in school bags  
19 or homework folders. Each parental pack contained a letter of explanation, questionnaire (again  
20 with no individual identifier) and a blank envelope in which to return the questionnaire sealed to the  
21 school. Parents were reassured that the envelope would not be opened at the school.

### 22 **Developmental scoring**

23  
24 EDI scores were calculated for each developmental domain i.e. Physical Health and Well-being;  
25 Social Competence; Emotional Maturity; Language and Cognitive Development; and Communication  
26 Skills and General Knowledge. All questions had a 2 or 3 point Likert type response format (yes, no,  
27 don't know; very true, sometimes or somewhat true, never or not true, don't know). All responses  
28 had a score of 0 to 10 (2 point answers were scored 0 and 10; 3 point answers were scored 0, 5  
29 and 10). 'Don't know' responses were not scored. Domain scores refer to the child's mean score in  
30 that domain - ranging between 0 and 10. Higher scores indicate better results.

31  
32 Children who scored in the lowest 10% of the study population in one or more of the five domains of  
33 the EDI were classed as 'vulnerable'. The 10% cut off is recommended because it is higher than  
34 typical clinical cut-off's and should therefore include children who may be more difficult to diagnose  
35 <sup>23</sup>. Those scoring in the lowest 10-25% for one or more domains were deemed 'at risk' and children  
36 who scored in the top 75% were 'on track' in that domain. Each domain was scored separately as  
37 children who are vulnerable in one area cannot compensate through competence in another. All  
38 scores were aggregated to the group level. In the absence of an Irish normative sample, to ensure  
39 the validity of the cut-off points, data was also scored against Canadian normative data. There was a  
40 99% correlation between 'vulnerability' using the Irish and Canadian cut-off points. In four of the  
41 five domains there was 100% correlation between vulnerability using the Irish and Canadian cut-off  
42 points.

Formatted: Do not check spelling or  
grammar, Superscript

43  
44  
45 Data from the parental questionnaires was linked to the teacher filled questionnaire using the Form  
46 ID number and the matching was crosschecked using the recorded date of birth and gender.  
47 Questions, again, were constructed in a Likert type response format - yes, no or three to five  
48 response options. Demographic questions on child's date of birth and birth weight were also  
49 included.

### 50 **Explanatory variables**

51  
52 The child's age was calculated from their date of birth and the date on which the form was  
53 completed and reported in years and months. 'Children for whom English is a second language  
54  
55  
56  
57  
58  
59  
60

(ESL) refers to those reported by the teacher to have a first language other than English. Members of the Travelling Community were children who were known by school to be part of this Irish ethnic minority group.

'Children identified as special needs' refers to those children who had already been identified as needing special assistance in the classroom. In Ireland this is defined as having a 'Special Education Condition' which has been recognised through a standardised assessment process<sup>24,44</sup>.

Parental reported birth weight was used to calculate whether the child had a low birth weight i.e. less than 2.5kgs. Parental report of birth weight *is has been* proven to be adequately accurate to be acceptable for research purposes<sup>25,45</sup>.

Parents were asked how much time (to the nearest hour) the child spent either watching television, using the computer or playing video games on a typical school day. This was coded into '1 or less', 'two to three' and '4 or more' hours.

### Data analysis

SPSS was used to analyse data. Each child's *EDI developmental* scores were calculated by the Offord Centre for Child Studies in line with international EDI process. Initial analysis involved a cross-tabulation of potential risk items from the teacher completed EDI questionnaire (*i.e.* gender, age, ESL, pre-school attendance and membership of the Travelling Community) against the child's score in each of the developmental domains.

All further analyses reported here were confined to the sub-group of children for whom parental data was available. Univariate analysis was used to explore factors associated with 'vulnerability' i.e. being in the lowest 10% of the target population in one or more domain. Factors which proved significant ( $p < 0.05$ ) were then entered into logistic regression models to predict likelihood of vulnerability on EDI scores. The first model adjusted for age, gender and ESL. The second model adjusted for all other factors.

Population attributable fractions (PAF) were used to calculate the proportion of risk attributed to each of the factors in the final regression<sup>26-27,46-47</sup>. This was calculated using the 'punaf' command in STATA 12 *which calculates confidence intervals for PAF, and also for scenario means and their ratio, known as the population unattributable fraction. Punaf uses the method for estimating PAFs recommended by Greenland and Drescher (1993) for cohort and cross-sectional studies*<sup>28</sup>.

†

### RESULTS

EDI questionnaires were distributed to teachers of 1366 children. A total of 1243 (92%) were returned completed and valid. Of these, 45% (n=563) were girls. The average age at which children in the study started school was 4 years and 9 months. The youngest was 3 years 11 months and the oldest 6 years and 1 month.

There was considerable diversity in first language with 12.9% of the children reported to have English as a Second Language (ESL) and 36 different languages spoken. Three percent of the children

Field Code Changed

Field Code Changed

Field Code Changed

Formatted: Do not check spelling or grammar, Superscript

1  
2  
3  
4  
5  
6  
7 in the study were members of the Traveller Community. The majority of children (76%) were known  
8 by the teacher to have attended preschool in the year before commencing full-time education.

9  
10 In total, 6.6% of children had already been identified as having special needs. The study was  
11 conducted in mainstream primary schools and this number does not, therefore, include those  
12 children in Cork attending Junior Infants equivalent in special schools, who would tend to be more  
13 severely disabled.

14 Parental questionnaires were returned and linked to 865 (63%) valid child questionnaires. The  
15 characteristics of the study population varied somewhat between the overall study and  
16 those who returned the parental questionnaire. In particular, the proportion of children for  
17 whom English was a second language fell from 12.7% in the overall group to 9.8% in those  
18 returning parental questionnaires; for children reported as having special needs, the  
19 proportions were 6.15 and 5.0 % respectively; and for those reported to be members of the  
20 Travelling community, 3.1% and 1.7% respectively. The characteristics of the ~~overall~~  
21 population ~~and those~~ who returned the parental questionnaire ~~and those who did not are compared~~  
22 ~~are outlined~~ in Table 2.

Formatted: Font: Not Bold

#### 23 24 25 26 **Distribution of domain scores (Mean and standard error)**

27 Mean scores varied across the EDI domains. However, particular groups of children consistently  
28 scored below the mean in all domains i.e. boys, children who had English as a second language,  
29 members of the Traveller Community, children who had not been to pre-school and those who were  
30 under four years 10 months at the time of the study. This is outlined in Figure 1 with the vertical axis  
31 representing the mean domain score for the study population.

#### 32 33 **Vulnerability**

34  
35 ~~The majority of children scored well in each domain, with 71% not showing any vulnerability.~~  
36 ~~However, over one quarter (28.6%) of all children in the study were developmentally vulnerable (i.e.~~  
37 ~~in the lowest 10<sup>th</sup> percentile for one or more domain). In total 12% were vulnerable in one domain,~~  
38 ~~6% in 2 and only 3% of children were vulnerable in all 5 domains.~~

#### 39 40 **Factors associated with vulnerability**

41  
42 Over one quarter (28.6%) of children in the study were developmentally vulnerable (i.e. in the  
43 lowest 10<sup>th</sup> percentile for one or more domains). In total 12% were vulnerable in only one domain,  
44 6% in 2 domains, 5% in 3 domains, 3% in 4 domains and 3% were vulnerable in all 5 domains.

45  
46 The following analysis is based only the subset of the study population (n=865) on whom parental  
47 questionnaires were returned.

48  
49 Factors associated with developmental vulnerability (outlined in Table 3) were being male (odds  
50 ratio [OR] =2.2, 95% confidence interval [CI] = 1.6 – 3.1), ESL (OR = 3.8, CI= 2.4 – 6.1), being under  
51 five years of age at the time of the study (OR = 1.6, CI = 1.1 – 2.4) and low birth weight (OR=2.5,  
52 CI=1.4 – 4.5). When compared with children whose mothers had a university education those with  
53 only primary education (OR= 2.8, CI = 1.3 - 5.8) or secondary level (OR = 1.7, CI = 1.1 - 2.6) showed  
54 higher levels of vulnerability. Children who were never or seldom told stories in the past week and  
55  
56  
57  
58  
59  
60

those who spent more than four hours watching television or playing video games also showed significantly increased vulnerability.

### Logistic Regression

Regression analysis was then used to assess the impact of each variable on the odds of being vulnerable as outlined in Table 4. The first model controlled for being male, having English as a second language and being under five years of age at the time of EDI completion, the second also controlled for all other factors. Children whose birth weight was less than 2.5kg were over twice as likely to be vulnerable. Mother's education showed a graded effect. When controlled for all other variables, children who had not been told or read stories in the past week were over five times as likely to be vulnerable than those who were told stories every day. In the final model, the amount of time spent watching television became insignificant.

### Population Attributable Fraction (PAF)

PAF was used to measure the proportion of vulnerability attributed to each of the factors included in the final regression model (Table 5). Boys were almost three times as likely as girls to be vulnerable and being male accounted for 35% of the overall vulnerability. English as a second language accounted for 12%, and mothers education (primary, secondary or diploma) for 27% of vulnerability. Despite the high risk of vulnerability among children who were not read to (OR 5.3), this only accounted for 1.7% of the overall vulnerability reflecting its low prevalence in this population.

### DISCUSSION

This paper explored the extent to which children in a major urban centre in Ireland have attained the level of child development necessary to engage fully in the education process. ~~The majority of children in the study had achieved a level of development appropriate for their age. However, The findings suggest that, as expected,~~ a significant minority of over one quarter (28.6%) of children in the study were not developmentally ready to engage in, and thereby benefit fully from school. Clearly these findings should be interpreted cautiously in light of the current level of development of the EDI in Ireland, in particular, the lack of data on predictive validity for the EDI in the Irish population. At the same time, the fundamental issue is not the absolute scores but the unacceptable variation in scores related to socio-economic, environmental and ecological circumstances.

~~Factors associated with this level of vulnerability at the child level were being male, a younger child, having English as a second language and low birth weight. Key factors at the family level were mothers education, reading stories.~~

The overall level of developmental vulnerability was consistent with findings from urban areas in Canada where the EDI has been implemented <sup>1 29-31</sup> (Carpiano et al., 2009, Kershaw et al., 2010, Janus and Duku, 2007, Kohen et al., 2009). Indeed mean scores across all domains in the Irish sample were similar to those in the Canadian normative sample. Factors associated with increased risk of vulnerability at the child level were being male, a younger child, having English as a second language and low birth weight. Key factors at the family level were mothers education and reading stories. In the final model, the strongest predictor of vulnerability on EDI scores was story telling.

**Formatted:** Do not check spelling or grammar, Superscript

Children who were never told stories in the past week were over five times as likely to be vulnerable compared with children who were told stories every day. This supports numerous studies which show a link between reading stories and literacy development<sup>32</sup> and with broader aspects of development<sup>33</sup>. These are again consistent with findings from Canada, further supporting the transferability of the instrument between the two jurisdictions.<sup>34</sup>

**Formatted:** Do not check spelling or grammar, Superscript

**Formatted:** Do not check spelling or grammar, Superscript

**Formatted:** Do not check spelling or grammar, Superscript

The mean scores across all five domains varied between sub-groups of the population. The impact of age is very clear. Younger children, aged less than 4 years and 10 months scored on average less well across all the domains. Children who had not attended pre-school also showed below average scores. However, non-attendance at pre-school can result from a variety of underlying reasons. Therefore, these scores cannot be attributed solely to the lack of pre-school education. Children from the Traveller Community also showed lower mean scores across all domains. Traveller children face a variety of challenges including accommodation in poorly serviced communal sites, greater risk of low birth weight, ill-health and hospitalisation.<sup>35</sup>

**Formatted:** Do not check spelling or grammar, Superscript

Three child-level demographics were strongly associated with vulnerability. Boys, children who start school at a younger age and those for whom English is a second language were more likely to be vulnerable. PAF illustrates that these three factors account for half of all vulnerability. These findings are consistent with international studies.<sup>30,36</sup>

**Formatted:** Do not check spelling or grammar, Superscript

Hertzman describes this vulnerability levels of above 15% as an unacceptable level of difficulty at school entry age.<sup>37</sup> There is considerable debate regarding the expected level of biologically determined disability. OECD country estimated range between 1.8% and 10.4%.<sup>38</sup> Considering these expected levels of biological determined developmental delay is 5–8% of any given population, external factors can be seen to contribute to major disparities.<sup>48</sup>

**Formatted:** Do not check spelling or grammar, Superscript

**Formatted:** Do not check spelling or grammar, Superscript

The study had identified key factors that are associated with this developmental delay. In the final model, the strongest predictor of vulnerability on EDI scores was story telling. Children who were never told stories in the past week were over five times as likely to be vulnerable in one or more domain when compared with children who were told stories every day. This supports numerous studies which show a link between reading stories and literacy development<sup>19</sup> and with broader aspects of development.<sup>20</sup>

Three child-level demographics were strongly associated with vulnerability. Boys, children who start school at a younger age and those for whom English is a second language were also more likely to be vulnerable. PAF illustrates that these three factors account for half of all vulnerability. These findings are consistent with international studies (Maggi et al., 2010, Janus and Duku, 2007)

and reinforce the need for universal early childhood programmes which are cognisant of these variations.

#### Limitations

The overall study was representative of children in their first year in formal education in Cork city. However, there was a 63% return rate on the parental questionnaire. While this compares favourably to other jurisdictions where this method has been used<sup>34</sup>, there are significant differences between those for whom parental data were available and those for whom it was not. It is clear that the most vulnerable children were underrepresented in the parental sample.

**Formatted:** Do not check spelling or grammar, Superscript

1  
2  
3  
4  
5  
6  
7 This was the first study using the EDI in Ireland. Therefore, there was limited scope for validity  
8 testing. Comparisons with Canadian normative data, internal validity testing and qualitative work  
9 with teachers indicate that the EDI functions well in the Irish context. Future research will consider  
10 Rasch modelling and examining issues of predictive validity.

11 ~~This paper specifically considers the proximal factors associated with early childhood development.~~  
12 ~~Yet it is clear that children and families do not live in a vacuum. There are multiple factors in the~~  
13 ~~broader economic and socio-cultural environment which must be considered<sup>41</sup>.~~

#### 14 Policy Implications

15  
16  
17 Epidemiological studies have clearly linked early socio-economic circumstances to later outcomes<sup>39-</sup>  
18 <sup>41</sup> (Lawlor et al., 2006, Irwin et al., 2007, Ford Jones et al., 2008). Yet, the specific factors and  
19 processes in the early years which contribute to these outcomes have not been adequately  
20 explored. The reliance on diagnostic instruments which are professionally administered and  
21 measure particular aspects of development has led to gaps in population level studies on early  
22 development outcomes<sup>42</sup>. The EDI is a unique, well-validated, population level instrument which  
23 allows us to track all five domains of early childhood development. It has the potential to enhance  
24 our understanding of the early years environment and identify populations of children at risk of  
25 developmental delay. This in turn can inform universal programmes to enhance outcomes for whole  
26 populations of children.  
27

28  
29 National policy which focuses on the early years is essential with investment in peri-natal care,  
30 quality support to families and provision of pre-school care by highly skilled practitioners<sup>2</sup>. In  
31 Ireland, significant investment is being made in developing a high standard of accessible child  
32 care including a free pre-school year and a focus on quality curriculum development. This  
33 study was implemented in the year prior to the introduction throughout Ireland of the universally  
34 accessible free pre-school year and related investment in skills-enhancement for pre-school staff.

35  
36 From an Irish perspective, the study raises important questions regarding support to families where  
37 English is a second language. ESL was associated with lower mean scores across all domains. The  
38 pace of immigration to Ireland increased rapidly between 1990 and 2008 in response to employment  
39 opportunities which have since diminished. There is evidence of communities of immigrant  
40 populations living in areas of newly emerging disadvantage which lack the support structures  
41 associated with established communities. Indeed this study has identified such communities in  
42 which there were vulnerability rates of close to 50%. Particular attention also needs to be focused  
43 on the implications of the findings in relation to age. Attendance at school is not mandatory until  
44 children are six years old but they may start once they are four, leading to classes with mixed age  
45 groups. Moreover, attendance by children under six is not officially monitored.

46  
47 Poverty and inequality affect up to one quarter of Irish children. Throughout the boom years  
48 Irish policy in tackling child poverty consisted almost uniquely of direct payments to families, a  
49 practice which is now under threat. Moreover, little consideration was given to creating structures  
50 and policies to support and protect families. Tackling child poverty through a strategy of area-  
51 based prevention and early intervention features highly on the agenda of the current  
52 government<sup>42</sup>. This focus on both universal and targeted interventions has the potential to  
53

Formatted: Do not check spelling or grammar, Superscript

Field Code Changed

Formatted: Do not check spelling or grammar, Superscript

1  
2  
3  
4  
5  
6  
7 contribute to breaking this cycle of poverty. However, effective targeting in the context of  
8 early childhood development is problematic, with many instruments providing poor  
9 predictive reliability<sup>43</sup>. There is a need for longitudinal and population-level data which can  
10 be linked to administrative sources to provide a holistic basis for effective programming.<sup>44</sup> In  
11 Australia and Canada the EDI is providing just such data on early childhood development.

**Formatted:** Do not check spelling or grammar, Superscript

**Formatted:** Do not check spelling or grammar, Superscript

12  
13 Early childhood development is a key public health issue that needs to be addressed  
14 through a comprehensive programme of targeted and universal approaches, supported by  
15 high quality research. The EDI can play a critical role in informing policy and practice at a  
16 local and national level, and allowing for internationally comparable studies on early  
17 childhood development.

Table 1: Child development outcomes measured by the EDI

| EDI Domains /Sub-domains                     | Expected behaviour                                                                                                                                                                              |
|----------------------------------------------|-------------------------------------------------------------------------------------------------------------------------------------------------------------------------------------------------|
| <b>PHYSICAL HEALTH &amp; WELL BEING</b>      |                                                                                                                                                                                                 |
| <b>Physical readiness for school day</b>     | Usually dressed appropriately for school and not tired, late or hungry.                                                                                                                         |
| <b>Physical independence</b>                 | Can look after own personal needs appropriately, established hand preference, well coordinated, and do not suck a thumb/finger.                                                                 |
| <b>Gross and fine motor skills</b>           | Physically able to participate in school and excellent or good gross and fine motor skills.                                                                                                     |
| <b>SOCIAL COMPETENCE</b>                     |                                                                                                                                                                                                 |
| <b>Overall social competence</b>             | Very good ability to play and get along with various children, usually cooperative and self-confident.                                                                                          |
| <b>Responsibility and respect</b>            | Respect for others, others and for property, follow rules and take care of materials, accept responsibility for actions, and show self-control.                                                 |
| <b>Approaches to learning</b>                | Can work neatly, independently, and solve problems, follow instructions and class routines, easily adjust to changes.                                                                           |
| <b>Readiness to explore new things</b>       | Curious about the surrounding world, and eager to explore new books, toys and games.                                                                                                            |
| <b>EMOTIONAL MATURITY</b>                    |                                                                                                                                                                                                 |
| <b>Pro-social and helping behaviour</b>      | Helping someone hurt, sick or upset, offering to help spontaneously, invite bystanders to join in.                                                                                              |
| <b>Anxious and fearful behaviour</b>         | Seldom or never showing anxious behaviours; happy and able to enjoy school, comfortable being left at school by caregivers.                                                                     |
| <b>Aggressive behaviour</b>                  | Seldom or never showing aggressive behaviours; not using aggression to solve conflict, not having temper tantrums, and not mean to others.                                                      |
| <b>Hyperactivity and inattention</b>         | Not showing hyperactive behaviours; able to concentrate, attend to chosen activities, wait their turn, and usually think before doing.                                                          |
| <b>LANGUAGE &amp; COGNITIVE</b>              |                                                                                                                                                                                                 |
| <b>Basic literacy skills</b>                 | Have basic literacy skills: can handle a book, identify some letters and attach sounds to some letters, show awareness of rhyming words, know the writing directions, and write their own name. |
| <b>Interest literacy/numeracy and memory</b> | Showing interest in books and reading, math and numbers, and no difficulty remembering things.                                                                                                  |
| <b>Advanced literacy skills</b>              | Can read simple, complex words or sentences, write voluntarily, write simple words or sentences.                                                                                                |
| <b>Basic numeracy skills</b>                 | Can count to 20, recognize shapes and numbers, compare numbers, sort and classify, use one-to-one correspondence, and understand simple time concepts.                                          |
| <b>COMMUNICATION &amp; GENERAL KNOWLEDGE</b> |                                                                                                                                                                                                 |
| <b>Communication and general knowledge</b>   | Can communicate easily and effectively, can participate in story-telling or imaginative play, articulate clearly, show adequate general knowledge, and are proficient in their native language. |



**Table 2: Demographic Characteristics comparing total EDI sample and those for whom a parental questionnaire was returned**

|                                           | Total EDI sample |      | Parental Questionnaire |      |
|-------------------------------------------|------------------|------|------------------------|------|
|                                           | N                | %    | n                      | %    |
| <b>Gender</b>                             |                  |      |                        |      |
| Female                                    | 563              | 45.3 | 402                    | 46.5 |
| Male                                      | 659              | 53.0 | 463                    | 53.5 |
| Missing                                   | 21               | 1.7  |                        |      |
| <b>English as a second language (ESL)</b> |                  |      |                        |      |
| Not ESL                                   | 1072             | 86.2 | 770                    | 89.0 |
| ESL                                       | 158              | 12.7 | 85                     | 9.8  |
| Missing                                   | 13               | 1.0  | 10                     | 1.2  |
| <b>Identified Special Needs</b>           |                  |      |                        |      |
| Not Special Needs                         | 1160             | 93.3 | 821                    | 94.9 |
| Identified Special Needs                  | 82               | 6.6  | 43                     | 5.0  |
| Missing                                   | 1                | .1   | 1                      | .1   |
| <b>Member of the Travelling Community</b> |                  |      |                        |      |
| No                                        | 1196             | 96.2 | 845                    | 97.7 |
| Yes                                       | 39               | 3.1  | 15                     | 1.7  |
| Missing                                   | 8                | .7   | 5                      | .6   |

**Table 2: Comparison between sample for whom parental data was and was not available**

|                                                       | Parental<br>n= 865 | No Parental<br>n=378 | Sig                 |
|-------------------------------------------------------|--------------------|----------------------|---------------------|
| <u>Mean Age - years (SD)</u>                          | <u>5.38 (.39)</u>  | <u>5.36 (0.43)</u>   | <u>.405</u>         |
| <u>Female</u>                                         | <u>46%</u>         | <u>45%</u>           | <u>.719</u>         |
| <u>English as a Second Language</u>                   | <u>10%</u>         | <u>19%</u>           | <u>≤.001</u>        |
| <u>Identified Special needs</u>                       | <u>5%</u>          | <u>10%</u>           | <u>≤.001</u>        |
| <u>Member of the Traveller Community</u>              | <u>2%</u>          | <u>6%</u>            | <u>≤.001</u>        |
| <b><u>Mean EDI scores by domain (SD)</u></b>          |                    |                      |                     |
| <u>Physical health and wellbeing</u>                  | <u>8.8 (1.4)</u>   | <u>8.1 (2.0)</u>     | <u>≤.001</u>        |
| <u>Social competence</u>                              | <u>8.3 (1.8)</u>   | <u>7.5 (2.1)</u>     | <u>≤.001</u>        |
| <u>Emotional maturity</u>                             | <u>7.7 (1.6)</u>   | <u>7.2 (1.7)</u>     | <u>≤.001</u>        |
| <u>Language and cognitive development</u>             | <u>8.8 (1.6)</u>   | <u>8.0 (2.4)</u>     | <u>≤.001</u>        |
| <u>Communication skills and gen knowledge</u>         | <u>7.5 (2.8)</u>   | <u>6.2 (3.2)</u>     | <u>≤.001</u>        |
| <b><u>% Vulnerable in 1 or more domain of EDI</u></b> | <b><u>23%</u></b>  | <b><u>41%</u></b>    | <b><u>≤.001</u></b> |

**Table 3: Factors associated with developmental vulnerability (Univariate analysis)**

|                                             | n(%)     | % vulnerable* | OR  | CI           |
|---------------------------------------------|----------|---------------|-----|--------------|
| Male                                        | 463 (54) | 30%           | 2.2 | (1.6 - 3.1)  |
| English as a second language (ESL)          | 85 (10)  | 49%           | 3.8 | (2.4 - 6.1)  |
| Age <5 years                                | 146 (17) | 31%           | 1.6 | (1.1 - 2.4)  |
| Low birth weight (<2500g)                   | 49 (6)   | 41%           | 2.5 | (1.4 - 4.5)  |
| Mother primary education only               | 38 (4)   | 37%           | 2.8 | (1.3 - 5.8)  |
| Mother secondary education only             | 297 (34) | 27%           | 1.7 | (1.1 - 2.6)  |
| Four or more hours screen-time per day      | 128 (15) | 32%           | 2.0 | (1.2 - 3.4)  |
| Never told stories in the past week         | 10 (1)   | 50%           | 4.2 | (1.2 - 14.8) |
| Told stories once or twice in the past week | 82 (9)   | 32%           | 1.9 | (1.2 - 3.3)  |
| No preschool                                | 44 (5)   | 43%           | 2.7 | (1.4 - 5.0)  |

\*Refers to the % of children vulnerable in one or more of the five domains of the EDI

Formatted: Font: Not Bold

Formatted: Font: Not Bold



**Funding:** This work was supported by the Health Research Board in Ireland under grant number PHD/2007/16

No competing interests exist

**Ethical approval** for this study was obtained from the Clinical Research Ethics Committee of the Cork Teaching Hospitals, Cork, Ireland.

## REFERENCES

1. Kershaw P, Forer B. Selection of area-level variables from administrative data: an intersectional approach to the study of place and child development. *Health Place* 2010;16(3):500-11.
2. Marmot M, Allen J, Goldblatt P, Boyce T, McNeish D, Grady M, et al. 'Fair Society Health Lives', The Marmot Review. In: England SRoHli, editor. London, 2010.
3. Power C, Elliott J. Cohort profile: 1958 British birth cohort (National Child Development Study). *International Journal of Epidemiology* 2006;35(1):34-41.
4. Lemelin J-P, Boivin M, Forget-Dubois N, Dionne G, Brendgen J, Séguin JR, et al. The Genetic-Environmental Etiology of Cognitive School Readiness and Later Academic Achievement in Early Childhood. *Child Development* 2007;78(6):1855-69.
5. Nicholson JM, Lucas N, Berthelsen D, Wake M. Socioeconomic inequality profiles in physical and developmental health from 0-7 years: Australian National Study. *Journal of Epidemiology & Community Health* 2012;66(1):81-87.
6. Leventhal T, Brooks-Gunn J. The Neighborhoods They Live in: The Effects of Neighborhood Residence on Child and Adolescent Outcomes. *Psychological Review* 2000;126(2):309 - 37.
7. Heckman JJ, Masterov DV. The Productivity Argument for Investing in Young Children. *Applied Economic Perspectives and Policy* 2007;29(3):446-93.
8. Kershaw P, Warburton B, Anderson L, Hertzman C, Irwin LG, Forer B. The economic costs of early vulnerability in Canada. *Can J Public Health* 2010;101 Suppl 3:S8-12.
9. Guhn M, Janus M, Hertzman C. The Early Development Instrument: Translating school readiness assessment into community actions and policy planning. *Early Education and Development* 2007;18(3):369-74.
10. Rose G. Sick Individuals and Sick Populations. *International Journal of Epidemiology* 1985;14:32 - 38.
11. Janus M, Brinkman S, Duku E. Validity and Psychometric Properties of the Early Development Instrument in Canada, Australia, United States, and Jamaica. *Social Indicators Research* 2011;103(2):283-97.
12. Brinkman S, Gialamas A, Rahman A, Mittinty MN, Gregory TA, Silburn S, et al. Jurisdictional, socioeconomic and gender inequalities in child health and development: analysis of a national census of 5-year-olds in Australia. *BMJ Open* 2012;2(5).
13. C.S.O. Profile 7: Religion, Ethnicity and Irish Travellers. Cork: Central Statistics Office, 2012.
14. Haase T, Pratschke J. Deprivation and its Spatial Articulation in the Republic of Ireland. Dublin: Area Development Management, 2005.
15. OMCYA. State of the Nations Children. Dublin: Office of the Minister for Children and Youth Affairs, 2010.
16. Janus M, Brinkman S, Duku E, Hertzman C, Santos R, Sayers M, et al. The Early Development Instrument: A Population-based Measure for Communities. Hamilton, Ontario: Offord Centre for Child Studies, McMaster University, 2007.

**Formatted:** Font: Italic, Do not check spelling or grammar

**Formatted:** Font: Italic, Do not check spelling or grammar

**Formatted:** Font: Italic, Do not check spelling or grammar

**Formatted:** Font: Italic, Do not check spelling or grammar

**Formatted:** Font: Italic, Do not check spelling or grammar

**Formatted:** Font: Italic, Do not check spelling or grammar

**Formatted:** Font: Italic, Do not check spelling or grammar

**Formatted:** Font: Italic, Do not check spelling or grammar

**Formatted:** Font: Italic, Do not check spelling or grammar

**Formatted:** Font: Italic, Do not check spelling or grammar

**Formatted:** Font: Italic, Do not check spelling or grammar

- 1  
2  
3  
4  
5  
6  
7  
8  
9  
10  
11  
12  
13  
14  
15  
16  
17  
18  
19  
20  
21  
22  
23  
24  
25  
26  
27  
28  
29  
30  
31  
32  
33  
34  
35  
36  
37  
38  
39  
40  
41  
42  
43  
44  
45  
46  
47  
48  
49  
50  
51  
52  
53  
54  
55  
56  
57  
58  
59  
60
17. Janus M, Offord DR. Development and Psychometric Properties of the Early Development Instrument (EDI): A Measure of Children's School Readiness. *Canadian Journal of Behavioural Science-Revue Canadienne Des Sciences Du Comportement* 2007;39(1):1-22. **Formatted:** Font: Italic, Do not check spelling or grammar
18. D'Angiulli A, Warburton W, Dahinten S, Hertzman C. Population-level associations between preschool vulnerability and grade-four basic skills. *PLoS One* 2009;4(11):e7692. **Formatted:** Font: Italic, Do not check spelling or grammar
19. Brinkman S, Silburn S, Lawrence D, Goldfeld S, Sayers M, Oberklaid F. Investigating the validity of the Australian Early Development Index. *Early Education and Development* 2007;18(3):427-51. **Formatted:** Font: Italic, Do not check spelling or grammar
20. Muhajarine N, Puchala C, Janus M. Does the EDI Equivalently Measure Facets of School Readiness for Aboriginal and Non-Aboriginal children? *Social Indicators Research* 2011;103(2):299-314. **Formatted:** Font: Italic, Do not check spelling or grammar
21. Williams J, Greene S, Doyle E, Harris E, Layte R, McCoy S, et al. Growing up in Ireland national longitudinal study of children. The lives of 9 year olds: The Stationery Office, 2009.
22. Morgan K, McGee H, Watson D, Perry I, Barry M, Shelley E, et al. SLAN 2007: Survey of Lifestyle, Attitudes & Nutrition in Ireland: Main Report. Dublin: Department of Health and Children, 2008.
23. Brinkman S, Sayers M, Goldfeld S, Kline J. Population monitoring of language and cognitive development in Australia: the Australian Early Development Index. *International Journal of Speech-Language Pathology* 2009;11(5):419-30. **Formatted:** Font: Italic, Do not check spelling or grammar
24. Carey DJ. *The Essential Guide to Special Education in Ireland*. Dublin: Primary ABC, 2005.
25. O'Sullivan JJ, Pearce MS, Parker L. Parental recall of birth weight: how accurate is it? *Archives of Disease in Childhood* 2000;82(3):202-03. **Formatted:** Font: Italic, Do not check spelling or grammar
26. Hanley JA. A heuristic approach to the formulas for population attributable fraction. *Journal of Epidemiology and Community Health* 2001;55(7):508-14. **Formatted:** Font: Italic, Do not check spelling or grammar
27. Miettinen OS. Proportion of disease caused or prevented by a given exposure, trait or intervention. *American Journal of Epidemiology* 1974(99):325 - 32. **Formatted:** Font: Italic, Do not check spelling or grammar
28. Greenland S, Drescher K. Maximum likelihood estimation of the attributable fraction from logistic models. *Biometrics* 1993;49:865-72. **Formatted:** Font: Italic, Do not check spelling or grammar
29. Carpiano RM, Lloyd JEV, Hertzman C. Concentrated affluence, concentrated disadvantage, and children's readiness for school: A population-based, multi-level investigation. *Social Science & Medicine* 2009;69(3):420-32. **Formatted:** Font: Italic, Do not check spelling or grammar
30. Janus M, Duku E. The School Entry Gap: Socioeconomic, Family, and Health Factors Associated With Children's School Readiness to Learn. *Early Education and Development* 2007;18(3):375-403. **Formatted:** Font: Italic, Do not check spelling or grammar
31. Kohen D, Oliver L, Pierre F. Examining the effects of schools and neighbourhoods on the outcomes of Kindergarten children in Canada. *International Journal of Speech-Language Pathology* 2009;11(5):404-18. **Formatted:** Font: Italic, Do not check spelling or grammar
32. Bus AG, Van Ijzendoorn MH. Mothers Reading to Their 3-Year-Olds: The Role of Mother-Child Attachment Security in Becoming Literate. *Reading Research Quarterly* 1995;30(4):998-1015. **Formatted:** Font: Italic, Do not check spelling or grammar
33. Fletcher KL, Reese E. Picture book reading with young children: A conceptual framework. *Developmental Review* 2005;25(1):64-103. **Formatted:** Font: Italic, Do not check spelling or grammar
34. Janus M. Transition to school. In: Laverick DM, Jalongo MR, editors. *Transitions to early care and education*: Springer Netherlands, 2011:177 - 87. **Formatted:** Font: Italic, Do not check spelling or grammar
35. Abdalla S, Cronin F, Daly L, Drummond A, Fitzpatrick P, Frazier K, et al. Our Geels: All Ireland Traveller Health Study. Dublin, 2010:University College Dublin.
36. Maggi S, Irwin LJ, Siddiqi A, Hertzman C. The social determinants of early child development: an overview. *J Paediatr Child Health* 2010;46(11):627-35. **Formatted:** Font: Italic, Do not check spelling or grammar
37. Hertzman C. The state of child development in Canada: Are we moving toward, or away from, equity from the start? *Paediatr Child Health* 2009;14(10):673-6. **Formatted:** Font: Italic, Do not check spelling or grammar
38. Banks J, McCoy S. A Study on the Prevalence of Special Educational Needs. Dublin: Economic and Social Research Institute, 2011. **Formatted:** Font: Italic, Do not check spelling or grammar

39. Lawlor DA, Ronalds G, Macintyre S, Clark H, Leon DA. Family socioeconomic position at birth and future cardiovascular disease risk: Findings from the Aberdeen children of the 1950s cohort study. *American Journal of Public Health* 2006;96(7):1271-77.
40. Irwin LG, Siddiqi A, Hertzman C. Early Child Development: A Powerful Equaliser: WHO Commission on Social Determinants of Health, 2007.
41. Ford-Jones EL, Williams R, Bertrand J. Social paediatrics and early child development: Part 1. *Paediatr Child Health* 2008;13(9):755-8.
42. Programme for Government 2011 - 2016. In: Expenditure DoP, editor. Dublin, 2011.
43. Lynch JW, Law C, Brinkman S, Chittleborough C, Sawyer M. Inequalities in child healthy development: Some challenges for effective implementation. *Social Science & Medicine* 2010;71(7):1244-48.
44. Hertzman C, Williams R. Making early childhood count. *Canadian Medical Association Journal* 2009;180(1):68-71.
1. Kershaw P, Forer B. Selection of area-level variables from administrative data: an intersectional approach to the study of place and child development. *Health Place* 2010;16(3):500-11.
2. Marmot M, Allen J, Goldblatt P, Boyce T, McNeish D, Grady M, et al. 'Fair Society Health Lives', The Marmot Review. In: England SRoHli, editor. London, 2010.
3. Power C, Elliott J. Cohort profile: 1958 British birth cohort (National Child Development Study). *International Journal of Epidemiology* 2006;35(1):34-41.
4. Lemelin J-P, Boivin M, Forget-Dubois N, Dionne G, Brendgen M, Séguin JR, et al. The Genetic-Environmental Etiology of Cognitive School-Readiness and Later Academic Achievement in Early Childhood. *Child Development* 2007;78(6):1855-69.
5. Nicholson JM, Lucas N, Berthelsen D, Wake M. Socioeconomic inequality profiles in physical and developmental health from 0-7 years: Australian National Study. *Journal of Epidemiology & Community Health* 2012;66(1):81-87.
6. Leventhal T, Brooks-Gunn J. The Neighborhoods They Live in: The Effects of Neighborhood Residence on Child and Adolescent Outcomes. *Psychological Review* 2000;126(2):309-37.
7. Heckman JJ, Masterov DV. The Productivity Argument for Investing in Young Children. *Applied Economic Perspectives and Policy* 2007;29(3):446-93.
8. Kershaw P, Warburton B, Anderson L, Hertzman C, Irwin LG, Forer B. The economic costs of early vulnerability in Canada. *Can J Public Health* 2010;101 Suppl 3:S8-12.
9. Guhn M, Janus M, Hertzman C. The Early Development Instrument: Translating school readiness assessment into community actions and policy planning. *Early Education and Development* 2007;18(3):369-74.
10. Rose G. Sick Individuals and Sick Populations. *International Journal of Epidemiology* 1985;14:32-38.
11. Janus M, Brinkman S, Duku E. Validity and Psychometric Properties of the Early Development Instrument in Canada, Australia, United States, and Jamaica. *Social Indicators Research* 2011;103(2):283-97.
12. Brinkman S, Gialamas A, Rahman A, Mittinty MN, Gregory TA, Silburn S, et al. Jurisdictional, socioeconomic and gender inequalities in child health and development: analysis of a national census of 5-year-olds in Australia. *BMJ Open* 2012;2(5).
13. Janus M, Brinkman S, Duku E, Hertzman C, Santos R, Sayers M, et al. The Early Development Instrument: A Population-based Measure for Communities. Hamilton, Ontario: Offord Centre for Child Studies, McMaster University, 2007.
14. Carey DJ. *The Essential Guide to Special Education in Ireland*. Dublin: Primary ABC, 2005.
15. O'Sullivan JJ, Pearce MS, Parker L. Parental recall of birth weight: how accurate is it? *Archives of Disease in Childhood* 2000;82(3):202-03.
16. Hanley JA. A heuristic approach to the formulas for population attributable fraction. *Journal of Epidemiology and Community Health* 2001;55(7):508-14.

**Formatted:** Font: Italic, Do not check spelling or grammar

**Formatted:** Font: Italic, Do not check spelling or grammar

**Formatted:** Font: Italic, Do not check spelling or grammar

**Formatted:** Font: Italic, Do not check spelling or grammar

**Formatted:** Indent: Left: 0", Hanging: 0.5", Space After: 0 pt, Line spacing: single

17. Miettinen OS. Proportion of disease caused or prevented by a given exposure, trait or intervention. *American Journal of Epidemiology* 1974;99:325-32.
18. Hertzman C. The state of child development in Canada: Are we moving toward, or away from, equity from the start? *Paediatr Child Health* 2009;14(10):673-6.
19. Bus AG, Van Ijzendoorn MH. Mothers Reading to Their 3-Year Olds: The Role of Mother-Child Attachment Security in Becoming Literate. *Reading Research Quarterly* 1995;30(4):998-1015.
20. Fletcher KL, Reese E. Picture book reading with young children: A conceptual framework. *Developmental Review* 2005;25(1):64-103.
21. Janus M, Offord DR. Development and Psychometric Properties of the Early Development Instrument (EDI): A Measure of Children's School Readiness. *Canadian Journal of Behavioural Science-Revue Canadienne Des Sciences Du Comportement* 2007;39(1):1-22.

1  
2  
3  
4  
5  
6  
7  
8  
9  
10  
11  
12  
13  
14  
15  
16  
17  
18  
19  
20  
21  
22  
23  
24  
25  
26  
27  
28  
29  
30  
31  
32  
33  
34  
35  
36  
37  
38  
39  
40  
41  
42  
43  
44  
45  
46  
47  
48  
49  
50  
51  
52  
53  
54  
55  
56  
57  
58  
59  
60

Figure 1: Participant flow chart

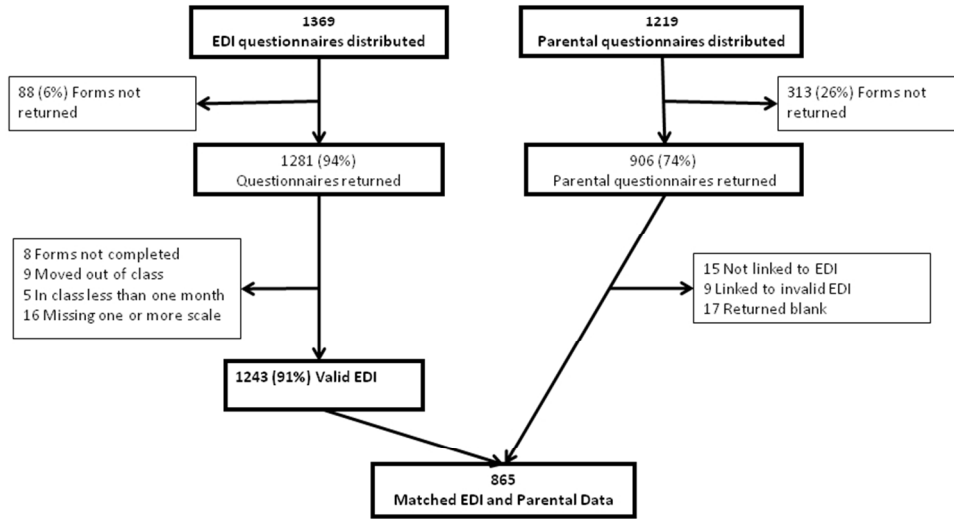

254x190mm (96 x 96 DPI)

Review only



1  
2  
3  
4  
5  
6  
7  
8  
9  
10  
11  
12  
13  
14  
15  
16  
17  
18  
19  
20  
21  
22  
23  
24  
25  
26  
27  
28  
29  
30  
31  
32  
33  
34  
35  
36  
37  
38  
39  
40  
41  
42  
43  
44  
45  
46  
47  
48  
49  
50  
51  
52  
53  
54  
55  
56  
57  
58  
59  
60

Figure 2: Distribution of scores across all five domains of development

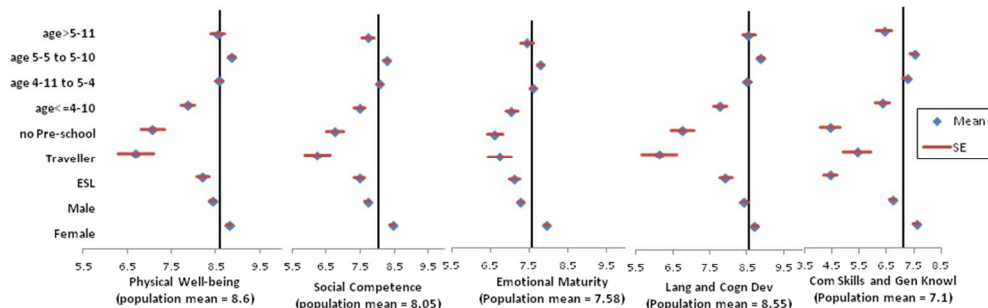

\*Each vertical axis represents the population mean for that domain

254x190mm (96 x 96 DPI)

Review only

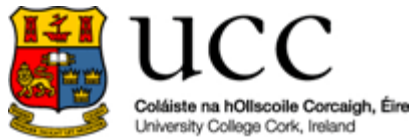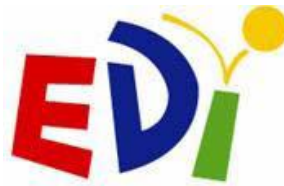

|  |  |  |  |  |  |  |  |
|--|--|--|--|--|--|--|--|
|  |  |  |  |  |  |  |  |
|--|--|--|--|--|--|--|--|

# Junior Infants Parent Survey

## Cork 2010 - 11

Please fill in the circles like this ● or ⊗. Whenever you are asked about “your child”, please answer the question based on your child in Junior Infants.

### SECTION A: CHILD HEALTH & DEVELOPMENT

1. Is your child male or female?  Male  Female
2. When was your child born? \_\_\_\_\_ day \_\_\_\_\_ month \_\_\_\_\_ year
3. What was your child's weight at birth? \_\_\_\_\_ lbs \_\_\_\_\_ oz or \_\_\_\_\_ grams
4. Does your family have a regular family doctor or health care provider that you can talk to about your child's health?  Yes  No
5. In general, would you say your child's health is:  Excellent  Very Good  Good  Fair  Poor
6. Do you feel your child has a special need that is not yet recognized by the school?  Yes  No

| 7. In a typical WEEK, how often does your child                                                                                                                             | Always                | Most of the time      | Sometimes             | Never                 |
|-----------------------------------------------------------------------------------------------------------------------------------------------------------------------------|-----------------------|-----------------------|-----------------------|-----------------------|
| a. Eat breakfast?                                                                                                                                                           | <input type="radio"/> | <input type="radio"/> | <input type="radio"/> | <input type="radio"/> |
| b. Eat at least 4 servings of vegetables and/or fruits each day?                                                                                                            | <input type="radio"/> | <input type="radio"/> | <input type="radio"/> | <input type="radio"/> |
| c. Eat or drink 2 servings of milk products ( <i>white or chocolate milk, cheese, yogurt, milk puddings or milk substitutes such as fortified soy beverages</i> ) each day? | <input type="radio"/> | <input type="radio"/> | <input type="radio"/> | <input type="radio"/> |
| d. Eat meals together with the family?                                                                                                                                      | <input type="radio"/> | <input type="radio"/> | <input type="radio"/> | <input type="radio"/> |

Please fill in the circles like this ● or ⊗.

## SECTION B: EARLY YEARS EXPERIENCES

| 8. In the years before your child started Junior Infants how often did your child attend:    | Once a Week or more   | Once a Month          | 3 or 4 Times a Year   | Once a Year           | Not at All            |
|----------------------------------------------------------------------------------------------|-----------------------|-----------------------|-----------------------|-----------------------|-----------------------|
| a. Play-based children's programmes (e.g. drop-ins, Parent and Toddler Group, Family Centre) | <input type="radio"/> |
| b. Literacy and family reading programs (e.g. story times, etc)                              | <input type="radio"/> |
| c. Children's Club (Beavers, Ladybirds, Boys and Girls Club)                                 | <input type="radio"/> |
| d. Music, Arts or Dance programmes                                                           | <input type="radio"/> |
| e. Visited a public library                                                                  | <input type="radio"/> |
| f. Visited a book shop                                                                       | <input type="radio"/> |
| g. Cultural/language/ethnic programmes                                                       | <input type="radio"/> |

| 9. In the years before your child started Junior Infants, did your child get help from any of the following services: | Yes                   | No                    | On waiting list for assessment | On waiting list for services |
|-----------------------------------------------------------------------------------------------------------------------|-----------------------|-----------------------|--------------------------------|------------------------------|
| a. Speech and Language Services                                                                                       | <input type="radio"/> | <input type="radio"/> | <input type="radio"/>          | <input type="radio"/>        |
| b. Blind or Low Vision Services                                                                                       | <input type="radio"/> | <input type="radio"/> | <input type="radio"/>          | <input type="radio"/>        |
| c. Occupational or Physical Therapy                                                                                   | <input type="radio"/> | <input type="radio"/> | <input type="radio"/>          | <input type="radio"/>        |
| d. Hearing Services                                                                                                   | <input type="radio"/> | <input type="radio"/> | <input type="radio"/>          | <input type="radio"/>        |
| e. Programmes / Services for Behavioural Issues                                                                       | <input type="radio"/> | <input type="radio"/> | <input type="radio"/>          | <input type="radio"/>        |
| f. Programmes / Services for Developmental Issues                                                                     | <input type="radio"/> | <input type="radio"/> | <input type="radio"/>          | <input type="radio"/>        |
| g. Mental Health Programmes / Services                                                                                | <input type="radio"/> | <input type="radio"/> | <input type="radio"/>          | <input type="radio"/>        |
| h. Programs / Services for English as a Second Language                                                               | <input type="radio"/> | <input type="radio"/> | <input type="radio"/>          | <input type="radio"/>        |

| 10. In the years before your child started Junior Infants, were you unable to access services to help your child because of any of the following reasons: | YES                   | NO                    |
|-----------------------------------------------------------------------------------------------------------------------------------------------------------|-----------------------|-----------------------|
| a. Wait list was too long                                                                                                                                 | <input type="radio"/> | <input type="radio"/> |
| b. Cost was too much                                                                                                                                      | <input type="radio"/> | <input type="radio"/> |
| c. Didn't have information about services                                                                                                                 | <input type="radio"/> | <input type="radio"/> |
| d. Didn't know services were available                                                                                                                    | <input type="radio"/> | <input type="radio"/> |
| e. No services near where I live                                                                                                                          | <input type="radio"/> | <input type="radio"/> |
| f. No way to get there (no car, no buses, cost)                                                                                                           | <input type="radio"/> | <input type="radio"/> |
| h. Times did not work for me                                                                                                                              | <input type="radio"/> | <input type="radio"/> |
| i. Services were not available in my language                                                                                                             | <input type="radio"/> | <input type="radio"/> |
| j. Other, please tell us: _____                                                                                                                           | <input type="radio"/> | <input type="radio"/> |

Please fill in the circles like this ● or ⊗.

## SECTION C: CHILD CARE

For the next few questions, we are asking about the MAIN type of child care you used. You may have used more than one type of child care but select the one that you consider to be your main child care provider. Do not include babysitters you used occasionally. Do not include pre-school.

11. For EACH age period, what was your MAIN type of care? Please give one answer for each age. If your child was NOT in regular child care during a certain age period, please use the answer Parent Care Only.

| Age of Child                                         | Parent Care Only      | Unpaid care (eg. relative or friend) | Paid care in your home | Paid care in someone's home | Care in a centre / crèche |
|------------------------------------------------------|-----------------------|--------------------------------------|------------------------|-----------------------------|---------------------------|
| 0 to 12 months (infant care)                         | <input type="radio"/> | <input type="radio"/>                | <input type="radio"/>  | <input type="radio"/>       | <input type="radio"/>     |
| 1 yr up to 1 yr and 6 months (1.5 yrs) (infant care) | <input type="radio"/> | <input type="radio"/>                | <input type="radio"/>  | <input type="radio"/>       | <input type="radio"/>     |
| 1.5 years up to 2.5 years (toddler care)             | <input type="radio"/> | <input type="radio"/>                | <input type="radio"/>  | <input type="radio"/>       | <input type="radio"/>     |
| 2.5 yrs up to 4 yrs (preschooler care)               | <input type="radio"/> | <input type="radio"/>                | <input type="radio"/>  | <input type="radio"/>       | <input type="radio"/>     |
| 4 yrs up to 6 yrs (school age care)                  | <input type="radio"/> | <input type="radio"/>                | <input type="radio"/>  | <input type="radio"/>       | <input type="radio"/>     |

12. On average, how many hours per week IN TOTAL did your child spend in your MAIN child care? If your child was NOT in regular child care during a certain age period, please use the answer None - Parent Care Only.

| Age of Child                                         | None - Parent Care Only | Less than 20 hours per week | 20 - 30 hours per week | 31 - 40 hours per week | More than 40 hours per week |
|------------------------------------------------------|-------------------------|-----------------------------|------------------------|------------------------|-----------------------------|
| 0 to 12 months (infant care)                         | <input type="radio"/>   | <input type="radio"/>       | <input type="radio"/>  | <input type="radio"/>  | <input type="radio"/>       |
| 1 yr up to 1 yr and 6 months (1.5 yrs) (infant care) | <input type="radio"/>   | <input type="radio"/>       | <input type="radio"/>  | <input type="radio"/>  | <input type="radio"/>       |
| 1.5 years up to 2.5 years (toddler care)             | <input type="radio"/>   | <input type="radio"/>       | <input type="radio"/>  | <input type="radio"/>  | <input type="radio"/>       |
| 2.5 yrs up to 4 yrs (preschooler care)               | <input type="radio"/>   | <input type="radio"/>       | <input type="radio"/>  | <input type="radio"/>  | <input type="radio"/>       |
| 4 yrs up to 6 yrs (school age care)                  | <input type="radio"/>   | <input type="radio"/>       | <input type="radio"/>  | <input type="radio"/>  | <input type="radio"/>       |

Please fill in the circles like this ● or ⊗.

## SECTION D: PRE-SCHOOL AND SCHOOL

|                                                                             | Yes                   | No                    |
|-----------------------------------------------------------------------------|-----------------------|-----------------------|
| 13. In the year before starting school, did your child attend a pre-school? | <input type="radio"/> | <input type="radio"/> |
| 13. a. If yes, where _____                                                  |                       |                       |

| 14. We would like to know more about your family's experience with the Junior Infants. | Strongly Disagree     | Disagree              | Agree                 | Strongly Agree        |
|----------------------------------------------------------------------------------------|-----------------------|-----------------------|-----------------------|-----------------------|
| a. My child is excited about learning                                                  | <input type="radio"/> | <input type="radio"/> | <input type="radio"/> | <input type="radio"/> |
| b. As a parent, I feel welcome in my child's school                                    | <input type="radio"/> | <input type="radio"/> | <input type="radio"/> | <input type="radio"/> |
| c. My child is able to manage the school day.                                          | <input type="radio"/> | <input type="radio"/> | <input type="radio"/> | <input type="radio"/> |

| 15. Since the beginning of this school year, have you:                                               | Never                 | Once or Twice         | Three or More Times   |
|------------------------------------------------------------------------------------------------------|-----------------------|-----------------------|-----------------------|
| a. Attended a parent-teacher meeting?                                                                | <input type="radio"/> | <input type="radio"/> | <input type="radio"/> |
| b. Attended a general school meeting (e.g. open meeting, parents council meeting)                    | <input type="radio"/> | <input type="radio"/> | <input type="radio"/> |
| c. Attended a school or class event (e.g. school play or concert)                                    | <input type="radio"/> | <input type="radio"/> | <input type="radio"/> |
| d. Volunteered in the school? (e.g. helped in the library, helped with a fundraiser or school event) | <input type="radio"/> | <input type="radio"/> | <input type="radio"/> |

## SECTION E: YOU AND YOUR CHILD

| 16. In the PAST 7 DAYS, have you or someone close to your child done the following things with your child?                 | Yes, Everyday         | Yes, Many Times       | Yes, Once or Twice    | No                    |
|----------------------------------------------------------------------------------------------------------------------------|-----------------------|-----------------------|-----------------------|-----------------------|
| a. Played simple maths games (cards, counting, puzzles, board games)                                                       | <input type="radio"/> | <input type="radio"/> | <input type="radio"/> | <input type="radio"/> |
| b. Sang songs or said rhymes                                                                                               | <input type="radio"/> | <input type="radio"/> | <input type="radio"/> | <input type="radio"/> |
| c. Told or read him/her a story                                                                                            | <input type="radio"/> | <input type="radio"/> | <input type="radio"/> | <input type="radio"/> |
| d. Worked on arts, crafts or drawing with him/her                                                                          | <input type="radio"/> | <input type="radio"/> | <input type="radio"/> | <input type="radio"/> |
| e. Worked on the sounds of letters                                                                                         | <input type="radio"/> | <input type="radio"/> | <input type="radio"/> | <input type="radio"/> |
| f. Helped with printing letters, numbers or child's name                                                                   | <input type="radio"/> | <input type="radio"/> | <input type="radio"/> | <input type="radio"/> |
| g. Done household chores together like cooking, cleaning, putting away toys, setting the table, caring for pets, gardening | <input type="radio"/> | <input type="radio"/> | <input type="radio"/> | <input type="radio"/> |

Please fill in the circles like this ● or ⊗.

|                                                                                                              |                       |                       |
|--------------------------------------------------------------------------------------------------------------|-----------------------|-----------------------|
| 17. Have you ever attended a class, workshop, programme or event meant to help you in your role as a parent? | Yes                   | No                    |
|                                                                                                              | <input type="radio"/> | <input type="radio"/> |

| 18. In the past 12 months, how often has your child:                                                                   | Once a Week or more   | Once a Month          | 3 or 4 Times a Year   | Once a Year           | Not at All            |
|------------------------------------------------------------------------------------------------------------------------|-----------------------|-----------------------|-----------------------|-----------------------|-----------------------|
| a. Played a sport WITH a coach or instructor, outside of school activities (e.g., swimming lessons, GAA, hockey, etc.) | <input type="radio"/> |
| b. Played a sport or done physical activities WITHOUT a coach or instructor (e.g. cycling, skate-boarding, etc.)       | <input type="radio"/> |

|                                                                                                                     |                         |                       |                       |                       |                       |
|---------------------------------------------------------------------------------------------------------------------|-------------------------|-----------------------|-----------------------|-----------------------|-----------------------|
| 19. In a typical school day, how many hours does your child watch TV, use the computer or play video games at home? | 5 or more hours per day | 4 hours per day       | 3 hours per day       | 2 hours per day       | One Hour or less      |
|                                                                                                                     | <input type="radio"/>   | <input type="radio"/> | <input type="radio"/> | <input type="radio"/> | <input type="radio"/> |

|                                                                             |                       |                       |                       |                       |                       |
|-----------------------------------------------------------------------------|-----------------------|-----------------------|-----------------------|-----------------------|-----------------------|
| 20. On a typical school night, how many hours of sleep does your child get? | Less than 8 hours     | 8 to 10 hours         | 11 to 12 hours        | 13 to 14 hours        | More than 14 hours    |
|                                                                             | <input type="radio"/> |

## SECTION 6: YOUR COMMUNITY

|                                                                                                                |                       |                       |                       |
|----------------------------------------------------------------------------------------------------------------|-----------------------|-----------------------|-----------------------|
| 21. Please tell us about your neighbourhood.                                                                   | True                  | Sometimes True        | Not True              |
| a. It is safe to walk alone in my neighbourhood after dark.                                                    | <input type="radio"/> | <input type="radio"/> | <input type="radio"/> |
| b. It is safe for children to play outside during the day in my neighbourhood.                                 | <input type="radio"/> | <input type="radio"/> | <input type="radio"/> |
| c. There are safe parks, playgrounds and play spaces in my neighbourhood.                                      | <input type="radio"/> | <input type="radio"/> | <input type="radio"/> |
| d. If there is a problem around here, the neighbours get together and deal with it.                            | <input type="radio"/> | <input type="radio"/> | <input type="radio"/> |
| e. There are adults in my neighbourhood that children can look up to.                                          | <input type="radio"/> | <input type="radio"/> | <input type="radio"/> |
| f. People around here are willing to help their neighbours.                                                    | <input type="radio"/> | <input type="radio"/> | <input type="radio"/> |
| g. You can count on adults in my neighbourhood to watch out that children are safe and don't get into trouble. | <input type="radio"/> | <input type="radio"/> | <input type="radio"/> |
| h. When I'm away from home, I know that my neighbours will keep their eyes open for possible trouble.          | <input type="radio"/> | <input type="radio"/> | <input type="radio"/> |

Please fill in the circles like this ● or ⊗.

| 22. Do you have access to the following places in your community? Access might mean walking, driving your car a short distance or taking the bus. | Yes                   | No                    | Don't know            |
|---------------------------------------------------------------------------------------------------------------------------------------------------|-----------------------|-----------------------|-----------------------|
| a. Public park or sports grounds                                                                                                                  | <input type="radio"/> | <input type="radio"/> | <input type="radio"/> |
| b. Library                                                                                                                                        | <input type="radio"/> | <input type="radio"/> | <input type="radio"/> |
| c. Shopping centre                                                                                                                                | <input type="radio"/> | <input type="radio"/> | <input type="radio"/> |
| d. Community centre                                                                                                                               | <input type="radio"/> | <input type="radio"/> | <input type="radio"/> |
| e. School                                                                                                                                         | <input type="radio"/> | <input type="radio"/> | <input type="radio"/> |
| f. Grocery store                                                                                                                                  | <input type="radio"/> | <input type="radio"/> | <input type="radio"/> |

| 23. Do you regularly join in the activities of any of the following types of organisation?                                                 | Yes                   | No                    |
|--------------------------------------------------------------------------------------------------------------------------------------------|-----------------------|-----------------------|
| a. Sports clubs (Parish, GAA, Golf, Other), gym, exercise classes                                                                          | <input type="radio"/> | <input type="radio"/> |
| b. Political parties, trade unions, environmental groups                                                                                   | <input type="radio"/> | <input type="radio"/> |
| c. Parent-teacher associations, tenants groups, residents groups, neighbourhood watch, youth groups, other community action groups         | <input type="radio"/> | <input type="radio"/> |
| d. Church or other religious/parish groups, charitable or voluntary organisations (e.g. collecting for charity, helping the sick, elderly) | <input type="radio"/> | <input type="radio"/> |
| e. Evening classes, arts or music groups, education activities                                                                             | <input type="radio"/> | <input type="radio"/> |
| f. Social clubs (e.g. mother & toddler group, club, women's groups, elderly group)                                                         | <input type="radio"/> | <input type="radio"/> |
| g. Other, please tell us: _____                                                                                                            | <input type="radio"/> | <input type="radio"/> |

| 24. How many people are so close to you that can count on them if you have serious personal problems? |                       |                       |                       |  |
|-------------------------------------------------------------------------------------------------------|-----------------------|-----------------------|-----------------------|--|
| None                                                                                                  | 1 or 2                | 3 to 5                | More than 5           |  |
| <input type="radio"/>                                                                                 | <input type="radio"/> | <input type="radio"/> | <input type="radio"/> |  |

| 25. How much friendly interest do people in your neighbourhood take in what you are doing? |                       |                       |                       |                       |
|--------------------------------------------------------------------------------------------|-----------------------|-----------------------|-----------------------|-----------------------|
| A lot                                                                                      | Some                  | Uncertain             | Little                | None                  |
| <input type="radio"/>                                                                      | <input type="radio"/> | <input type="radio"/> | <input type="radio"/> | <input type="radio"/> |

| 26. How easy is it to get practical help from neighbours if you should need it? |                       |                       |                       |                       |
|---------------------------------------------------------------------------------|-----------------------|-----------------------|-----------------------|-----------------------|
| Very easy                                                                       | Easy                  | Possible              | Difficult             | Very Difficult        |
| <input type="radio"/>                                                           | <input type="radio"/> | <input type="radio"/> | <input type="radio"/> | <input type="radio"/> |

Please fill in the circles like this ● or ⊗.

27. Can you tell me how much you agree or disagree with this statement: "If I was experiencing mental health problems I wouldn't want people knowing about it"

Agree strongly

Agree slightly

Neither agree nor disagree

Disagree slightly

Disagree strongly

## SECTION H: BACKGROUND INFORMATION

To help us understand the families who are participating in this study, we would like to ask a few questions about yourself, your family and your household.

28. Are you the child's:

Mother

Father

Other (please tell us)

29. Please tell us if your household has had the following items and if not, is it because you couldn't afford it or for another reason.

Yes

No,  
Cannot  
afford

No,  
other  
reason

- |                                                                                                                 |                       |                       |                       |
|-----------------------------------------------------------------------------------------------------------------|-----------------------|-----------------------|-----------------------|
| a. Does your household eat meals with meat, chicken, fish (or vegetarian equivalent) at least every second day? | <input type="radio"/> | <input type="radio"/> | <input type="radio"/> |
| b. Does your household have a roast joint (or its equivalent) at least once a week?                             | <input type="radio"/> | <input type="radio"/> | <input type="radio"/> |
| c. Do household members buy new rather than second-hand clothes?                                                | <input type="radio"/> | <input type="radio"/> | <input type="radio"/> |
| d. Does each household member possess a warm waterproof coat?                                                   | <input type="radio"/> | <input type="radio"/> | <input type="radio"/> |
| e. Does each household member possess two pairs of strong shoes?                                                | <input type="radio"/> | <input type="radio"/> | <input type="radio"/> |
| f. Does the household replace any worn out furniture?                                                           | <input type="radio"/> | <input type="radio"/> | <input type="radio"/> |
| g. Does the household keep the home adequately warm?                                                            | <input type="radio"/> | <input type="radio"/> | <input type="radio"/> |
| h. Does the household have family or friends for a drink or meal once a month?                                  | <input type="radio"/> | <input type="radio"/> | <input type="radio"/> |
| i. Does the household buy presents for family or friends at least once a year?                                  | <input type="radio"/> | <input type="radio"/> | <input type="radio"/> |



Please fill in the circles like this ● or ⊗.

|                                                                       |                       |                       |                       |                       |                       |
|-----------------------------------------------------------------------|-----------------------|-----------------------|-----------------------|-----------------------|-----------------------|
| 30. With how much difficulty or ease does your family make ends meet? |                       |                       |                       |                       |                       |
| With great difficulty                                                 | With difficulty       | With some difficulty  | Fairly easily         | Easily                | Very easily           |
| <input type="radio"/>                                                 | <input type="radio"/> | <input type="radio"/> | <input type="radio"/> | <input type="radio"/> | <input type="radio"/> |

|                                                                                                                            |                       |                       |                       |                       |                       |
|----------------------------------------------------------------------------------------------------------------------------|-----------------------|-----------------------|-----------------------|-----------------------|-----------------------|
| 31. Think back to when you were 16 years old, with how much difficulty or ease did your family at the time make ends meet? |                       |                       |                       |                       |                       |
| With great difficulty                                                                                                      | With difficulty       | With some difficulty  | Fairly easily         | Easily                | Very easily           |
| <input type="radio"/>                                                                                                      | <input type="radio"/> | <input type="radio"/> | <input type="radio"/> | <input type="radio"/> | <input type="radio"/> |

|                          |                       |
|--------------------------|-----------------------|
| 32. Do you live in a     |                       |
| House                    | <input type="radio"/> |
| Apartment/ flat / bedsit | <input type="radio"/> |
| Other, tell us _____     | <input type="radio"/> |

|                                                                        |                       |
|------------------------------------------------------------------------|-----------------------|
| 33. Which of the following best describes your home?                   |                       |
| Owner occupied (with or without a mortgage)                            | <input type="radio"/> |
| Being purchased from a Local Authority under a Tenant Purchase Scheme  | <input type="radio"/> |
| Rented from a Local Authority                                          | <input type="radio"/> |
| Rented from a Voluntary Body                                           | <input type="radio"/> |
| Rented from a Private Landlord                                         | <input type="radio"/> |
| Living with and <u>paying rent</u> to your or your partner's parent(s) | <input type="radio"/> |
| Occupied free of rent with your or your partner's parent(s)            | <input type="radio"/> |
| Occupied free of rent from your or your partner's job                  | <input type="radio"/> |

|                                                             | English               | Irish                 | Polish                | Latvian               | Other (please tell us)      |
|-------------------------------------------------------------|-----------------------|-----------------------|-----------------------|-----------------------|-----------------------------|
| 34. What language do YOU speak most often at home?          | <input type="radio"/> _____ |
| 35. What language does YOUR CHILD speak most often at home? | <input type="radio"/> _____ |

Please fill in the circles like this ● or ⊗.

| 36. Which of the following best describes your family? | One Parent            | Two Parent            | Other (please tell us)      |
|--------------------------------------------------------|-----------------------|-----------------------|-----------------------------|
|                                                        | <input type="radio"/> | <input type="radio"/> | <input type="radio"/> _____ |

36.(a) What is the child's mothers occupation? \_\_\_\_\_

(b) How many hours per week does she work? \_\_\_\_\_

37. (a) What is the child's father's occupation? \_\_\_\_\_

(b) How many hours per week does he work? \_\_\_\_\_

38. What is the mother's highest level of education? Please fill in one answer.

Primary or less <sub>1</sub>

Intermediate/ Junior/ Group Certificate or equivalent <sub>2</sub>

Leaving Certificate or equivalent <sub>3</sub>

Diploma / Certificate <sub>4</sub>

University graduate Degree <sub>5</sub>

39. What is the father's highest level of education? Please fill in one answer.

Primary or less <sub>1</sub>

Intermediate/ Junior/ Group Certificate or equivalent <sub>2</sub>

Leaving Certificate or equivalent <sub>3</sub>

Diploma / Certificate <sub>4</sub>

University graduate Degree <sub>5</sub>

**Thank you very much for your participation.**

STROBE 2007 (v4) Statement—Checklist of items that should be included in reports of *cross-sectional studies*

| Section/Topic                | Item # | Recommendation                                                                                                                                                                       | Reported on page # |
|------------------------------|--------|--------------------------------------------------------------------------------------------------------------------------------------------------------------------------------------|--------------------|
| Title and abstract           | 1      | (a) Indicate the study's design with a commonly used term in the title or the abstract                                                                                               | 1                  |
|                              |        | (b) Provide in the abstract an informative and balanced summary of what was done and what was found                                                                                  | 1                  |
| <b>Introduction</b>          |        |                                                                                                                                                                                      |                    |
| Background/rationale         | 2      | Explain the scientific background and rationale for the investigation being reported                                                                                                 | 1                  |
| Objectives                   | 3      | State specific objectives, including any prespecified hypotheses                                                                                                                     | 1                  |
| <b>Methods</b>               |        |                                                                                                                                                                                      |                    |
| Study design                 | 4      | Present key elements of study design early in the paper                                                                                                                              | 2                  |
| Setting                      | 5      | Describe the setting, locations, and relevant dates, including periods of recruitment, exposure, follow-up, and data collection                                                      | 1                  |
| Participants                 | 6      | (a) Give the eligibility criteria, and the sources and methods of selection of participants                                                                                          | 2                  |
| Variables                    | 7      | Clearly define all outcomes, exposures, predictors, potential confounders, and effect modifiers. Give diagnostic criteria, if applicable                                             | 2–3                |
| Data sources/<br>measurement | 8*     | For each variable of interest, give sources of data and details of methods of assessment (measurement). Describe comparability of assessment methods if there is more than one group | 2–3                |
| Bias                         | 9      | Describe any efforts to address potential sources of bias                                                                                                                            | 3–4                |
| Study size                   | 10     | Explain how the study size was arrived at                                                                                                                                            | 2                  |
| Quantitative variables       | 11     | Explain how quantitative variables were handled in the analyses. If applicable, describe which groupings were chosen and why                                                         | 3                  |
| Statistical methods          | 12     | (a) Describe all statistical methods, including those used to control for confounding                                                                                                | 3                  |
|                              |        | (b) Describe any methods used to examine subgroups and interactions                                                                                                                  | 3–4                |
|                              |        | (c) Explain how missing data were addressed                                                                                                                                          | 3                  |
|                              |        | (d) If applicable, describe analytical methods taking account of sampling strategy                                                                                                   | n/a                |
|                              |        | (e) Describe any sensitivity analyses                                                                                                                                                | n/a                |
| <b>Results</b>               |        |                                                                                                                                                                                      |                    |

|                          |     |                                                                                                                                                                                                              |              |
|--------------------------|-----|--------------------------------------------------------------------------------------------------------------------------------------------------------------------------------------------------------------|--------------|
| Participants             | 13* | (a) Report numbers of individuals at each stage of study—eg numbers potentially eligible, examined for eligibility, confirmed eligible, included in the study, completing follow-up, and analysed            | 1-2          |
|                          |     | (b) Give reasons for non-participation at each stage                                                                                                                                                         | 2            |
|                          |     | (c) Consider use of a flow diagram                                                                                                                                                                           | n/a          |
| Descriptive data         | 14* | (a) Give characteristics of study participants (eg demographic, clinical, social) and information on exposures and potential confounders                                                                     | 2            |
|                          |     | (b) Indicate number of participants with missing data for each variable of interest                                                                                                                          | Tables       |
| Outcome data             | 15* | Report numbers of outcome events or summary measures                                                                                                                                                         | 3-4          |
| Main results             | 16  | (a) Give unadjusted estimates and, if applicable, confounder-adjusted estimates and their precision (eg, 95% confidence interval). Make clear which confounders were adjusted for and why they were included | 4 and tables |
|                          |     | (b) Report category boundaries when continuous variables were categorized                                                                                                                                    | 3 and tables |
|                          |     | (c) If relevant, consider translating estimates of relative risk into absolute risk for a meaningful time period                                                                                             | n/a          |
| Other analyses           | 17  | Report other analyses done—eg analyses of subgroups and interactions, and sensitivity analyses                                                                                                               | 4-5          |
| <b>Discussion</b>        |     |                                                                                                                                                                                                              |              |
| Key results              | 18  | Summarise key results with reference to study objectives                                                                                                                                                     | 5-6          |
| Limitations              | 19  | Discuss limitations of the study, taking into account sources of potential bias or imprecision. Discuss both direction and magnitude of any potential bias                                                   | 5-6          |
| Interpretation           | 20  | Give a cautious overall interpretation of results considering objectives, limitations, multiplicity of analyses, results from similar studies, and other relevant evidence                                   | 6            |
| Generalisability         | 21  | Discuss the generalisability (external validity) of the study results                                                                                                                                        | 6            |
| <b>Other information</b> |     |                                                                                                                                                                                                              |              |
| Funding                  | 22  | Give the source of funding and the role of the funders for the present study and, if applicable, for the original study on which the present article is based                                                | 1            |

\*Give information separately for cases and controls in case-control studies and, if applicable, for exposed and unexposed groups in cohort and cross-sectional studies.

**Note:** An Explanation and Elaboration article discusses each checklist item and gives methodological background and published examples of transparent reporting. The STROBE checklist is best used in conjunction with this article (freely available on the Web sites of PLoS Medicine at <http://www.plosmedicine.org/>, Annals of Internal Medicine at <http://www.annals.org/>, and Epidemiology at <http://www.epidem.com/>). Information on the STROBE Initiative is available at [www.strobe-statement.org](http://www.strobe-statement.org).



**Determinants of Vulnerability in Early Childhood Development in Ireland – a Population Level Study**

|                                 |                                                                                                                                                                                                                                                                                                               |
|---------------------------------|---------------------------------------------------------------------------------------------------------------------------------------------------------------------------------------------------------------------------------------------------------------------------------------------------------------|
| Journal:                        | <i>BMJ Open</i>                                                                                                                                                                                                                                                                                               |
| Manuscript ID:                  | bmjopen-2012-002387.R2                                                                                                                                                                                                                                                                                        |
| Article Type:                   | Research                                                                                                                                                                                                                                                                                                      |
| Date Submitted by the Author:   | 30-Mar-2013                                                                                                                                                                                                                                                                                                   |
| Complete List of Authors:       | Curtin, Margaret; University College Cork, Epidemiology and Public Health<br>Madden, Jamie; University College Cork, Epidemiology and Public Health<br>Staines, Anthony; Dublin City University, School of Nursing and Human Sciences<br>Perry, Ivan; University College Cork, Epidemiology and Public Health |
| <b>Primary Subject Heading</b>: | Public health                                                                                                                                                                                                                                                                                                 |
| Secondary Subject Heading:      | Epidemiology, Paediatrics                                                                                                                                                                                                                                                                                     |
| Keywords:                       | Community child health < PAEDIATRICS, Child development, Social determinants                                                                                                                                                                                                                                  |
|                                 |                                                                                                                                                                                                                                                                                                               |

SCHOLARONE™  
Manuscripts

# Determinants of Vulnerability in Early Childhood Development in Ireland – a Population Level Study

<sup>1</sup>Margaret Curtin

<sup>1</sup>Jamie Madden

<sup>2</sup>Anthony Staines

<sup>1</sup>Ivan J. Perry

<sup>1</sup>Department of Epidemiology and Public Health, University College Cork, Ireland

<sup>2</sup>School of Nursing and Human Sciences, Dublin City University, Ireland

Corresponding author: Margaret Curtin

Department of Epidemiology and Public Health,  
Floor 4, Western Gateway Building,  
University College Cork,  
Cork, Ireland.

Telephone: +353 86 3219121

Fax: +353 21 4205469

e-mail: [m.curtin@ucc.ie](mailto:m.curtin@ucc.ie)

**Key words:** Child development; pre-school child; population health; epidemiological measurement

**Word Count:** 3991

## ARTICLE SUMMARY

### Article focus

- This study demonstrates that significant population level variation exists in healthy child development in Ireland.
- The Early Development Instrument (EDI) is a unique, well-validated population level instrument which allows us to track all five domains of early development and identify populations of children at risk.
- When used in conjunction with a parental questionnaire factors which impact on child development at the child and family level can be identified.

### Key Messages

- A direct population level evidence base on normal child development is needed both as an indicator of child health and a predictor of future outcomes.
- Three child-level demographic factors (age, gender and language) accounted for over half of the population level risk of developmental vulnerability, reinforcing the need for universal early childhood programmes which are cognisant of these variations.

### Strengths and limitations of the study

- This is the first peer-reviewed population level study published in Europe assessing child development outcomes across multiple domains using the EDI.
- The study identifies proximal factors associated with child development, yet children and families do not live in a vacuum. Further research is needed to identify associated factors in the broader socio-cultural environment.

### Abstract:

Objectives: Early childhood development strongly influences life-long health. The Early Development Instrument (EDI) is a well validated population-level measure of five developmental domains (physical health and well-being, social competence, emotional maturity, language and cognitive skills, and communication skills and general knowledge) at school entry age. The aim of this study was to explore the potential of the EDI as an indicator of early development in Ireland.

Design: A cross-sectional design was used.

Setting: The study was conducted in 42 out of 47 primary schools in a major Irish urban centre.

Participants: EDI (teacher completed) scores were calculated for 1,243 children in their first year of full-time education. Contextual data from a subset of 865 children was collected using a parental questionnaire.

Primary and secondary outcome measures: Children scoring in the lowest 10% of the population in one or more domains were deemed 'developmentally vulnerable'. Scores were correlated with contextual data from the parental questionnaire.

Results: In the sample population 29% of children were not developmentally ready to engage in school. Factors associated with increased risk of vulnerability were being male OR=2.1 (CI =1.6 to 2.7); under 5 years OR = 1.5 (CI = 1.1 to 2.1); and having English as a second language OR = 3.7 (CI = 2.6 to 5.2). Adjusted for these demographics, low birth weight, poor parent/child interaction and mother's lower level of education showed the most significant odds ratios for developmental

1  
2  
3  
4  
5  
6  
7  
8  
9  
10  
11  
12  
13  
14  
15  
16  
17  
18  
19  
20  
21  
22  
23  
24  
25  
26  
27  
28  
29  
30  
31  
32  
33  
34  
35  
36  
37  
38  
39  
40  
41  
42  
43  
44  
45  
46  
47  
48  
49  
50  
51  
52  
53  
54  
55  
56  
57  
58  
59  
60

vulnerability. Calculating Population Attributable Fractions, the greatest population-level risk factors were being male (35%), mother’s education (27%) and having English as a second language (12%). Conclusion: The EDI and linked parental questionnaires are promising indicators of the extent, distribution and determinants of developmental vulnerability among children in their first year of primary school in Ireland.

For peer review only



## BACKGROUND

There is significant epidemiological evidence that early childhood development (from gestation to age six) strongly influences life-long health trajectories<sup>1</sup>. Indeed, major public health problems such as obesity, heart-disease and mental health problems can be seen to have roots in early childhood<sup>2-3</sup>. This results from a complex interplay between genetic makeup, in utero development, and both pre and postnatal environmental factors, all of which influence brain development in the first five years of life<sup>4</sup>.

There is also evidence of a social gradient in child development<sup>5</sup>, with children from poorer backgrounds doing less well in school and entering into an intergenerational cycle of reduced employment opportunities, higher fertility and health inequalities<sup>6</sup>. The long term social and economic gain of investing in the early years is also recognised<sup>7</sup>. Kershaw estimates that the cost of preventable early childhood vulnerability to the Canadian economy is between \$2.2 and \$3.4 trillion<sup>8</sup>.

The challenge for public health, is to give due consideration to early childhood development both as an indicator of child health and as a predictor of future outcomes. Child development has been recognised as a key social determinant<sup>9-10</sup>. Moreover, the relatively large numbers of children with less pronounced development delay are a potentially greater burden than a small number of children at high risk<sup>11</sup> leading to a need for a population health approach<sup>12</sup>. Yet, measurement of child development is usually in the form of a diagnostic which aims to identify children at greatest risk and provide appropriate individual care, leaving a dearth of research evidence on which to build population level strategies<sup>13-14</sup>. In this context a direct population level evidence base on normal child development is needed.

The Early Development Instrument (EDI) is an internationally accepted, validated tool which has the potential to provide such an evidence base<sup>15</sup>. In Australia the EDI (AEDI) has been used universally as a census of child development and has revealed significant variation across states and territories<sup>16</sup>. While the EDI has been implemented at a population level in Scotland, Sweden and Kosovo this is the first peer reviewed population-level study published in Europe assessing child development outcomes across multiple domains, and using the EDI and linked parental questionnaire. The overall objective of the study was to ascertain the proportion of children who were developmentally ready for school in a representative sample of schools in a major urban centre in Ireland using the EDI and to examine associated factors. The study also aimed to assess the feasibility of implementing the EDI and its performance in this setting.

Ireland is a largely homogenous country with 85.8% of the population ethnically White Irish and a further 9.3% of other white ethnic background, primarily British<sup>17</sup>. Cork is one of five major urban centres. While all of these centres are comprised of areas of concentrated affluence and disadvantage, there are similar overall rates of key socio-economic indicators including unemployment, lone-parent families and education<sup>18</sup>. There is a total population of 64,937 five year olds. A minority (1.1%) of Irish children are members of the Traveller Community. Moreover, 19.5% are considered at risk of poverty and 8% live in consistent poverty<sup>19</sup>. The education system is static throughout the country.

## METHODS

1  
2  
3 This observational study of child development was implemented with children in their first year of  
4 formal education (in Ireland this is referred to as 'Junior Infants') in 42 of the 47 primary schools in  
5 Cork city. Five schools in the city declined to take part. These declining schools were representative  
6 of a cross-section of schools in Cork - one boys school, one girls school, one large mixed, middle  
7 income school, one designated disadvantaged school and one Irish speaking school – and their  
8 omission would not have affected the representativeness of the demographic composition of the  
9 study. A further four schools agreed to participate in the study but chose not to administer the  
10 parental questionnaire as they believed it would put undue pressure on parents with literacy  
11 challenges. These were all designated disadvantaged schools and this has contributed to the under-  
12 representation of the most vulnerable children in the parental study.  
13  
14  
15

16 All eligible children in the participating schools were invited to be included in the study.. Eligibility  
17 criteria were: being in the latter half of the first year of formal education (i.e. having completed A  
18 minimum of 4 to 5 months of education), being known by the teacher for more than one month and  
19 not having left the school.  
20  
21

### 22 **Measurement of Child Development - The Early Development Instrument**

23  
24 Child development at school entry age was measured using the Early Development Instrument (EDI).  
25 This population level measure was designed at the Offord Centre for Child Studies, McMaster  
26 University, Hamilton, Ontario in the late 90s to measure the extent to which children have attained  
27 the physical, social, emotional and cognitive maturity necessary to engage in school activities <sup>20</sup>.  
28 The EDI is a community or population level measure, not an individual screening or diagnostic tool.  
29 The underlying focus is that of a population health approach i.e. small modifications of risk for large  
30 numbers are more effective at producing change than large modifications for small numbers <sup>12</sup>. It  
31 can be retrospective, focusing on early childhood development outcomes; or predictive, informing  
32 school and child-health programmes <sup>20</sup>. The instrument consists of five domains, sixteen sub-  
33 domains and 104 questions. The domains and sub domains are outlined in Table 1.  
34  
35  
36

37 The EDI is a well validated instrument which has had extensive psychometric testing done both in  
38 Canada and Australia <sup>15 20-23</sup>. It has also been proven valid for use in minority populations <sup>24</sup>. In this  
39 Irish study, the EDI had good internally consistency by domains with Cronbach alphas of between 0.8  
40 and 0.96.  
41  
42

### 43 **Parental Questionnaire**

44  
45 In 2003 a parental questionnaire was developed and tested by the Offord Centre to complement the  
46 results of the EDI and provide a deeper population level context to the lives of children <sup>20</sup>. This  
47 questionnaire was adapted to suit the Irish context incorporating validated questions from the  
48 Growing Up in Ireland Study <sup>25</sup> and the SLAN Survey of Lifestyles, Behaviour and Nutrition in Ireland  
49 <sup>26</sup>. It consists of seven sections: child health and development; child care; pre-school; school; family;  
50 neighbourhood; and background information.  
51  
52

### 53 **Data collection**

54  
55 The EDI is a teacher completed questionnaire based on five months observation of the children from  
56 the date when they start school, and was, therefore, implemented in the latter half of the first year  
57 of formal education. Prior to completing the questionnaires, the teachers were given a short  
58  
59  
60

1  
2  
3 training and were each issued with an EDI guide book. Children were not present when the  
4 questionnaire was completed and no individual identifiers were recorded. Each child was assigned  
5 a form ID which was used on both the EDI and Parental Questionnaire.  
6

7  
8 Passive consent was used in line with previous EDI studies in Canada. An information letter was  
9 distributed to all parents by the class teacher two weeks before commencing the study. Parents  
10 were given detailed information on the study and asked to contact the school if they did not want  
11 their child included. A total of seven parents opted not to participate. Ethical approval was granted  
12 by the Clinical Research Ethics Committee of the Cork Teaching Hospitals.  
13

14  
15 The parental questionnaires were distributed in school bags or homework folders. Each parental  
16 pack contained a letter of explanation, questionnaire (again with no individual identifier) and a blank  
17 envelope in which to return the questionnaire sealed to the school. Parents were reassured that  
18 the envelope would not be opened at the school.  
19

### 20 **Developmental scoring**

21  
22 EDI scores were calculated for each developmental domain i.e. Physical Health and Well-being;  
23 Social Competence; Emotional Maturity; Language and Cognitive Development; and Communication  
24 Skills and General Knowledge. All questions had a 2 or 3 point Likert type response format (yes, no,  
25 don't know; very true, sometimes or somewhat true, never or not true, don't know). All responses  
26 had a score of 0 to 10 (2 point answers were scored 0 and 10; 3 point answers were scored 0, 5  
27 and 10). 'Don't know' responses were not scored. Domain scores refer to the child's mean score in  
28 that domain - ranging between 0 and 10. Higher scores indicate better results.  
29  
30

31  
32 Children who scored in the lowest 10% of the study population in one or more of the five domains of  
33 the EDI were classed as 'vulnerable'. The 10% cut off is recommended because it is higher than  
34 typical clinical cut-off's and should therefore include children who may be more difficult to diagnose  
35 <sup>27</sup>. Those scoring in the lowest 10-25% for one or more domains were deemed 'at risk' and children  
36 who scored in the top 75% were 'on track' in that domain. Each domain was scored separately as  
37 children who are vulnerable in one area cannot compensate through competence in another. All  
38 scores were aggregated to the group level. In the absence of an Irish normative sample, to ensure  
39 the validity of the cut-off points, data was also scored against Canadian normative data. There was a  
40 99% correlation between 'vulnerability' using the Irish and Canadian cut-off points. In four of the  
41 five domains there was 100% correlation between vulnerability using the Irish and Canadian cut-off  
42 points.  
43  
44  
45

46  
47 Data from the parental questionnaires was linked to the teacher filled questionnaire using the Form  
48 ID number and the matching was crosschecked using the recorded date of birth and gender.  
49 Questions, again, were constructed in a Likert type response format - yes, no or three to five  
50 response options. Demographic questions on child's date of birth and birth weight were also  
51 included.  
52

### 53 **Explanatory variables**

54  
55 The child's age was calculated from their date of birth and the date on which the form was  
56 completed and reported in years and months. 'Children for whom English is a second language  
57 (ESL)' refers to those reported by the teacher to have a first language other than English. Members  
58  
59  
60

of the Travelling Community were children who were known by school to be part of this Irish ethnic minority group.

'Children identified as special needs' refers to those children who had already been identified as needing special assistance in the classroom. In Ireland this is defined as having a 'Special Education Condition' which has been recognised through a standardised assessment process<sup>28</sup>.

Parental reported birth weight was used to calculate whether the child had a low birth weight i.e. less than 2.5kgs. Parental report of birth weight has been proven to be adequately accurate to be acceptable for research purposes<sup>29</sup>.

Parents were asked how much time (to the nearest hour) the child spent either watching television, using the computer or playing video games on a typical school day. This was coded into '1 or less', 'two to three' and '4 or more' hours.

### Data analysis

SPSS was used to analyse data. Each child's EDI scores were calculated by the Offord Centre for Child Studies in line with international EDI process. Initial analysis involved a cross-tabulation of potential risk items from the teacher completed EDI questionnaire (i.e. gender, age, ESL, pre-school attendance and membership of the Travelling Community) against the child's score in each of the developmental domains.

All further analyses reported here were confined to the sub-group of children for whom parental data was available. Univariate analysis was used to explore factors associated with 'vulnerability' i.e. being in the lowest 10% of the target population in one or more domain. Factors which proved significant ( $p < 0.05$ ) were then entered into logistic regression models to predict likelihood of vulnerability on EDI scores. The first model adjusted for age, gender and ESL. The second model adjusted for all other factors.

Population attributable fractions (PAF) were used to calculate the proportion of risk attributed to each of the factors in the final regression<sup>30-31</sup>. This was calculated using the 'punaf' command in STATA 12 which calculates confidence intervals for PAF, and also for scenario means and their ratio, known as the population unattributable fraction. Punaf uses the method for estimating PAFs recommended by Greenland and Drescher (1993) for cohort and cross-sectional studies<sup>32</sup>.

## RESULTS

EDI questionnaires were distributed to teachers of 1366 children. A total of 1243 (92%) were returned completed and valid. Of these, 45% (n=563) were girls. The average age at which children in the study started school was 4 years and 9 months. The youngest was 3 years 11 months and the oldest 6 years and 1 month.

There was considerable diversity in first language with 12.7% of the children reported to have English as a Second Language (ESL) and 36 different languages spoken. Three percent of the children in the study were members of the Traveller Community. The majority of children (76%) were known by the teacher to have attended preschool in the year before commencing full-time education.

1  
2  
3 In total, 6.6% of children had already been identified as having special needs. The study was  
4 conducted in mainstream primary schools and this number does not, therefore, include those  
5 children in Cork attending Junior Infants equivalent in special schools, who would tend to be more  
6 severely disabled.  
7

8  
9 Parental questionnaires were returned and linked to 865 (63%) valid child questionnaires. The  
10 characteristics of the study population varied somewhat between the overall study and  
11 those who returned the parental questionnaire. In particular, the proportion of children for  
12 whom English was a second language fell from 12.7% in the overall group to 9.8% in those  
13 returning parental questionnaires; for children reported as having special needs, the  
14 proportions were 6.6 and 5.0 % respectively; and for those reported to be members of the  
15 Travelling community, 3.1% and 1.7% respectively. The characteristics of the population who  
16 returned the parental questionnaire and those who did not are compared in Table 2.  
17  
18  
19

### 20 **Distribution of domain scores (Mean and standard error)**

21  
22 Mean scores varied across the EDI domains. However, particular groups of children consistently  
23 scored below the mean in all domains i.e. boys, children who had English as a second language,  
24 members of the Traveller Community, children who had not been to pre-school and those who were  
25 under four years 10 months at the time of the study. This is outlined in Figure 2 with the vertical axis  
26 representing the mean domain score for the study population.  
27  
28

### 29 **Factors associated with vulnerability**

30  
31 Over one quarter (28.6%) of children in the study were developmentally vulnerable (i.e. in the  
32 lowest 10<sup>th</sup> percentile for one or more domains). In total 12% were vulnerable in only one domain,  
33 6% in 2 domains, 5% in 3 domains, 3% in 4 domains and 3% were vulnerable in all 5 domains.  
34  
35

36 The following analysis is based only the subset of the study population (n=865) on whom parental  
37 questionnaires were returned.  
38

39 Factors associated with developmental vulnerability (outlined in Table 3) were being male (odds  
40 ratio [OR] =2.2, 95% confidence interval [CI] = 1.6 – 3.1), ESL (OR = 3.8, CI= 2.4 – 6.1), being under  
41 five years of age at the time of the study (OR = 1.6, CI = 1.1 – 2.4) and low birth weight (OR=2.5,  
42 CI=1.4 – 4.5). When compared with children whose mothers had a university education those with  
43 only primary education (OR= 2.8, CI = 1.3 - 5.8) or secondary level (OR = 1.7, CI = 1.1 - 2.6) showed  
44 higher levels of vulnerability. Children who were never or seldom told stories in the past week and  
45 those who spent more than four hours watching television or playing video games also showed  
46 significantly increased vulnerability.  
47  
48

### 49 **Logistic Regression**

50  
51 Regression analysis was then used to assess the impact of each variable on the odds of being  
52 vulnerable as outlined in Table 4. The first model controlled for being male, having English as a  
53 second language and being under five years of age at the time of EDI completion, the second also  
54 controlled for all other factors. Children whose birth weight was less than 2.5kg were over twice as  
55 likely to be vulnerable. Mother's education showed a graded effect. When controlled for all other  
56  
57  
58  
59  
60

1  
2  
3 variables, children who had not been told or read stories in the past week were over five times as  
4 likely to be vulnerable than those who were told stories every day. In the final model, the amount of  
5 time spent watching television became insignificant.  
6

### 7 8 **Population Attributable Fraction (PAF)**

9  
10 PAF was used to measure the proportion of vulnerability attributed to each of the factors included in  
11 the final regression model (Table 5). Boys were almost three times as likely as girls to be vulnerable  
12 and being male accounted for 35% of the overall vulnerability. English as a second language  
13 accounted for 12%, and mothers education (primary, secondary or diploma) for 27% of vulnerability.  
14 Despite the high risk of vulnerability among children who were not read to (OR 5.3), this only  
15 accounted for 1.7% of the overall vulnerability reflecting its low prevalence in this population.  
16

### 17 18 19 **DISCUSSION**

20 This paper explored the extent to which children in a major urban centre in Ireland have attained the  
21 level of child development necessary to engage fully in the education process. The findings suggest  
22 that, as expected, a significant minority of over one quarter (28.6%) of children in the study were not  
23 developmentally ready to engage in, and thereby benefit fully from school. Clearly these findings  
24 should be interpreted cautiously in light of the current level of development of the EDI in Ireland, in  
25 particular, the lack of data on predictive validity for the EDI in the Irish population. At the same  
26 time, the fundamental issue is not the absolute scores but the unacceptable variation in scores  
27 related to socio-economic, environmental and ecological circumstances.  
28

29  
30  
31 The overall level of developmental vulnerability was consistent with findings from urban areas in  
32 Canada where the EDI has been implemented<sup>1 33-35</sup>. Indeed mean scores across all domains in the  
33 Irish sample were similar to those in the Canadian normative sample. Factors associated with  
34 increased risk of vulnerability at the child level were being male, a younger child, having English as a  
35 second language and low birth weight. Key factors at the family level were mothers education and  
36 reading stories. In the final model, the strongest predictor of vulnerability on EDI scores was story  
37 telling. Children who were never told stories in the past week were over five times as likely to be  
38 vulnerable compared with children who were told stories every day. This supports numerous  
39 studies which show a link between reading stories and literacy development<sup>36</sup> and with broader  
40 aspects of development<sup>37</sup> These are again consistent with findings from Canada, further supporting  
41 the transferability of the instrument between the two jurisdictions<sup>38</sup>  
42  
43  
44

45 The mean scores across all five domains varied between sub-groups of the population. The impact  
46 of age is very clear. Younger children, aged less than 4 years and 10 months scored on average less  
47 well across all the domains. Children who had not attended pre-school also showed below average  
48 scores. However, non- attendance at pre-school can result from a variety of underlying reasons.  
49 Therefore, these scores cannot be attributed solely to the lack of pre-school education. Children  
50 from the Traveller Community also showed lower mean scores across all domains. Traveller children  
51 face a variety of challenges including accommodation in poorly serviced communal sites, greater risk  
52 of low birth weight, ill-health and hospitalisation<sup>39</sup>.  
53  
54  
55

56 Three child-level demographics were strongly associated with vulnerability. Boys, children who start  
57 school at a younger age and those for whom English is a second language were more likely to be  
58  
59  
60

1  
2  
3 vulnerable. PAF illustrates that these three factors account for half of all vulnerability. These  
4 findings are consistent with international studies<sup>34 40</sup>  
5

6 Hertzman describes vulnerability levels of above 15% as an unacceptable level of difficulty at school  
7 entry age<sup>41</sup>. There is considerable debate regarding the expected level of biologically determined  
8 developmental vulnerability. OECD country estimates range between 1.8% and 10.4%<sup>42</sup>. Considering  
9 these expected levels of biological determined developmental delay external factors can be seen to  
10 contribute to major disparities.  
11

### 12 13 **Limitations**

14 The overall study was representative of children in their first year in formal education in Cork city.  
15 However, there was a 63% return rate on the parental questionnaire. While this compares  
16 favourably to other jurisdictions where this method has been used<sup>38</sup>, there are significant  
17 differences between those for whom parental data were available and those for whom it was not.  
18 It is clear that the most vulnerable children were underrepresented in the parental sample.  
19

20 This was the first study using the EDI in Ireland. Therefore, there was limited scope for validity  
21 testing. Comparisons with Canadian normative data, internal validity testing and qualitative work  
22 with teachers indicate that the EDI functions well in the Irish context. Future research will consider  
23 Rasch modelling and examining issues of predictive validity.  
24  
25

### 26 27 **Policy Implications**

28 Epidemiological studies have clearly linked early socio-economic circumstances to later outcomes<sup>39-</sup>  
29 <sup>41</sup>. Yet, the specific factors and processes in the early years which contribute to these outcomes  
30 have not been adequately explored. The reliance on diagnostic instruments which are professionally  
31 administered and measure particular aspects of development has led to gaps in population level  
32 studies on early development outcomes<sup>21</sup>. The EDI is a unique, well-validated, population level  
33 instrument which allows us to track all five domains of early childhood development. It has the  
34 potential to enhance our understanding of the early years environment and identify populations of  
35 children at risk of developmental delay. This in turn can inform universal programmes to enhance  
36 outcomes for whole populations of children. National policy which focuses on the early years is  
37 essential with investment in peri-natal care, quality support to families and provision of pre-school  
38 care by highly skilled practitioners<sup>2</sup>. In Ireland, significant investment is being made in  
39 developing a high standard of accessible child care including a free pre-school year and a  
40 focus on quality curriculum development. This study was implemented in the year prior to the  
41 introduction throughout Ireland of the universally accessible free pre-school year and related  
42 investment in skills-enhancement for pre-school staff.  
43  
44  
45  
46  
47  
48  
49

50 From an Irish perspective, the study raises important questions regarding support to families where  
51 English is a second language. ESL was associated with lower mean scores across all domains. The  
52 pace of immigration to Ireland increased rapidly between 1990 and 2008 in response to employment  
53 opportunities which have since diminished. There is evidence of communities of immigrant  
54 populations living in areas of newly emerging disadvantage which lack the support structures  
55 associated with established communities. Indeed this study has identified such communities in  
56 which there were vulnerability rates of close to 50%. Particular attention also needs to be focused  
57  
58  
59  
60

1  
2  
3 on the implications of the findings in relation to age. Attendance at school is not mandatory until  
4 children are six years old but they may start once they are four, leading to classes with mixed age  
5 groups. Moreover, attendance by children under six is not officially monitored.  
6

7  
8 Poverty and inequality affect up to one quarter of Irish children. Throughout the boom years  
9 Irish policy in tackling child poverty consisted almost uniquely of direct payments to families, a  
10 practice which is now under threat. Moreover, little consideration was given to creating structures  
11 and policies to support and protect families. Tackling child poverty through a strategy of area-  
12 based prevention and early intervention features highly on the agenda of the current  
13 government<sup>43</sup>. This focus on both universal and targeted interventions has the potential to  
14 contribute to breaking this cycle of poverty. However, effective targeting in the context of  
15 early childhood development is problematic, with many instruments providing poor  
16 predictive reliability<sup>44</sup>. There is a need for longitudinal and population-level data which can  
17 be linked to administrative sources to provide a holistic basis for effective programming<sup>45</sup>. In  
18 Australia and Canada the EDI is providing just such data on early childhood development.  
19  
20  
21  
22

23 Early childhood development is a key public health issue that needs to be addressed  
24 through a comprehensive programme of targeted and universal approaches, supported by  
25 high quality research. The EDI can play a critical role in informing policy and practice at a  
26 local and national level, and allowing for internationally comparable studies on early  
27 childhood development.  
28  
29  
30  
31  
32  
33  
34  
35  
36  
37  
38  
39  
40  
41  
42  
43  
44  
45  
46  
47  
48  
49  
50  
51  
52  
53  
54  
55  
56  
57  
58  
59  
60



Table 1: Child development outcomes measured by the EDI

| EDI Domains /Sub-domains                     | Expected behaviour                                                                                                                                                                              |
|----------------------------------------------|-------------------------------------------------------------------------------------------------------------------------------------------------------------------------------------------------|
| <b>PHYSICAL HEALTH &amp; WELL BEING</b>      |                                                                                                                                                                                                 |
| <b>Physical readiness for school day</b>     | Usually dressed appropriately for school and not tired, late or hungry.                                                                                                                         |
| <b>Physical independence</b>                 | Can look after own personal needs appropriately, established hand preference, well coordinated, and do not suck a thumb/finger.                                                                 |
| <b>Gross and fine motor skills</b>           | Physically able to participate in school and excellent or good gross and fine motor skills.                                                                                                     |
| <b>SOCIAL COMPETENCE</b>                     |                                                                                                                                                                                                 |
| <b>Overall social competence</b>             | Very good ability to play and get along with various children, usually cooperative and self-confident.                                                                                          |
| <b>Responsibility and respect</b>            | Respect for others and for property, follow rules and take care of materials, accept responsibility for actions, and show self-control.                                                         |
| <b>Approaches to learning</b>                | Can work neatly, independently, and solve problems, follow instructions and class routines, easily adjust to changes.                                                                           |
| <b>Readiness to explore new things</b>       | Curious about the surrounding world, and eager to explore new books, toys and games.                                                                                                            |
| <b>EMOTIONAL MATURITY</b>                    |                                                                                                                                                                                                 |
| <b>Pro-social and helping behaviour</b>      | Helping someone hurt, sick or upset, offering to help spontaneously, invite bystanders to join in.                                                                                              |
| <b>Anxious and fearful behaviour</b>         | Seldom or never showing anxious behaviours; happy and able to enjoy school, comfortable being left at school by caregivers.                                                                     |
| <b>Aggressive behaviour</b>                  | Seldom or never showing aggressive behaviours; not using aggression to solve conflict, not having temper tantrums, and not mean to others.                                                      |
| <b>Hyperactivity and inattention</b>         | Not showing hyperactive behaviours; able to concentrate, attend to chosen activities, wait their turn, and usually think before doing.                                                          |
| <b>LANGUAGE &amp; COGNITIVE</b>              |                                                                                                                                                                                                 |
| <b>Basic literacy skills</b>                 | Have basic literacy skills: can handle a book, identify some letters and attach sounds to some letters, show awareness of rhyming words, know the writing directions, and write their own name. |
| <b>Interest literacy/numeracy and memory</b> | Showing interest in books and reading, math and numbers, and no difficulty remembering things.                                                                                                  |
| <b>Advanced literacy skills</b>              | Can read simple, complex words or sentences, write voluntarily, write simple words or sentences.                                                                                                |
| <b>Basic numeracy skills</b>                 | Can count to 20, recognize shapes and numbers, compare numbers, sort and classify, use one-to-one correspondence, and understand simple time concepts.                                          |
| <b>COMMUNICATION &amp; GENERAL KNOWLEDGE</b> |                                                                                                                                                                                                 |
| <b>Communication and general knowledge</b>   | Can communicate easily and effectively, can participate in story-telling or imaginative play, articulate clearly, show adequate general knowledge, and are proficient in their native language. |

Table 2: Comparison between sample for whom parental data was and was not available

|                                         | Parental<br>n= 865 | No Parental<br>n=378 | Sig   |
|-----------------------------------------|--------------------|----------------------|-------|
| Mean Age - years (SD)                   | 5.38 (.39)         | 5.36 (0.43)          | .405  |
| Female                                  | 46%                | 45%                  | .719  |
| English as a Second Language            | 10%                | 19%                  | <.001 |
| Identified Special needs                | 5%                 | 10%                  | <.001 |
| Member of the Traveller Community       | 2%                 | 6%                   | <.001 |
| <b>Mean EDI scores by domain (SD)</b>   |                    |                      |       |
| Physical health and wellbeing           | 8.8 (1.4)          | 8.1 (2.0)            | <.001 |
| Social competence                       | 8.3 (1.8)          | 7.5 (2.1)            | <.001 |
| Emotional maturity                      | 7.7 (1.6)          | 7.2 (1.7)            | <.001 |
| Language and cognitive development      | 8.8 (1.6)          | 8.0 (2.4)            | <.001 |
| Communication skills and gen knowledge  | 7.5 (2.8)          | 6.2 (3.2)            | <.001 |
| % Vulnerable in 1 or more domain of EDI | 23%                | 41%                  | <.001 |

**Table 3: Factors associated with developmental vulnerability (Univariate analysis)**

|                                                            | n(%)     | %<br>vulnerable* | OR  | CI           |
|------------------------------------------------------------|----------|------------------|-----|--------------|
| Male                                                       | 463 (54) | 30%              | 2.2 | (1.6 - 3.1)  |
| English as a second language (ESL)                         | 85 (10)  | 49%              | 3.8 | (2.4 - 6.1)  |
| Age <5 years                                               | 146 (17) | 31%              | 1.6 | (1.1 - 2.4)  |
| Low birth weight (<2500g)                                  | 49 (6)   | 41%              | 2.5 | (1.4 - 4.5)  |
| Mother primary education only (ref: University ed)         | 38 (4)   | 37%              | 2.8 | (1.3 - 5.8)  |
| Mother secondary education only (ref: University ed)       | 297 (34) | 27%              | 1.7 | (1.1 - 2.6)  |
| Four or more hours screen-time per day (ref: 1 hr or less) | 128 (15) | 32%              | 2.0 | (1.2 - 3.4)  |
| Never told stories in the past week (ref: every day)       | 10 (1)   | 50%              | 4.2 | (1.2 - 14.8) |
| Told stories once or twice in past week (ref: every day)   | 82 (9)   | 32%              | 1.9 | (1.2 - 3.3)  |
| No preschool                                               | 44 (5)   | 43%              | 2.7 | (1.4 - 5.0)  |

\*Refers to the % of children vulnerable in one or more of the five domains of the EDI

**Table 4: Logistic Regression predicting likelihood of vulnerability on EDI Scores**

|                                              | OR (95% CI)*     | OR (95% CI)**    |
|----------------------------------------------|------------------|------------------|
| Male                                         | 2.5 (1.8 - 3.6)  | 2.7 (1.8 - 3.9)  |
| ESL                                          | 4.3 (2.6 - 6.9)  | 4.5 (2.6 - 7.8)  |
| Age <5 years                                 | 1.4 (0.9 - 2.2)  | 1.3 (0.8 - 2.0)  |
| Low Birth Weight                             | 2.6 (1.4 - 4.9)  | 2.6 (1.3 - 5.0)  |
| Mother Education (ref: University education) |                  |                  |
| Primary or less                              | 3.1 (1.4 - 6.7)  | 2.5 (1.0 - 6.0)  |
| Secondary                                    | 2.1 (1.3 - 3.3)  | 2.1 (1.3 - 3.4)  |
| Diploma                                      | 1.5 (0.9 - 2.3)  | 1.5 (0.9 - 2.4)  |
| Daily Screen time (ref: 1 hour or less)      |                  |                  |
| 2 to 3 hours                                 | 1.2 (0.8 - 1.8)  | 1.0 (0.6 - 1.6)  |
| 4 or more hours                              | 1.7 (1.0 - 3.0)  | 1.2 (0.6 - 2.1)  |
| Stories in the past week (ref: every day)    |                  |                  |
| Never                                        | 3.9 (1.0 - 14.3) | 5.3 (1.3 - 21.1) |
| Once or twice                                | 1.7 (1.0 - 2.9)  | 1.4 (0.8 - 2.5)  |
| Many times                                   | 1.2 (0.8 - 1.7)  | 1.1 (0.7 - 1.6)  |
| No Pre-school                                | 1.9 (1.0 - 3.8)  | 1.5 (0.7 - 3.1)  |

\* Adjusted for Age, gender and ESL (separate tests run for each subsequent variable)

\*\* Adjusted for all other variables in one model

**Table 5: PAF for vulnerability based on OR adjusted for all other variables**

|                                   | N (%)    | OR (95% CI)**    | PAF (95% CI)        |
|-----------------------------------|----------|------------------|---------------------|
| Under five                        | 146 (17) | 1.3 (0.8 - 2.0)  | 3.0 (-2.8 - 8.5)    |
| Male                              | 463 (54) | 2.7 (1.8 - 3.9)  | 34.6 (21.3 - 45.7)  |
| ESL                               | 85 (10)  | 4.5 (2.6 - 7.8)  | 12.2 (7.3 - 16.8)   |
| Low Birth Weight                  | 49 (6)   | 2.6 (1.3 - 5.0)  | 4.5 (1.0 - 8.0)     |
| Mother Education: Primary or less | 38 (4)   | 2.5 (1.0 - 6.0)  | 2.8 (-0.2 - 5.7)    |
| Secondary                         | 297 (34) | 2.1 (1.3 - 3.4)  | 16.8 (5.9 - 26.5)   |
| Diploma                           | 263 (30) | 1.5 (0.9 - 2.4)  | 7.7 (-1.8 - 16.3)   |
| Daily Screen time: 2 to 3 hours   | 532 (61) | 1.0 (0.6 - 1.6)  | -0.3 (-21.7 - 17.3) |
| 4 or more hours                   | 128 (15) | 1.2 (0.6 - 2.1)  | 1.6 (-5.2 - 7.9)    |
| Stories in the past week: Never   | 10 (1)   | 5.3 (1.3 - 21.1) | 1.7 (0.1 - 3.3)     |
| Once or twice                     | 82 (9)   | 1.4 (0.8 - 2.5)  | 2.6 (-2.1 - 7.0)    |
| Many times                        | 251 (29) | 1.1 (0.7 - 1.6)  | 1.7 (-6.8 - 9.5)    |
| No Pre-school                     | 44 (5)   | 1.5 (0.7 - 3.1)  | 1.8 (-1.6 - 5.1)    |

\*\* Adjusted for all other variables

**Funding:** This work was supported by the Health Research Board in Ireland under grant number PHD/2007/16

No competing interests exist

**Ethical approval** for this study was obtained from the Clinical Research Ethics Committee of the Cork Teaching Hospitals, Cork, Ireland.

## REFERENCES

1. Kershaw P, Forer B. Selection of area-level variables from administrative data: an intersectional approach to the study of place and child development. *Health Place* 2010;16(3):500-11.
2. Marmot M, Allen J, Goldblatt P, et al. 'Fair Society Health Lives', The Marmot Review. In: England SRoHli, editor. London, 2010.
3. Power C, Elliott J. Cohort profile: 1958 British birth cohort (National Child Development Study). *International Journal of Epidemiology* 2006;35(1):34-41.
4. Lemelin J-P, Boivin M, Forget-Dubois N, et al. The Genetic–Environmental Etiology of Cognitive School Readiness and Later Academic Achievement in Early Childhood. *Child Development* 2007;78(6):1855-69.
5. Nicholson JM, Lucas N, Berthelsen D, et al. Socioeconomic inequality profiles in physical and developmental health from 0-7 years: Australian National Study. *Journal of Epidemiology & Community Health* 2012;66(1):81-87.
6. Leventhal T, Brooks-Gunn J. The Neighborhoods They Live in: The Effects of Neighborhood Residence on Child and Adolescent Outcomes. *Psychological Review* 2000;126(2):309 - 37.
7. Heckman JJ, Masterov DV. The Productivity Argument for Investing in Young Children. *Applied Economic Perspectives and Policy* 2007;29(3):446-93.
8. Kershaw P, Warburton B, Anderson L, et al. The economic costs of early vulnerability in Canada. *Can J Public Health* 2010;101 Suppl 3:S8-12.
9. Maggi S, Roberts W, MacLennan D, et al. Community resilience, quality childcare, and preschoolers' mental health: A three-city comparison. *Social Science & Medicine*;In Press, Accepted Manuscript.
10. Furumoto-Dawson A, Gehlert S, Sohmer D, et al. Early-life conditions and mechanisms of population health vulnerabilities. *Health Aff (Millwood)* 2007;26(5):1238-48.
11. Guhn M, Janus M, Hertzman C. The Early Development Instrument: Translating school readiness assessment into community actions and policy planning. *Early Education and Development* 2007;18(3):369-74.
12. Rose G. Sick Individuals and Sick Populations. *International Journal of Epidemiology* 1985;14:32 - 38.
13. Guhn M, Gadermann A, Zumbo BD. Does the EDI measure school readiness in the same way across different groups of children? *Early Education and Development* 2007;18(3):453-72.
14. Avan BI, Kirkwood B. Review of the theoretical frameworks for the study of child development within public health and epidemiology. *Journal of Epidemiology and Community Health* 2010;64:388 - 93.
15. Janus M, Brinkman S, Duku E. Validity and Psychometric Properties of the Early Development Instrument in Canada, Australia, United States, and Jamaica. *Social Indicators Research* 2011;103(2):283-97.

16. Brinkman S, Gialamas A, Rahman A, et al. Jurisdictional, socioeconomic and gender inequalities in child health and development: analysis of a national census of 5-year-olds in Australia. *BMJ Open* 2012;2(5).
17. C.S.O. Profile 7: Religion, Ethnicity and Irish Travellers. Cork: Central Statistics Office, 2012.
18. Haase T, Pratschke J. Deprivation and its Spatial Articulation in the Republic of Ireland. Dublin: Area Development Management, 2005.
19. OMCYA. State of the Nations Children. Dublin: Office of the Minister for Children and Youth Affairs, 2010.
20. Janus M, Brinkman S, Duku E, et al. The Early Development Instrument: A Population-based Measure for Communities. Hamilton, Ontario: Offord Centre for Child Studies, McMaster University, 2007.
21. Janus M, Offord DR. Development and Psychometric Properties of the Early Development Instrument (EDI): A Measure of Children's School Readiness. *Canadian Journal of Behavioural Science-Revue Canadienne Des Sciences Du Comportement* 2007;39(1):1-22.
22. D'Angiulli A, Warburton W, Dahinten S, et al. Population-level associations between preschool vulnerability and grade-four basic skills. *PLoS One* 2009;4(11):e7692.
23. Brinkman S, Silburn S, Lawrence D, et al. Investigating the validity of the Australian Early Development Index. *Early Education and Development* 2007;18(3):427-51.
24. Muhajarine N, Puchala C, Janus M. Does the EDI Equivalently Measure Facets of School Readiness for Aboriginal and Non-Aboriginal children? *Social Indicators Research* 2011;103(2):299-314.
25. Williams J, Greene S, Doyle E, et al. Growing up in Ireland national longitudinal study of children. The lives of 9 year olds: The Stationery Office, 2009.
26. Morgan K, McGee H, Watson D, et al. SLAN 2007: Survey of Lifestyle, Attitudes & Nutrition in Ireland: Main Report. Dublin: Department of Health and Children, 2008.
27. Brinkman S, Sayers M, Goldfeld S, et al. Population monitoring of language and cognitive development in Australia: the Australian Early Development Index. *International Journal of Speech-Language Pathology* 2009;11(5):419-30.
28. Carey DJ. *The Essential Guide to Special Education in Ireland*. Dublin: Primary ABC, 2005.
29. O'Sullivan JJ, Pearce MS, Parker L. Parental recall of birth weight: how accurate is it? *Archives of Disease in Childhood* 2000;82(3):202-03.
30. Hanley JA. A heuristic approach to the formulas for population attributable fraction. *Journal of Epidemiology and Community Health* 2001;55(7):508-14.
31. Miettinen OS. Proportion of disease caused or prevented by a given exposure, trait or intervention. *American Journal of Epidemiology* 1974(99):325 - 32.
32. Greenland S, Drescher K. Maximum likelihood estimation of the attributable fraction from logistic models. *Biometrics* 1993;49:865-72.
33. Carpiano RM, Lloyd JEV, Hertzman C. Concentrated affluence, concentrated disadvantage, and children's readiness for school: A population-based, multi-level investigation. *Social Science & Medicine* 2009;69(3):420-32.
34. Janus M, Duku E. The School Entry Gap: Socioeconomic, Family, and Health Factors Associated With Children's School Readiness to Learn. *Early Education and Development* 2007;18(3):375-403.
35. Kohen D, Oliver L, Pierre F. Examining the effects of schools and neighbourhoods on the outcomes of Kindergarten children in Canada. *International Journal of Speech-Language Pathology* 2009;11(5):404-18.
36. Bus AG, Van Ijzendoorn MH. Mothers Reading to Their 3-Year-Olds: The Role of Mother-Child Attachment Security in Becoming Literate. *Reading Research Quarterly* 1995;30(4):998-1015.
37. Fletcher KL, Reese E. Picture book reading with young children: A conceptual framework. *Developmental Review* 2005;25(1):64-103.

- 1  
2  
3 38. Janus M. Transition to school. In: Laverick DM, Jalongo MR, editors. *Transitions to early care and*  
4 *education*: Springer Netherlands, 2011:177 - 87.  
5 39. Abdalla S, Cronin F, Daly L, et al. Our Geels: All Ireland Traveller Health Study. Dublin,  
6 2010:University College Dublin.  
7 40. Maggi S, Irwin LJ, Siddiqi A, et al. The social determinants of early child development: an  
8 overview. *J Paediatr Child Health* 2010;46(11):627-35.  
9 41. Hertzman C. The state of child development in Canada: Are we moving toward, or away from,  
10 equity from the start? *Paediatr Child Health* 2009;14(10):673-6.  
11 42. Banks J, McCoy S. A Study on the Prevalence of Special Educational Needs. Dublin: Economic and  
12 Social Research Institute, 2011.  
13 43. Programme for Government 2011 - 2016. In: Expenditure DoP, editor. Dublin, 2011.  
14 44. Lynch JW, Law C, Brinkman S, et al. Inequalities in child healthy development: Some challenges  
15 for effective implementation. *Social Science & Medicine* 2010;71(7):1244-48.  
16 45. Hertzman C, Williams R. Making early childhood count. *Canadian Medical Association Journal*  
17 2009;180(1):68-71.  
18  
19  
20  
21  
22  
23  
24  
25  
26  
27  
28  
29  
30  
31  
32  
33  
34  
35  
36  
37  
38  
39  
40  
41  
42  
43  
44  
45  
46  
47  
48  
49  
50  
51  
52  
53  
54  
55  
56  
57  
58  
59  
60

## Determinants of Vulnerability in Early Childhood Development in Ireland – a Population Level Study

<sup>1</sup>Margaret Curtin

<sup>1</sup>Jamie Madden

<sup>2</sup>Anthony Staines

<sup>1</sup>Ivan J. Perry

<sup>1</sup>Department of Epidemiology and Public Health, University College Cork, Ireland

<sup>2</sup>School of Nursing and Human Sciences, Dublin City University, Ireland

Corresponding author: Margaret Curtin

Department of Epidemiology and Public Health,  
Floor 4, Western Gateway Building,  
University College Cork,  
Cork, Ireland.

Telephone: +353 86 3219121

Fax: +353 21 4205469

e-mail: [m.curtin@ucc.ie](mailto:m.curtin@ucc.ie)

**Key words:** Child development; pre-school child; population health; epidemiological measurement

**Word Count:** 399~~18~~



## ARTICLE SUMMARY

### Article focus

- This study demonstrates that significant population level variation exists in healthy child development in Ireland.
- The Early Development Instrument (EDI) is a unique, well-validated population level instrument which allows us to track all five domains of early development and identify populations of children at risk.
- When used in conjunction with a parental questionnaire factors which impact on child development at the child and family level can be identified.

### Key Messages

- A direct population level evidence base on normal child development is needed both as an indicator of child health and a predictor of future outcomes.
- Three child-level demographic factors (age, gender and language) accounted for over half of the population level risk of developmental vulnerability, reinforcing the need for universal early childhood programmes which are cognisant of these variations.

### Strengths and limitations of the study

- This is the first peer-reviewed population level study published in Europe assessing child development outcomes across multiple domains using the EDI.
- The study identifies proximal factors associated with child development, yet children and families do not live in a vacuum. Further research is needed to identify associated factors in the broader socio-cultural environment.

## BACKGROUND

There is significant epidemiological evidence that early childhood development (from gestation to age six) strongly influences life-long health trajectories<sup>1</sup>. Indeed, major public health problems such as obesity, heart-disease and mental health problems can be seen to have roots in early childhood<sup>2-3</sup>. This results from a complex interplay between genetic makeup, in utero development, and both pre and postnatal environmental factors, all of which influence brain development in the first five years of life<sup>4</sup>.

There is also evidence of a social gradient in child development<sup>5</sup>, with children from poorer backgrounds doing less well in school and entering into an intergenerational cycle of reduced employment opportunities, higher fertility and health inequalities<sup>6</sup>. The long term social and economic gain of investing in the early years is also recognised<sup>7</sup>. Kershaw estimates that the cost of preventable early childhood vulnerability to the Canadian economy is between \$2.2 and \$3.4 trillion<sup>8</sup>.

The challenge for public health, is to give due consideration to early childhood development both as an indicator of child health and as a predictor of future outcomes. Child development has been recognised as a key social determinant<sup>9-10</sup>. Moreover, the relatively large numbers of children with less pronounced development delay are a potentially greater burden than a small number of children at high risk<sup>11</sup> leading to a need for a population health approach<sup>12</sup>. Yet, measurement of child development is usually in the form of a diagnostic which aims to identify children at greatest risk and provide appropriate individual care, leaving a dearth of research evidence on which to build population level strategies<sup>13-14</sup>. In this context a direct population level evidence base on normal child development is needed.

The Early Development Instrument (EDI) is an internationally accepted, validated tool which has the potential to provide such an evidence base<sup>15</sup>. In Australia the EDI (AEDI) has been used universally as a census of child development and has revealed significant variation across states and territories<sup>16</sup>. [While the EDI has been implemented at a population level in Scotland, Sweden and Kosovo](#). This is the first [peer reviewed](#) population-level study [published](#) in Europe assessing child development outcomes across multiple domains, and using the EDI and linked parental questionnaire. The overall objective of the study was to ascertain the proportion of children who were developmentally ready for school in a representative sample of schools in a major urban centre in Ireland using the EDI and to examine associated factors. The study also aimed to assess the feasibility of implementing the EDI and its performance in this setting.

Ireland is a largely homogenous country with 85.8% of the population ethnically White Irish and a further 9.3% of other white ethnic background, primarily British<sup>17</sup>. Cork is one of five major urban centres. While all of these centres are comprised of areas of concentrated affluence and disadvantage, there are similar overall rates of key socio-economic indicators including unemployment, lone-parent families and education<sup>18</sup>. There is a total population of 64,937 five year olds. A minority (1.1%) of Irish children are members of the Traveller Community. Moreover, 19.5% are considered at risk of poverty and 8% live in consistent poverty<sup>19</sup>. The education system is static throughout the country.

## METHODS

1  
2  
3 This observational study of child development was implemented with children in their first year of  
4 formal education (in Ireland this is referred to as 'Junior Infants') in 42 of the 47 primary schools in  
5 Cork city. Five schools in the city declined to take part. These declining schools were representative  
6 of a cross-section of schools in Cork - one boys school, one girls school, one large mixed, middle  
7 income school, one designated disadvantaged school and one Irish speaking school – and their  
8 omission would not have affected the representativeness of the demographic composition of the  
9 study. A further four schools agreed to participate in the study but chose not to administer the  
10 parental questionnaire as they believed it would put undue pressure on parents with literacy  
11 challenges. These were all designated disadvantaged schools and this has contributed to the under-  
12 representation of the most vulnerable children in the parental study.  
13  
14

15  
16 All eligible children in the participating schools were invited to be included in the study.. Eligibility  
17 criteria were: being in the latter half of the first year of formal education (i.e. having completed A  
18 minimum of 4 to 5 months of education), being known by the teacher for more than one month and  
19 not having left the school.  
20  
21

### 22 **Measurement of Child Development - The Early Development Instrument**

23  
24 Child development at school entry age was measured using the Early Development Instrument (EDI).  
25 This population level measure was designed at the Offord Centre for Child Studies, McMaster  
26 University, Hamilton, Ontario in the late 90s to measure the extent to which children have attained  
27 the physical, social, emotional and cognitive maturity necessary to engage in school activities <sup>20</sup>.  
28 The EDI is a community or population level measure, not an individual screening or diagnostic tool.  
29 The underlying focus is that of a population health approach i.e. small modifications of risk for large  
30 numbers are more effective at producing change than large modifications for small numbers <sup>12</sup>. It  
31 can be retrospective, focusing on early childhood development outcomes; or predictive, informing  
32 school and child-health programmes <sup>20</sup>. The instrument consists of five domains, sixteen sub-  
33 domains and 104 questions. The domains and sub domains are outlined in Table 1.  
34  
35  
36

37 The EDI is a well validated instrument which has had extensive psychometric testing done both in  
38 Canada and Australia <sup>15 20-23</sup>. It has also been proven valid for use in minority populations <sup>24</sup>. In this  
39 Irish study, the EDI had good internally consistency by domains with Cronbach alphas of between 0.8  
40 and 0.96.  
41  
42

### 43 **Parental Questionnaire**

44  
45 In 2003 a parental questionnaire was developed and tested by the Offord Centre to complement the  
46 results of the EDI and provide a deeper population level context to the lives of children <sup>20</sup>. This  
47 questionnaire was adapted to suit the Irish context incorporating validated questions from the  
48 Growing Up in Ireland Study <sup>25</sup> and the SLAN Survey of Lifestyles, Behaviour and Nutrition in Ireland  
49 <sup>26</sup>. It consists of seven sections: child health and development; child care; pre-school; school; family;  
50 neighbourhood; and background information.  
51  
52

### 53 **Data collection**

54  
55 The EDI is a teacher completed questionnaire based on five months observation of the children from  
56 the date when they start school, and was, therefore, implemented in the latter half of the first year  
57 of formal education. Prior to completing the questionnaires, the teachers were given a short  
58  
59  
60

1  
2  
3 training and were each issued with an EDI guide book. Children were not present when the  
4 questionnaire was completed and no individual identifiers were recorded. Each child was assigned  
5 a form ID which was used on both the EDI and Parental Questionnaire.  
6

7  
8 Passive consent was used in line with previous EDI studies in Canada. An information letter was  
9 distributed to all parents by the class teacher two weeks before commencing the study. Parents  
10 were given detailed information on the study and asked to contact the school if they did not want  
11 their child included. A total of seven parents opted not to participate. Ethical approval was granted  
12 by the Clinical Research Ethics Committee of the Cork Teaching Hospitals.  
13

14  
15 The parental questionnaires were distributed in school bags or homework folders. Each parental  
16 pack contained a letter of explanation, questionnaire (again with no individual identifier) and a blank  
17 envelope in which to return the questionnaire sealed to the school. Parents were reassured that  
18 the envelope would not be opened at the school.  
19

### 20 **Developmental scoring**

21  
22 EDI scores were calculated for each developmental domain i.e. Physical Health and Well-being;  
23 Social Competence; Emotional Maturity; Language and Cognitive Development; and Communication  
24 Skills and General Knowledge. All questions had a 2 or 3 point Likert type response format (yes, no,  
25 don't know; very true, sometimes or somewhat true, never or not true, don't know). All responses  
26 had a score of 0 to 10 (2 point answers were scored 0 and 10; 3 point answers were scored 0, 5  
27 and 10). 'Don't know' responses were not scored. Domain scores refer to the child's mean score in  
28 that domain - ranging between 0 and 10. Higher scores indicate better results.  
29  
30

31  
32 Children who scored in the lowest 10% of the study population in one or more of the five domains of  
33 the EDI were classed as 'vulnerable'. The 10% cut off is recommended because it is higher than  
34 typical clinical cut-off's and should therefore include children who may be more difficult to diagnose  
35 <sup>27</sup>. Those scoring in the lowest 10-25% for one or more domains were deemed 'at risk' and children  
36 who scored in the top 75% were 'on track' in that domain. Each domain was scored separately as  
37 children who are vulnerable in one area cannot compensate through competence in another. All  
38 scores were aggregated to the group level. In the absence of an Irish normative sample, to ensure  
39 the validity of the cut-off points, data was also scored against Canadian normative data. There was a  
40 99% correlation between 'vulnerability' using the Irish and Canadian cut-off points. In four of the  
41 five domains there was 100% correlation between vulnerability using the Irish and Canadian cut-off  
42 points.  
43  
44  
45

46  
47 Data from the parental questionnaires was linked to the teacher filled questionnaire using the Form  
48 ID number and the matching was crosschecked using the recorded date of birth and gender.  
49 Questions, again, were constructed in a Likert type response format - yes, no or three to five  
50 response options. Demographic questions on child's date of birth and birth weight were also  
51 included.  
52

### 53 **Explanatory variables**

54  
55 The child's age was calculated from their date of birth and the date on which the form was  
56 completed and reported in years and months. 'Children for whom English is a second language  
57 (ESL)' refers to those reported by the teacher to have a first language other than English. Members  
58  
59  
60

1  
2  
3 of the Travelling Community were children who were known by school to be part of this Irish ethnic  
4 minority group.

5  
6 'Children identified as special needs' refers to those children who had already been identified as  
7 needing special assistance in the classroom. In Ireland this is defined as having a 'Special Education  
8 Condition' which has been recognised through a standardised assessment process<sup>28</sup>.

9  
10 Parental reported birth weight was used to calculate whether the child had a low birth weight i.e.  
11 less than 2.5kgs. Parental report of birth weight has been proven to be adequately accurate to be  
12 acceptable for research purposes<sup>29</sup>.

13  
14 Parents were asked how much time (to the nearest hour) the child spent either watching television,  
15 using the computer or playing video games on a typical school day. This was coded into '1 or less',  
16 'two to three' and '4 or more' hours.

### 17 18 19 **Data analysis**

20  
21 SPSS was used to analyse data. Each child's EDI scores were calculated by the Offord Centre for  
22 Child Studies in line with international EDI process. Initial analysis involved a cross-tabulation of  
23 potential risk items from the teacher completed EDI questionnaire (i.e. gender, age, ESL, pre-school  
24 attendance and membership of the Travelling Community) against the child's score in each of the  
25 developmental domains.  
26  
27

28  
29 All further analyses reported here were confined to the sub-group of children for whom parental  
30 data was available. Univariate analysis was used to explore factors associated with 'vulnerability' i.e.  
31 being in the lowest 10% of the target population in one or more domain. Factors which proved  
32 significant ( $p < 0.05$ ) were then entered into logistic regression models to predict likelihood of  
33 vulnerability on EDI scores. The first model adjusted for age, gender and ESL. The second model  
34 adjusted for all other factors.  
35  
36

37  
38 Population attributable fractions (PAF) were used to calculate the proportion of risk attributed to  
39 each of the factors in the final regression<sup>30-31</sup>. This was calculated using the 'punaf' command in  
40 STATA 12 which calculates confidence intervals for PAF, and also for scenario means and their ratio,  
41 known as the population unattributable fraction. Punaf uses the method for estimating PAFs  
42 recommended by Greenland and Drescher (1993) for cohort and cross-sectional studies<sup>32</sup>.  
43  
44  
45

### 46 47 **RESULTS**

48  
49 EDI questionnaires were distributed to teachers of 1366 children. A total of 1243 (92%) were  
50 returned completed and valid. Of these, 45% (n=563) were girls. The average age at which children  
51 in the study started school was 4 years and 9 months. The youngest was 3 years 11 months and the  
52 oldest 6 years and 1 month.  
53

54  
55 There was considerable diversity in first language with 12.7% of the children reported to have  
56 English as a Second Language (ESL) and 36 different languages spoken. Three percent of the children  
57 in the study were members of the Traveller Community. The majority of children (76%) were known  
58 by the teacher to have attended preschool in the year before commencing full-time education.  
59  
60

1  
2  
3 In total, 6.6% of children had already been identified as having special needs. The study was  
4 conducted in mainstream primary schools and this number does not, therefore, include those  
5 children in Cork attending Junior Infants equivalent in special schools, who would tend to be more  
6 severely disabled.  
7

8  
9 Parental questionnaires were returned and linked to 865 (63%) valid child questionnaires. The  
10 characteristics of the study population varied somewhat between the overall study and  
11 those who returned the parental questionnaire. In particular, the proportion of children for  
12 whom English was a second language fell from 12.7% in the overall group to 9.8% in those  
13 returning parental questionnaires; for children reported as having special needs, the  
14 proportions were 6.615 and 5.0 % respectively; and for those reported to be members of  
15 the Travelling community, 3.1% and 1.7% respectively. The characteristics of the population  
16 who returned the parental questionnaire and those who did not are compared in Table 2.  
17  
18  
19

### 20 **Distribution of domain scores (Mean and standard error)**

21  
22 Mean scores varied across the EDI domains. However, particular groups of children consistently  
23 scored below the mean in all domains i.e. boys, children who had English as a second language,  
24 members of the Traveller Community, children who had not been to pre-school and those who were  
25 under four years 10 months at the time of the study. This is outlined in Figure 21 with the vertical  
26 axis representing the mean domain score for the study population.  
27  
28

### 29 **Factors associated with vulnerability**

30  
31 Over one quarter (28.6%) of children in the study were developmentally vulnerable (i.e. in the  
32 lowest 10<sup>th</sup> percentile for one or more domains). In total 12% were vulnerable in only one domain,  
33 6% in 2 domains, 5% in 3 domains, 3% in 4 domains and 3% were vulnerable in all 5 domains.  
34  
35

36 The following analysis is based only the subset of the study population (n=865) on whom parental  
37 questionnaires were returned.  
38

39 Factors associated with developmental vulnerability (outlined in Table 3) were being male (odds  
40 ratio [OR] =2.2, 95% confidence interval [CI] = 1.6 – 3.1), ESL (OR = 3.8, CI= 2.4 – 6.1), being under  
41 five years of age at the time of the study (OR = 1.6, CI = 1.1 – 2.4) and low birth weight (OR=2.5,  
42 CI=1.4 – 4.5). When compared with children whose mothers had a university education those with  
43 only primary education (OR= 2.8, CI = 1.3 - 5.8) or secondary level (OR = 1.7, CI = 1.1 - 2.6) showed  
44 higher levels of vulnerability. Children who were never or seldom told stories in the past week and  
45 those who spent more than four hours watching television or playing video games also showed  
46 significantly increased vulnerability.  
47  
48

### 49 **Logistic Regression**

50  
51 Regression analysis was then used to assess the impact of each variable on the odds of being  
52 vulnerable as outlined in Table 4. The first model controlled for being male, having English as a  
53 second language and being under five years of age at the time of EDI completion, the second also  
54 controlled for all other factors. Children whose birth weight was less than 2.5kg were over twice as  
55 likely to be vulnerable. Mother's education showed a graded effect. When controlled for all other  
56  
57  
58  
59  
60

1  
2  
3 variables, children who had not been told or read stories in the past week were over five times as  
4 likely to be vulnerable than those who were told stories every day. In the final model, the amount of  
5 time spent watching television became insignificant.  
6

### 7 **Population Attributable Fraction (PAF)**

8  
9 PAF was used to measure the proportion of vulnerability attributed to each of the factors included in  
10 the final regression model (Table 5). Boys were almost three times as likely as girls to be vulnerable  
11 and being male accounted for 35% of the overall vulnerability. English as a second language  
12 accounted for 12%, and mothers education (primary, secondary or diploma) for 27% of vulnerability.  
13 Despite the high risk of vulnerability among children who were not read to (OR 5.3), this only  
14 accounted for 1.7% of the overall vulnerability reflecting its low prevalence in this population.  
15  
16  
17

### 18 **DISCUSSION**

19 This paper explored the extent to which children in a major urban centre in Ireland have attained the  
20 level of child development necessary to engage fully in the education process. The findings suggest  
21 that, as expected, a significant minority of over one quarter (28.6%) of children in the study were not  
22 developmentally ready to engage in, and thereby benefit fully from school. Clearly these findings  
23 should be interpreted cautiously in light of the current level of development of the EDI in Ireland, in  
24 particular, the lack of data on predictive validity for the EDI in the Irish population. At the same  
25 time, the fundamental issue is not the absolute scores but the unacceptable variation in scores  
26 related to socio-economic, environmental and ecological circumstances.  
27  
28  
29  
30

31 The overall level of developmental vulnerability was consistent with findings from urban areas in  
32 Canada where the EDI has been implemented <sup>1 33-35</sup> ~~(Carpiano et al., 2009, Kershaw et al., 2010,~~  
33 ~~Janus and Duku, 2007, Kohen et al., 2009)~~. Indeed mean scores across all domains in the Irish  
34 sample were similar to those in the Canadian normative sample. Factors associated with increased  
35 risk of vulnerability at the child level were being male, a younger child, having English as a second  
36 language and low birth weight. Key factors at the family level were mothers education and reading  
37 stories. In the final model, the strongest predictor of vulnerability on EDI scores was story telling.  
38 Children who were never told stories in the past week were over five times as likely to be vulnerable  
39 compared with children who were told stories every day. This supports numerous studies which  
40 show a link between reading stories and literacy development <sup>36</sup> and with broader aspects of  
41 development <sup>37</sup> These are again consistent with findings from Canada, further supporting the  
42 transferability of the instrument between the two jurisdictions <sup>38</sup>  
43  
44  
45  
46

47 The mean scores across all five domains varied between sub-groups of the population. The impact  
48 of age is very clear. Younger children, aged less than 4 years and 10 months scored on average less  
49 well across all the domains. Children who had not attended pre-school also showed below average  
50 scores. However, non- attendance at pre-school can result from a variety of underlying reasons.  
51 Therefore, these scores cannot be attributed solely to the lack of pre-school education. Children  
52 from the Traveller Community also showed lower mean scores across all domains. Traveller children  
53 face a variety of challenges including accommodation in poorly serviced communal sites, greater risk  
54 of low birth weight, ill-health and hospitalisation <sup>39</sup>.  
55  
56  
57  
58  
59  
60

1  
2  
3 Three child-level demographics were strongly associated with vulnerability. Boys, children who start  
4 school at a younger age and those for whom English is a second language were more likely to be  
5 vulnerable. PAF illustrates that these three factors account for half of all vulnerability. These  
6 findings are consistent with international studies<sup>34 40</sup>  
7

8  
9 Hertzman describes vulnerability levels of above 15% as an unacceptable level of difficulty at school  
10 entry age<sup>41</sup>. There is considerable debate regarding the expected level of biologically determined  
11 disability developmental vulnerability. OECD country estimates range between 1.8% and 10.4%<sup>42</sup>.  
12 Considering these expected levels of biological determined developmental delay external factors can  
13 be seen to contribute to major disparities.  
14

### 15 **Limitations**

16  
17 The overall study was representative of children in their first year in formal education in Cork city.  
18 However, there was a 63% return rate on the parental questionnaire. While this compares  
19 favourably to other jurisdictions where this method has been used<sup>38</sup>, there are significant  
20 differences between those for whom parental data were available and those for whom it was not.  
21 It is clear that the most vulnerable children were underrepresented in the parental sample.  
22  
23

24  
25 This was the first study using the EDI in Ireland. Therefore, there was limited scope for validity  
26 testing. Comparisons with Canadian normative data, internal validity testing and qualitative work  
27 with teachers indicate that the EDI functions well in the Irish context. Future research will consider  
28 Rasch modelling and examining issues of predictive validity.  
29

### 30 **Policy Implications**

31  
32 Epidemiological studies have clearly linked early socio-economic circumstances to later outcomes<sup>39-</sup>  
33 <sup>41</sup>. Yet, the specific factors and processes in the early years which contribute to these outcomes  
34 have not been adequately explored. The reliance on diagnostic instruments which are professionally  
35 administered and measure particular aspects of development has led to gaps in population level  
36 studies on early development outcomes<sup>21</sup>. The EDI is a unique, well-validated, population level  
37 instrument which allows us to track all five domains of early childhood development. It has the  
38 potential to enhance our understanding of the early years environment and identify populations of  
39 children at risk of developmental delay. This in turn can inform universal programmes to enhance  
40 outcomes for whole populations of children. National policy which focuses on the early years is  
41 essential with investment in peri-natal care, quality support to families and provision of pre-school  
42 care by highly skilled practitioners<sup>2</sup>. In Ireland, significant investment is being made in  
43 developing a high standard of accessible child care including a free pre-school year and a  
44 focus on quality curriculum development. This study was implemented in the year prior to the  
45 introduction throughout Ireland of the universally accessible free pre-school year and related  
46 investment in skills-enhancement for pre-school staff.  
47  
48  
49  
50  
51

52  
53 From an Irish perspective, the study raises important questions regarding support to families where  
54 English is a second language. ESL was associated with lower mean scores across all domains. The  
55 pace of immigration to Ireland increased rapidly between 1990 and 2008 in response to employment  
56 opportunities which have since diminished. There is evidence of communities of immigrant  
57 populations living in areas of newly emerging disadvantage which lack the support structures  
58  
59  
60



1  
2  
3 associated with established communities. Indeed this study has identified such communities in  
4 which there were vulnerability rates of close to 50%. Particular attention also needs to be focused  
5 on the implications of the findings in relation to age. Attendance at school is not mandatory until  
6 children are six years old but they may start once they are four, leading to classes with mixed age  
7 groups. Moreover, attendance by children under six is not officially monitored.  
8  
9

10 Poverty and inequality affect up to one quarter of Irish children. Throughout the boom years  
11 Irish policy in tackling child poverty consisted almost uniquely of direct payments to families, a  
12 practice which is now under threat. Moreover, little consideration was given to creating structures  
13 and policies to support and protect families. Tackling child poverty through a strategy of area-  
14 based prevention and early intervention features highly on the agenda of the current  
15 government<sup>43</sup>. This focus on both universal and targeted interventions has the potential to  
16 contribute to breaking this cycle of poverty. However, effective targeting in the context of  
17 early childhood development is problematic, with many instruments providing poor  
18 predictive reliability<sup>44</sup>. There is a need for longitudinal and population-level data which can  
19 be linked to administrative sources to provide a holistic basis for effective programming<sup>45</sup> In  
20 Australia and Canada the EDI is providing just such data on early childhood development.  
21  
22  
23  
24

25 Early childhood development is a key public health issue that needs to be addressed  
26 through a comprehensive programme of targeted and universal approaches, supported by  
27 high quality research. The EDI can play a critical role in informing policy and practice at a  
28 local and national level, and allowing for internationally comparable studies on early  
29 childhood development.  
30  
31  
32  
33  
34  
35  
36  
37  
38  
39  
40  
41  
42  
43  
44  
45  
46  
47  
48  
49  
50  
51  
52  
53  
54  
55  
56  
57  
58  
59  
60

Table 1: Child development outcomes measured by the EDI

| EDI Domains /Sub-domains                     | Expected behaviour                                                                                                                                                                              |
|----------------------------------------------|-------------------------------------------------------------------------------------------------------------------------------------------------------------------------------------------------|
| <b>PHYSICAL HEALTH &amp; WELL BEING</b>      |                                                                                                                                                                                                 |
| <b>Physical readiness for school day</b>     | Usually dressed appropriately for school and not tired, late or hungry.                                                                                                                         |
| <b>Physical independence</b>                 | Can look after own personal needs appropriately, established hand preference, well coordinated, and do not suck a thumb/finger.                                                                 |
| <b>Gross and fine motor skills</b>           | Physically able to participate in school and excellent or good gross and fine motor skills.                                                                                                     |
| <b>SOCIAL COMPETENCE</b>                     |                                                                                                                                                                                                 |
| <b>Overall social competence</b>             | Very good ability to play and get along with various children, usually cooperative and self-confident.                                                                                          |
| <b>Responsibility and respect</b>            | Respect for others and for property, follow rules and take care of materials, accept responsibility for actions, and show self-control.                                                         |
| <b>Approaches to learning</b>                | Can work neatly, independently, and solve problems, follow instructions and class routines, easily adjust to changes.                                                                           |
| <b>Readiness to explore new things</b>       | Curious about the surrounding world, and eager to explore new books, toys and games.                                                                                                            |
| <b>EMOTIONAL MATURITY</b>                    |                                                                                                                                                                                                 |
| <b>Pro-social and helping behaviour</b>      | Helping someone hurt, sick or upset, offering to help spontaneously, invite bystanders to join in.                                                                                              |
| <b>Anxious and fearful behaviour</b>         | Seldom or never showing anxious behaviours; happy and able to enjoy school, comfortable being left at school by caregivers.                                                                     |
| <b>Aggressive behaviour</b>                  | Seldom or never showing aggressive behaviours; not using aggression to solve conflict, not having temper tantrums, and not mean to others.                                                      |
| <b>Hyperactivity and inattention</b>         | Not showing hyperactive behaviours; able to concentrate, attend to chosen activities, wait their turn, and usually think before doing.                                                          |
| <b>LANGUAGE &amp; COGNITIVE</b>              |                                                                                                                                                                                                 |
| <b>Basic literacy skills</b>                 | Have basic literacy skills: can handle a book, identify some letters and attach sounds to some letters, show awareness of rhyming words, know the writing directions, and write their own name. |
| <b>Interest literacy/numeracy and memory</b> | Showing interest in books and reading, math and numbers, and no difficulty remembering things.                                                                                                  |
| <b>Advanced literacy skills</b>              | Can read simple, complex words or sentences, write voluntarily, write simple words or sentences.                                                                                                |
| <b>Basic numeracy skills</b>                 | Can count to 20, recognize shapes and numbers, compare numbers, sort and classify, use one-to-one correspondence, and understand simple time concepts.                                          |
| <b>COMMUNICATION &amp; GENERAL KNOWLEDGE</b> |                                                                                                                                                                                                 |
| <b>Communication and general knowledge</b>   | Can communicate easily and effectively, can participate in story-telling or imaginative play, articulate clearly, show adequate general knowledge, and are proficient in their native language. |

Table 2: Comparison between sample for whom parental data was and was not available

|                                         | Parental<br>n= 865 | No Parental<br>n=378 | Sig   |
|-----------------------------------------|--------------------|----------------------|-------|
| Mean Age - years (SD)                   | 5.38 (.39)         | 5.36 (0.43)          | .405  |
| Female                                  | 46%                | 45%                  | .719  |
| English as a Second Language            | 10%                | 19%                  | <.001 |
| Identified Special needs                | 5%                 | 10%                  | <.001 |
| Member of the Traveller Community       | 2%                 | 6%                   | <.001 |
| <b>Mean EDI scores by domain (SD)</b>   |                    |                      |       |
| Physical health and wellbeing           | 8.8 (1.4)          | 8.1 (2.0)            | <.001 |
| Social competence                       | 8.3 (1.8)          | 7.5 (2.1)            | <.001 |
| Emotional maturity                      | 7.7 (1.6)          | 7.2 (1.7)            | <.001 |
| Language and cognitive development      | 8.8 (1.6)          | 8.0 (2.4)            | <.001 |
| Communication skills and gen knowledge  | 7.5 (2.8)          | 6.2 (3.2)            | <.001 |
| % Vulnerable in 1 or more domain of EDI | 23%                | 41%                  | <.001 |

**Table 3: Factors associated with developmental vulnerability (Univariate analysis)**

|                                                                              | n(%)     | %<br>vulnerable* | OR  | CI           |
|------------------------------------------------------------------------------|----------|------------------|-----|--------------|
| Male                                                                         | 463 (54) | 30%              | 2.2 | (1.6 - 3.1)  |
| English as a second language (ESL)                                           | 85 (10)  | 49%              | 3.8 | (2.4 - 6.1)  |
| Age <5 years                                                                 | 146 (17) | 31%              | 1.6 | (1.1 - 2.4)  |
| Low birth weight (<2500g)                                                    | 49 (6)   | 41%              | 2.5 | (1.4 - 4.5)  |
| Mother primary education only ( <a href="#">ref: University ed</a> )         | 38 (4)   | 37%              | 2.8 | (1.3 - 5.8)  |
| Mother secondary education only ( <a href="#">ref: University ed</a> )       | 297 (34) | 27%              | 1.7 | (1.1 - 2.6)  |
| Four or more hours screen-time per day ( <a href="#">ref: 1 hr or less</a> ) | 128 (15) | 32%              | 2.0 | (1.2 - 3.4)  |
| Never told stories in the past week ( <a href="#">ref: every day</a> )       | 10 (1)   | 50%              | 4.2 | (1.2 - 14.8) |
| Told stories once or twice in past week ( <a href="#">ref: every day</a> )   | 82 (9)   | 32%              | 1.9 | (1.2 - 3.3)  |
| No preschool                                                                 | 44 (5)   | 43%              | 2.7 | (1.4 - 5.0)  |

\*Refers to the % of children vulnerable in one or more of the five domains of the EDI

**Table 4: Logistic Regression predicting likelihood of vulnerability on EDI Scores**

|                                              | OR (95% CI)*     | OR (95% CI)**    |
|----------------------------------------------|------------------|------------------|
| Male                                         | 2.5 (1.8 - 3.6)  | 2.7 (1.8 - 3.9)  |
| ESL                                          | 4.3 (2.6 - 6.9)  | 4.5 (2.6 - 7.8)  |
| Age <5 years                                 | 1.4 (0.9 - 2.2)  | 1.3 (0.8 - 2.0)  |
| Low Birth Weight                             | 2.6 (1.4 - 4.9)  | 2.6 (1.3 - 5.0)  |
| Mother Education (ref: University education) |                  |                  |
| Primary or less                              | 3.1 (1.4 - 6.7)  | 2.5 (1.0 - 6.0)  |
| Secondary                                    | 2.1 (1.3 - 3.3)  | 2.1 (1.3 - 3.4)  |
| Diploma                                      | 1.5 (0.9 - 2.3)  | 1.5 (0.9 - 2.4)  |
| Daily Screen time (ref: 1 hour or less)      |                  |                  |
| 2 to 3 hours                                 | 1.2 (0.8 - 1.8)  | 1.0 (0.6 - 1.6)  |
| 4 or more hours                              | 1.7 (1.0 - 3.0)  | 1.2 (0.6 - 2.1)  |
| Stories in the past week (ref: every day)    |                  |                  |
| Never                                        | 3.9 (1.0 - 14.3) | 5.3 (1.3 - 21.1) |
| Once or twice                                | 1.7 (1.0 - 2.9)  | 1.4 (0.8 - 2.5)  |
| Many times                                   | 1.2 (0.8 - 1.7)  | 1.1 (0.7 - 1.6)  |
| No Pre-school                                | 1.9 (1.0 - 3.8)  | 1.5 (0.7 - 3.1)  |

\* Adjusted for Age, gender and ESL (separate tests run for each subsequent variable)

\*\* Adjusted for all other variables in one model

**Table 5: PAF for vulnerability based on OR adjusted for all other variables**

|                                   | N (%)    | OR (95% CI)**    | PAF (95% CI)        |
|-----------------------------------|----------|------------------|---------------------|
| Under five                        | 146 (17) | 1.3 (0.8 - 2.0)  | 3.0 (-2.8 - 8.5)    |
| Male                              | 463 (54) | 2.7 (1.8 - 3.9)  | 34.6 (21.3 - 45.7)  |
| ESL                               | 85 (10)  | 4.5 (2.6 - 7.8)  | 12.2 (7.3 - 16.8)   |
| Low Birth Weight                  | 49 (6)   | 2.6 (1.3 - 5.0)  | 4.5 (1.0 - 8.0)     |
| Mother Education: Primary or less | 38 (4)   | 2.5 (1.0 - 6.0)  | 2.8 (-0.2 - 5.7)    |
| Secondary                         | 297 (34) | 2.1 (1.3 - 3.4)  | 16.8 (5.9 - 26.5)   |
| Diploma                           | 263 (30) | 1.5 (0.9 - 2.4)  | 7.7 (-1.8 - 16.3)   |
| Daily Screen time: 2 to 3 hours   | 532 (61) | 1.0 (0.6 - 1.6)  | -0.3 (-21.7 - 17.3) |
| 4 or more hours                   | 128 (15) | 1.2 (0.6 - 2.1)  | 1.6 (-5.2 - 7.9)    |
| Stories in the past week: Never   | 10 (1)   | 5.3 (1.3 - 21.1) | 1.7 (0.1 - 3.3)     |
| Once or twice                     | 82 (9)   | 1.4 (0.8 - 2.5)  | 2.6 (-2.1 - 7.0)    |
| Many times                        | 251 (29) | 1.1 (0.7 - 1.6)  | 1.7 (-6.8 - 9.5)    |
| No Pre-school                     | 44 (5)   | 1.5 (0.7 - 3.1)  | 1.8 (-1.6 - 5.1)    |
| <b>Total PAF</b>                  |          |                  | <b>90.7</b>         |

\*\* Adjusted for all other variables

**Funding:** This work was supported by the Health Research Board in Ireland under grant number PHD/2007/16

No competing interests exist

**Ethical approval** for this study was obtained from the Clinical Research Ethics Committee of the Cork Teaching Hospitals, Cork, Ireland.

## REFERENCES

1. Kershaw P, Forer B. Selection of area-level variables from administrative data: an intersectional approach to the study of place and child development. *Health Place* 2010;16(3):500-11.
2. Marmot M, Allen J, Goldblatt P, Boyce T, McNeish D, Grady M, et al. 'Fair Society Health Lives', The Marmot Review. In: England SRoHli, editor. London, 2010.
3. Power C, Elliott J. Cohort profile: 1958 British birth cohort (National Child Development Study). *International Journal of Epidemiology* 2006;35(1):34-41.
4. Lemelin J-P, Boivin M, Forget-Dubois N, Dionne G, Brendgen M, Séguin JR, et al. The Genetic-Environmental Etiology of Cognitive School Readiness and Later Academic Achievement in Early Childhood. *Child Development* 2007;78(6):1855-69.
5. Nicholson JM, Lucas N, Berthelsen D, Wake M. Socioeconomic inequality profiles in physical and developmental health from 0-7 years: Australian National Study. *Journal of Epidemiology & Community Health* 2012;66(1):81-87.
6. Leventhal T, Brooks-Gunn J. The Neighborhoods They Live in: The Effects of Neighborhood Residence on Child and Adolescent Outcomes. *Psychological Review* 2000;126(2):309 - 37.
7. Heckman JJ, Masterov DV. The Productivity Argument for Investing in Young Children. *Applied Economic Perspectives and Policy* 2007;29(3):446-93.
8. Kershaw P, Warburton B, Anderson L, Hertzman C, Irwin LG, Forer B. The economic costs of early vulnerability in Canada. *Can J Public Health* 2010;101 Suppl 3:S8-12.
9. Maggi S, Roberts W, MacLennan D, D'Angiulli A. Community resilience, quality childcare, and preschoolers' mental health: A three-city comparison. *Social Science & Medicine*; In Press, Accepted Manuscript.
10. Furumoto-Dawson A, Gehlert S, Sohmer D, Olopade O, Sacks T. Early-life conditions and mechanisms of population health vulnerabilities. *Health Aff (Millwood)* 2007;26(5):1238-48.
11. Guhn M, Janus M, Hertzman C. The Early Development Instrument: Translating school readiness assessment into community actions and policy planning. *Early Education and Development* 2007;18(3):369-74.
12. Rose G. Sick Individuals and Sick Populations. *International Journal of Epidemiology* 1985;14:32 - 38.
13. Guhn M, Gadermann A, Zumbo BD. Does the EDI measure school readiness in the same way across different groups of children? *Early Education and Development* 2007;18(3):453-72.
14. Avan BI, Kirkwood B. Review of the theoretical frameworks for the study of child development within public health and epidemiology. *Journal of Epidemiology and Community Health* 2010;64:388 - 93.
15. Janus M, Brinkman S, Duku E. Validity and Psychometric Properties of the Early Development Instrument in Canada, Australia, United States, and Jamaica. *Social Indicators Research* 2011;103(2):283-97.

16. Brinkman S, Gialamas A, Rahman A, Mittinty MN, Gregory TA, Silburn S, et al. Jurisdictional, socioeconomic and gender inequalities in child health and development: analysis of a national census of 5-year-olds in Australia. *BMJ Open* 2012;2(5).
17. C.S.O. Profile 7: Religion, Ethnicity and Irish Travellers. Cork: Central Statistics Office, 2012.
18. Haase T, Pratschke J. Deprivation and its Spatial Articulation in the Republic of Ireland. Dublin: Area Development Management, 2005.
19. OMCYA. State of the Nations Children. Dublin: Office of the Minister for Children and Youth Affairs, 2010.
20. Janus M, Brinkman S, Duku E, Hertzman C, Santos R, Sayers M, et al. The Early Development Instrument: A Population-based Measure for Communities. Hamilton, Ontario: Offord Centre for Child Studies, McMaster University, 2007.
21. Janus M, Offord DR. Development and Psychometric Properties of the Early Development Instrument (EDI): A Measure of Children's School Readiness. *Canadian Journal of Behavioural Science-Revue Canadienne Des Sciences Du Comportement* 2007;39(1):1-22.
22. D'Angiulli A, Warburton W, Dahinten S, Hertzman C. Population-level associations between preschool vulnerability and grade-four basic skills. *PLoS One* 2009;4(11):e7692.
23. Brinkman S, Silburn S, Lawrence D, Goldfeld S, Sayers M, Oberklaid F. Investigating the validity of the Australian Early Development Index. *Early Education and Development* 2007;18(3):427-51.
24. Muhajarine N, Puchala C, Janus M. Does the EDI Equivalently Measure Facets of School Readiness for Aboriginal and Non-Aboriginal children? *Social Indicators Research* 2011;103(2):299-314.
25. Williams J, Greene S, Doyle E, Harris E, Layte R, McCoy S, et al. Growing up in Ireland national longitudinal study of children. The lives of 9 year olds: The Stationery Office, 2009.
26. Morgan K, McGee H, Watson D, Perry I, Barry M, Shelley E, et al. SLAN 2007: Survey of Lifestyle, Attitudes & Nutrition in Ireland: Main Report. Dublin: Department of Health and Children, 2008.
27. Brinkman S, Sayers M, Goldfeld S, Kline J. Population monitoring of language and cognitive development in Australia: the Australian Early Development Index. *International Journal of Speech-Language Pathology* 2009;11(5):419-30.
28. Carey DJ. *The Essential Guide to Special Education in Ireland*. Dublin: Primary ABC, 2005.
29. O'Sullivan JJ, Pearce MS, Parker L. Parental recall of birth weight: how accurate is it? *Archives of Disease in Childhood* 2000;82(3):202-03.
30. Hanley JA. A heuristic approach to the formulas for population attributable fraction. *Journal of Epidemiology and Community Health* 2001;55(7):508-14.
31. Miettinen OS. Proportion of disease caused or prevented by a given exposure, trait or intervention. *American Journal of Epidemiology* 1974(99):325 - 32.
32. Greenland S, Drescher K. Maximum likelihood estimation of the attributable fraction from logistic models. *Biometrics* 1993;49:865-72.
33. Carpiano RM, Lloyd JEV, Hertzman C. Concentrated affluence, concentrated disadvantage, and children's readiness for school: A population-based, multi-level investigation. *Social Science & Medicine* 2009;69(3):420-32.
34. Janus M, Duku E. The School Entry Gap: Socioeconomic, Family, and Health Factors Associated With Children's School Readiness to Learn. *Early Education and Development* 2007;18(3):375-403.
35. Kohen D, Oliver L, Pierre F. Examining the effects of schools and neighbourhoods on the outcomes of Kindergarten children in Canada. *International Journal of Speech-Language Pathology* 2009;11(5):404-18.
36. Bus AG, Van Ijzendoorn MH. Mothers Reading to Their 3-Year-Olds: The Role of Mother-Child Attachment Security in Becoming Literate. *Reading Research Quarterly* 1995;30(4):998-1015.

- 1  
2  
3 37. Fletcher KL, Reese E. Picture book reading with young children: A conceptual framework.  
4 *Developmental Review* 2005;25(1):64-103.
- 5 38. Janus M. Transition to school. In: Laverick DM, Jalongo MR, editors. *Transitions to early care and*  
6 *education*: Springer Netherlands, 2011:177 - 87.
- 7 39. Abdalla S, Cronin F, Daly L, Drummond A, Fitzpatrick P, Frazier K, et al. Our Geels: All Ireland  
8 Traveller Health Study. Dublin, 2010:University College Dublin.
- 9 40. Maggi S, Irwin LJ, Siddiqi A, Hertzman C. The social determinants of early child development: an  
10 overview. *J Paediatr Child Health* 2010;46(11):627-35.
- 11 41. Hertzman C. The state of child development in Canada: Are we moving toward, or away from,  
12 equity from the start? *Paediatr Child Health* 2009;14(10):673-6.
- 13 42. Banks J, McCoy S. A Study on the Prevalence of Special Educational Needs. Dublin: Economic and  
14 Social Research Institute, 2011.
- 15 43. Programme for Government 2011 - 2016. In: Expenditure DoP, editor. Dublin, 2011.
- 16 44. Lynch JW, Law C, Brinkman S, Chittleborough C, Sawyer M. Inequalities in child healthy  
17 development: Some challenges for effective implementation. *Social Science & Medicine*  
18 2010;71(7):1244-48.
- 19 45. Hertzman C, Williams R. Making early childhood count. *Canadian Medical Association Journal*  
20 2009;180(1):68-71.  
21  
22  
23  
24  
25  
26  
27  
28  
29  
30  
31  
32  
33  
34  
35  
36  
37  
38  
39  
40  
41  
42  
43  
44  
45  
46  
47  
48  
49  
50  
51  
52  
53  
54  
55  
56  
57  
58  
59  
60



Figure 1: Participant flow chart

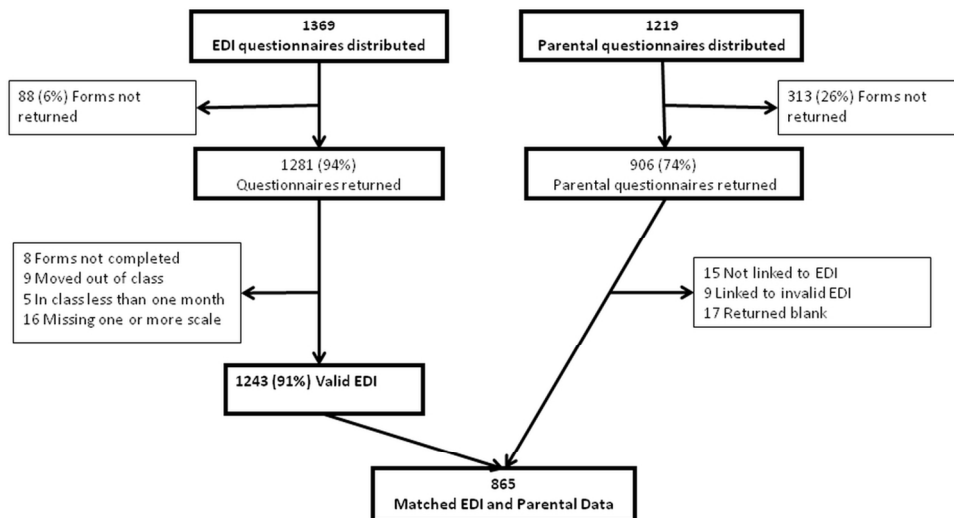

119x90mm (300 x 300 DPI)

Review only

1  
2  
3  
4  
5  
6  
7  
8  
9  
10  
11  
12  
13  
14  
15  
16  
17  
18  
19  
20  
21  
22  
23  
24  
25  
26  
27  
28  
29  
30  
31  
32  
33  
34  
35  
36  
37  
38  
39  
40  
41  
42  
43  
44  
45  
46  
47  
48  
49  
50  
51  
52  
53  
54  
55  
56  
57  
58  
59  
60

Figure 2: Distribution of scores across all five domains of development

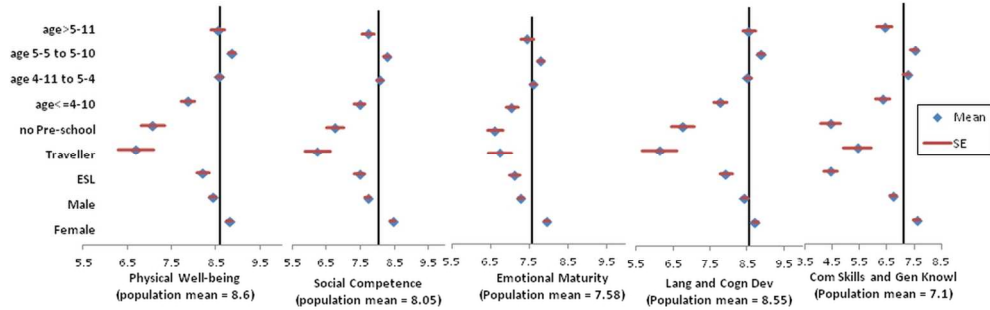

\*Each vertical axis represents the population mean for that domain

119x90mm (300 x 300 DPI)

View only

|  |  |  |  |  |  |  |  |
|--|--|--|--|--|--|--|--|
|  |  |  |  |  |  |  |  |
|--|--|--|--|--|--|--|--|

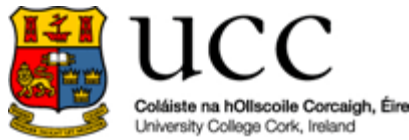

# Junior Infants Parent Survey Cork 2010 - 11

Please fill in the circles like this ● or ⊗. Whenever you are asked about “your child”, please answer the question based on your child in Junior Infants.

## SECTION A: CHILD HEALTH & DEVELOPMENT

1. Is your child male or female?  Male  Female
2. When was your child born? \_\_\_\_\_ day \_\_\_\_\_ month \_\_\_\_\_ year
3. What was your child's weight at birth? \_\_\_\_\_ lbs \_\_\_\_\_ oz or \_\_\_\_\_ grams
4. Does your family have a regular family doctor or health care provider that you can talk to about your child's health?  Yes  No
5. In general, would you say your child's health is:  Excellent  Very Good  Good  Fair  Poor
6. Do you feel your child has a special need that is not yet recognized by the school?  Yes  No

| 7. In a typical WEEK, how often does your child                                                                                                                             | Always                | Most of the time      | Sometimes             | Never                 |
|-----------------------------------------------------------------------------------------------------------------------------------------------------------------------------|-----------------------|-----------------------|-----------------------|-----------------------|
| a. Eat breakfast?                                                                                                                                                           | <input type="radio"/> | <input type="radio"/> | <input type="radio"/> | <input type="radio"/> |
| b. Eat at least 4 servings of vegetables and/or fruits each day?                                                                                                            | <input type="radio"/> | <input type="radio"/> | <input type="radio"/> | <input type="radio"/> |
| c. Eat or drink 2 servings of milk products ( <i>white or chocolate milk, cheese, yogurt, milk puddings or milk substitutes such as fortified soy beverages</i> ) each day? | <input type="radio"/> | <input type="radio"/> | <input type="radio"/> | <input type="radio"/> |
| d. Eat meals together with the family?                                                                                                                                      | <input type="radio"/> | <input type="radio"/> | <input type="radio"/> | <input type="radio"/> |

Please fill in the circles like this ● or ⊗.

## SECTION B: EARLY YEARS EXPERIENCES

| 8. In the years before your child started Junior Infants how often did your child attend:    | Once a Week or more   | Once a Month          | 3 or 4 Times a Year   | Once a Year           | Not at All            |
|----------------------------------------------------------------------------------------------|-----------------------|-----------------------|-----------------------|-----------------------|-----------------------|
| a. Play-based children's programmes (e.g. drop-ins, Parent and Toddler Group, Family Centre) | <input type="radio"/> |
| b. Literacy and family reading programs (e.g. story times, etc)                              | <input type="radio"/> |
| c. Children's Club (Beavers, Ladybirds, Boys and Girls Club)                                 | <input type="radio"/> |
| d. Music, Arts or Dance programmes                                                           | <input type="radio"/> |
| e. Visited a public library                                                                  | <input type="radio"/> |
| f. Visited a book shop                                                                       | <input type="radio"/> |
| g. Cultural/language/ethnic programmes                                                       | <input type="radio"/> |

| 9. In the years before your child started Junior Infants, did your child get help from any of the following services: | Yes                   | No                    | On waiting list for assessment | On waiting list for services |
|-----------------------------------------------------------------------------------------------------------------------|-----------------------|-----------------------|--------------------------------|------------------------------|
| a. Speech and Language Services                                                                                       | <input type="radio"/> | <input type="radio"/> | <input type="radio"/>          | <input type="radio"/>        |
| b. Blind or Low Vision Services                                                                                       | <input type="radio"/> | <input type="radio"/> | <input type="radio"/>          | <input type="radio"/>        |
| c. Occupational or Physical Therapy                                                                                   | <input type="radio"/> | <input type="radio"/> | <input type="radio"/>          | <input type="radio"/>        |
| d. Hearing Services                                                                                                   | <input type="radio"/> | <input type="radio"/> | <input type="radio"/>          | <input type="radio"/>        |
| e. Programmes / Services for Behavioural Issues                                                                       | <input type="radio"/> | <input type="radio"/> | <input type="radio"/>          | <input type="radio"/>        |
| f. Programmes / Services for Developmental Issues                                                                     | <input type="radio"/> | <input type="radio"/> | <input type="radio"/>          | <input type="radio"/>        |
| g. Mental Health Programmes / Services                                                                                | <input type="radio"/> | <input type="radio"/> | <input type="radio"/>          | <input type="radio"/>        |
| h. Programs / Services for English as a Second Language                                                               | <input type="radio"/> | <input type="radio"/> | <input type="radio"/>          | <input type="radio"/>        |

| 10. In the years before your child started Junior Infants, were you unable to access services to help your child because of any of the following reasons: | YES                   | NO                    |
|-----------------------------------------------------------------------------------------------------------------------------------------------------------|-----------------------|-----------------------|
| a. Wait list was too long                                                                                                                                 | <input type="radio"/> | <input type="radio"/> |
| b. Cost was too much                                                                                                                                      | <input type="radio"/> | <input type="radio"/> |
| c. Didn't have information about services                                                                                                                 | <input type="radio"/> | <input type="radio"/> |
| d. Didn't know services were available                                                                                                                    | <input type="radio"/> | <input type="radio"/> |
| e. No services near where I live                                                                                                                          | <input type="radio"/> | <input type="radio"/> |
| f. No way to get there (no car, no buses, cost)                                                                                                           | <input type="radio"/> | <input type="radio"/> |
| h. Times did not work for me                                                                                                                              | <input type="radio"/> | <input type="radio"/> |
| i. Services were not available in my language                                                                                                             | <input type="radio"/> | <input type="radio"/> |
| j. Other, please tell us: _____                                                                                                                           | <input type="radio"/> | <input type="radio"/> |

Please fill in the circles like this ● or ⊗.

## SECTION C: CHILD CARE

For the next few questions, we are asking about the MAIN type of child care you used. You may have used more than one type of child care but select the one that you consider to be your main child care provider. Do not include babysitters you used occasionally. Do not include pre-school.

11. For EACH age period, what was your MAIN type of care? Please give one answer for each age. If your child was NOT in regular child care during a certain age period, please use the answer Parent Care Only.

| Age of Child                                         | Parent Care Only      | Unpaid care (eg. relative or friend) | Paid care in your home | Paid care in someone's home | Care in a centre / crèche |
|------------------------------------------------------|-----------------------|--------------------------------------|------------------------|-----------------------------|---------------------------|
| 0 to 12 months (infant care)                         | <input type="radio"/> | <input type="radio"/>                | <input type="radio"/>  | <input type="radio"/>       | <input type="radio"/>     |
| 1 yr up to 1 yr and 6 months (1.5 yrs) (infant care) | <input type="radio"/> | <input type="radio"/>                | <input type="radio"/>  | <input type="radio"/>       | <input type="radio"/>     |
| 1.5 years up to 2.5 years (toddler care)             | <input type="radio"/> | <input type="radio"/>                | <input type="radio"/>  | <input type="radio"/>       | <input type="radio"/>     |
| 2.5 yrs up to 4 yrs (preschooler care)               | <input type="radio"/> | <input type="radio"/>                | <input type="radio"/>  | <input type="radio"/>       | <input type="radio"/>     |
| 4 yrs up to 6 yrs (school age care)                  | <input type="radio"/> | <input type="radio"/>                | <input type="radio"/>  | <input type="radio"/>       | <input type="radio"/>     |

12. On average, how many hours per week IN TOTAL did your child spend in your MAIN child care? If your child was NOT in regular child care during a certain age period, please use the answer None - Parent Care Only.

| Age of Child                                         | None - Parent Care Only | Less than 20 hours per week | 20 - 30 hours per week | 31 - 40 hours per week | More than 40 hours per week |
|------------------------------------------------------|-------------------------|-----------------------------|------------------------|------------------------|-----------------------------|
| 0 to 12 months (infant care)                         | <input type="radio"/>   | <input type="radio"/>       | <input type="radio"/>  | <input type="radio"/>  | <input type="radio"/>       |
| 1 yr up to 1 yr and 6 months (1.5 yrs) (infant care) | <input type="radio"/>   | <input type="radio"/>       | <input type="radio"/>  | <input type="radio"/>  | <input type="radio"/>       |
| 1.5 years up to 2.5 years (toddler care)             | <input type="radio"/>   | <input type="radio"/>       | <input type="radio"/>  | <input type="radio"/>  | <input type="radio"/>       |
| 2.5 yrs up to 4 yrs (preschooler care)               | <input type="radio"/>   | <input type="radio"/>       | <input type="radio"/>  | <input type="radio"/>  | <input type="radio"/>       |
| 4 yrs up to 6 yrs (school age care)                  | <input type="radio"/>   | <input type="radio"/>       | <input type="radio"/>  | <input type="radio"/>  | <input type="radio"/>       |

Please fill in the circles like this ● or ⊗.

## SECTION D: PRE-SCHOOL AND SCHOOL

|                                                                             | Yes                   | No                    |
|-----------------------------------------------------------------------------|-----------------------|-----------------------|
| 13. In the year before starting school, did your child attend a pre-school? | <input type="radio"/> | <input type="radio"/> |
| 13. a. If yes, where _____                                                  |                       |                       |

| 14. We would like to know more about your family's experience with the Junior Infants. | Strongly Disagree     | Disagree              | Agree                 | Strongly Agree        |
|----------------------------------------------------------------------------------------|-----------------------|-----------------------|-----------------------|-----------------------|
| a. My child is excited about learning                                                  | <input type="radio"/> | <input type="radio"/> | <input type="radio"/> | <input type="radio"/> |
| b. As a parent, I feel welcome in my child's school                                    | <input type="radio"/> | <input type="radio"/> | <input type="radio"/> | <input type="radio"/> |
| c. My child is able to manage the school day.                                          | <input type="radio"/> | <input type="radio"/> | <input type="radio"/> | <input type="radio"/> |

| 15. Since the beginning of this school year, have you:                                               | Never                 | Once or Twice         | Three or More Times   |
|------------------------------------------------------------------------------------------------------|-----------------------|-----------------------|-----------------------|
| a. Attended a parent-teacher meeting?                                                                | <input type="radio"/> | <input type="radio"/> | <input type="radio"/> |
| b. Attended a general school meeting (e.g. open meeting, parents council meeting)                    | <input type="radio"/> | <input type="radio"/> | <input type="radio"/> |
| c. Attended a school or class event (e.g. school play or concert)                                    | <input type="radio"/> | <input type="radio"/> | <input type="radio"/> |
| d. Volunteered in the school? (e.g. helped in the library, helped with a fundraiser or school event) | <input type="radio"/> | <input type="radio"/> | <input type="radio"/> |

## SECTION E: YOU AND YOUR CHILD

| 16. In the PAST 7 DAYS, have you or someone close to your child done the following things with your child?                 | Yes, Everyday         | Yes, Many Times       | Yes, Once or Twice    | No                    |
|----------------------------------------------------------------------------------------------------------------------------|-----------------------|-----------------------|-----------------------|-----------------------|
| a. Played simple maths games (cards, counting, puzzles, board games)                                                       | <input type="radio"/> | <input type="radio"/> | <input type="radio"/> | <input type="radio"/> |
| b. Sang songs or said rhymes                                                                                               | <input type="radio"/> | <input type="radio"/> | <input type="radio"/> | <input type="radio"/> |
| c. Told or read him/her a story                                                                                            | <input type="radio"/> | <input type="radio"/> | <input type="radio"/> | <input type="radio"/> |
| d. Worked on arts, crafts or drawing with him/her                                                                          | <input type="radio"/> | <input type="radio"/> | <input type="radio"/> | <input type="radio"/> |
| e. Worked on the sounds of letters                                                                                         | <input type="radio"/> | <input type="radio"/> | <input type="radio"/> | <input type="radio"/> |
| f. Helped with printing letters, numbers or child's name                                                                   | <input type="radio"/> | <input type="radio"/> | <input type="radio"/> | <input type="radio"/> |
| g. Done household chores together like cooking, cleaning, putting away toys, setting the table, caring for pets, gardening | <input type="radio"/> | <input type="radio"/> | <input type="radio"/> | <input type="radio"/> |

Please fill in the circles like this ● or ⊗.

|                                                                                                              |                       |                       |
|--------------------------------------------------------------------------------------------------------------|-----------------------|-----------------------|
| 17. Have you ever attended a class, workshop, programme or event meant to help you in your role as a parent? | Yes                   | No                    |
|                                                                                                              | <input type="radio"/> | <input type="radio"/> |

| 18. In the past 12 months, how often has your child:                                                                   | Once a Week or more   | Once a Month          | 3 or 4 Times a Year   | Once a Year           | Not at All            |
|------------------------------------------------------------------------------------------------------------------------|-----------------------|-----------------------|-----------------------|-----------------------|-----------------------|
| a. Played a sport WITH a coach or instructor, outside of school activities (e.g., swimming lessons, GAA, hockey, etc.) | <input type="radio"/> |
| b. Played a sport or done physical activities WITHOUT a coach or instructor (e.g. cycling, skate-boarding, etc.)       | <input type="radio"/> |

|                                                                                                                     |                         |                       |                       |                       |                       |
|---------------------------------------------------------------------------------------------------------------------|-------------------------|-----------------------|-----------------------|-----------------------|-----------------------|
| 19. In a typical school day, how many hours does your child watch TV, use the computer or play video games at home? | 5 or more hours per day | 4 hours per day       | 3 hours per day       | 2 hours per day       | One Hour or less      |
|                                                                                                                     | <input type="radio"/>   | <input type="radio"/> | <input type="radio"/> | <input type="radio"/> | <input type="radio"/> |

|                                                                             |                       |                       |                       |                       |                       |
|-----------------------------------------------------------------------------|-----------------------|-----------------------|-----------------------|-----------------------|-----------------------|
| 20. On a typical school night, how many hours of sleep does your child get? | Less than 8 hours     | 8 to 10 hours         | 11 to 12 hours        | 13 to 14 hours        | More than 14 hours    |
|                                                                             | <input type="radio"/> |

## SECTION 6: YOUR COMMUNITY

| 21. Please tell us about your neighbourhood.                                                                   | True                  | Sometimes True        | Not True              |
|----------------------------------------------------------------------------------------------------------------|-----------------------|-----------------------|-----------------------|
| a. It is safe to walk alone in my neighbourhood after dark.                                                    | <input type="radio"/> | <input type="radio"/> | <input type="radio"/> |
| b. It is safe for children to play outside during the day in my neighbourhood.                                 | <input type="radio"/> | <input type="radio"/> | <input type="radio"/> |
| c. There are safe parks, playgrounds and play spaces in my neighbourhood.                                      | <input type="radio"/> | <input type="radio"/> | <input type="radio"/> |
| d. If there is a problem around here, the neighbours get together and deal with it.                            | <input type="radio"/> | <input type="radio"/> | <input type="radio"/> |
| e. There are adults in my neighbourhood that children can look up to.                                          | <input type="radio"/> | <input type="radio"/> | <input type="radio"/> |
| f. People around here are willing to help their neighbours.                                                    | <input type="radio"/> | <input type="radio"/> | <input type="radio"/> |
| g. You can count on adults in my neighbourhood to watch out that children are safe and don't get into trouble. | <input type="radio"/> | <input type="radio"/> | <input type="radio"/> |
| h. When I'm away from home, I know that my neighbours will keep their eyes open for possible trouble.          | <input type="radio"/> | <input type="radio"/> | <input type="radio"/> |

Please fill in the circles like this ● or ⊗.

| 22. Do you have access to the following places in your community? Access might mean walking, driving your car a short distance or taking the bus. | Yes                   | No                    | Don't know            |
|---------------------------------------------------------------------------------------------------------------------------------------------------|-----------------------|-----------------------|-----------------------|
| a. Public park or sports grounds                                                                                                                  | <input type="radio"/> | <input type="radio"/> | <input type="radio"/> |
| b. Library                                                                                                                                        | <input type="radio"/> | <input type="radio"/> | <input type="radio"/> |
| c. Shopping centre                                                                                                                                | <input type="radio"/> | <input type="radio"/> | <input type="radio"/> |
| d. Community centre                                                                                                                               | <input type="radio"/> | <input type="radio"/> | <input type="radio"/> |
| e. School                                                                                                                                         | <input type="radio"/> | <input type="radio"/> | <input type="radio"/> |
| f. Grocery store                                                                                                                                  | <input type="radio"/> | <input type="radio"/> | <input type="radio"/> |

| 23. Do you regularly join in the activities of any of the following types of organisation?                                                 | Yes                   | No                    |
|--------------------------------------------------------------------------------------------------------------------------------------------|-----------------------|-----------------------|
| a. Sports clubs (Parish, GAA, Golf, Other), gym, exercise classes                                                                          | <input type="radio"/> | <input type="radio"/> |
| b. Political parties, trade unions, environmental groups                                                                                   | <input type="radio"/> | <input type="radio"/> |
| c. Parent-teacher associations, tenants groups, residents groups, neighbourhood watch, youth groups, other community action groups         | <input type="radio"/> | <input type="radio"/> |
| d. Church or other religious/parish groups, charitable or voluntary organisations (e.g. collecting for charity, helping the sick, elderly) | <input type="radio"/> | <input type="radio"/> |
| e. Evening classes, arts or music groups, education activities                                                                             | <input type="radio"/> | <input type="radio"/> |
| f. Social clubs (e.g. mother & toddler group, club, women's groups, elderly group)                                                         | <input type="radio"/> | <input type="radio"/> |
| g. Other, please tell us: _____                                                                                                            | <input type="radio"/> | <input type="radio"/> |

| 24. How many people are so close to you that can count on them if you have serious personal problems? |                       |                       |                       |  |
|-------------------------------------------------------------------------------------------------------|-----------------------|-----------------------|-----------------------|--|
| None                                                                                                  | 1 or 2                | 3 to 5                | More than 5           |  |
| <input type="radio"/>                                                                                 | <input type="radio"/> | <input type="radio"/> | <input type="radio"/> |  |

| 25. How much friendly interest do people in your neighbourhood take in what you are doing? |                       |                       |                       |                       |
|--------------------------------------------------------------------------------------------|-----------------------|-----------------------|-----------------------|-----------------------|
| A lot                                                                                      | Some                  | Uncertain             | Little                | None                  |
| <input type="radio"/>                                                                      | <input type="radio"/> | <input type="radio"/> | <input type="radio"/> | <input type="radio"/> |

| 26. How easy is it to get practical help from neighbours if you should need it? |                       |                       |                       |                       |
|---------------------------------------------------------------------------------|-----------------------|-----------------------|-----------------------|-----------------------|
| Very easy                                                                       | Easy                  | Possible              | Difficult             | Very Difficult        |
| <input type="radio"/>                                                           | <input type="radio"/> | <input type="radio"/> | <input type="radio"/> | <input type="radio"/> |



Please fill in the circles like this ● or ⊗.

27. Can you tell me how much you agree or disagree with this statement: "If I was experiencing mental health problems I wouldn't want people knowing about it"

|                       |                       |                            |                       |                       |
|-----------------------|-----------------------|----------------------------|-----------------------|-----------------------|
| Agree strongly        | Agree slightly        | Neither agree nor disagree | Disagree slightly     | Disagree strongly     |
| <input type="radio"/> | <input type="radio"/> | <input type="radio"/>      | <input type="radio"/> | <input type="radio"/> |

## SECTION H: BACKGROUND INFORMATION

To help us understand the families who are participating in this study, we would like to ask a few questions about yourself, your family and your household.

|                          |                                    |                                    |                                          |
|--------------------------|------------------------------------|------------------------------------|------------------------------------------|
|                          | Mother                             | Father                             | Other (please tell us)                   |
| 28. Are you the child's: | <input type="radio"/> <sub>1</sub> | <input type="radio"/> <sub>2</sub> | <input type="radio"/> <sub>3</sub> _____ |

| 29. Please tell us if your household has had the following items and if not, is it because you couldn't afford it or for another reason. | Yes                   | No, Cannot afford     | No, other reason      |
|------------------------------------------------------------------------------------------------------------------------------------------|-----------------------|-----------------------|-----------------------|
| a. Does your household eat meals with meat, chicken, fish (or vegetarian equivalent) at least every second day?                          | <input type="radio"/> | <input type="radio"/> | <input type="radio"/> |
| b. Does your household have a roast joint (or its equivalent) at least once a week?                                                      | <input type="radio"/> | <input type="radio"/> | <input type="radio"/> |
| c. Do household members buy new rather than second-hand clothes?                                                                         | <input type="radio"/> | <input type="radio"/> | <input type="radio"/> |
| d. Does each household member possess a warm waterproof coat?                                                                            | <input type="radio"/> | <input type="radio"/> | <input type="radio"/> |
| e. Does each household member possess two pairs of strong shoes?                                                                         | <input type="radio"/> | <input type="radio"/> | <input type="radio"/> |
| f. Does the household replace any worn out furniture?                                                                                    | <input type="radio"/> | <input type="radio"/> | <input type="radio"/> |
| g. Does the household keep the home adequately warm?                                                                                     | <input type="radio"/> | <input type="radio"/> | <input type="radio"/> |
| h. Does the household have family or friends for a drink or meal once a month?                                                           | <input type="radio"/> | <input type="radio"/> | <input type="radio"/> |
| i. Does the household buy presents for family or friends at least once a year?                                                           | <input type="radio"/> | <input type="radio"/> | <input type="radio"/> |

Please fill in the circles like this ● or ⊗.

30. With how much difficulty or ease does your family make ends meet?

With great  
difficulty

With difficulty

With some  
difficulty

Fairly easily

Easily

Very easily

31. Think back to when you were 16 years old, with how much difficulty or ease did your family at the time make ends meet?

With great  
difficulty

With difficulty

With some  
difficulty

Fairly easily

Easily

Very easily

32. Do you live in a

House

Apartment/ flat / bedsit

Other, tell us \_\_\_\_\_

33. Which of the following best describes your home?

Owner occupied (with or without a mortgage)

Being purchased from a Local Authority under a Tenant Purchase Scheme

Rented from a Local Authority

Rented from a Voluntary Body

Rented from a Private Landlord

Living with and paying rent to your or your partner's parent(s)

Occupied free of rent with your or your partner's parent(s)

Occupied free of rent from your or your partner's job

34. What language do YOU speak most often at home?







35. What language does YOUR CHILD speak most often at home?

Please fill in the circles like this ● or ⊗.

| 36. Which of the following best describes your family? | One Parent            | Two Parent            | Other (please tell us)      |
|--------------------------------------------------------|-----------------------|-----------------------|-----------------------------|
|                                                        | <input type="radio"/> | <input type="radio"/> | <input type="radio"/> _____ |

36.(a) What is the child's mothers occupation? \_\_\_\_\_

(b) How many hours per week does she work? \_\_\_\_\_

37. (a) What is the child's father's occupation? \_\_\_\_\_

(b) How many hours per week does he work? \_\_\_\_\_

38. What is the mother's highest level of education? Please fill in one answer.

Primary or less <sub>1</sub>

Intermediate/ Junior/ Group Certificate or equivalent <sub>2</sub>

Leaving Certificate or equivalent <sub>3</sub>

Diploma / Certificate <sub>4</sub>

University graduate Degree <sub>5</sub>

39. What is the father's highest level of education? Please fill in one answer.

Primary or less <sub>1</sub>

Intermediate/ Junior/ Group Certificate or equivalent <sub>2</sub>

Leaving Certificate or equivalent <sub>3</sub>

Diploma / Certificate <sub>4</sub>

University graduate Degree <sub>5</sub>

**Thank you very much for your participation.**

STROBE 2007 (v4) Statement—Checklist of items that should be included in reports of *cross-sectional studies*

| Section/Topic                | Item # | Recommendation                                                                                                                                                                       | Reported on page # |
|------------------------------|--------|--------------------------------------------------------------------------------------------------------------------------------------------------------------------------------------|--------------------|
| Title and abstract           | 1      | (a) Indicate the study’s design with a commonly used term in the title or the abstract                                                                                               | 1                  |
|                              |        | (b) Provide in the abstract an informative and balanced summary of what was done and what was found                                                                                  | 1                  |
| <b>Introduction</b>          |        |                                                                                                                                                                                      |                    |
| Background/rationale         | 2      | Explain the scientific background and rationale for the investigation being reported                                                                                                 | 1                  |
| Objectives                   | 3      | State specific objectives, including any prespecified hypotheses                                                                                                                     | 1                  |
| <b>Methods</b>               |        |                                                                                                                                                                                      |                    |
| Study design                 | 4      | Present key elements of study design early in the paper                                                                                                                              | 2                  |
| Setting                      | 5      | Describe the setting, locations, and relevant dates, including periods of recruitment, exposure, follow-up, and data collection                                                      | 1                  |
| Participants                 | 6      | (a) Give the eligibility criteria, and the sources and methods of selection of participants                                                                                          | 2                  |
| Variables                    | 7      | Clearly define all outcomes, exposures, predictors, potential confounders, and effect modifiers. Give diagnostic criteria, if applicable                                             | 2 – 3              |
| Data sources/<br>measurement | 8*     | For each variable of interest, give sources of data and details of methods of assessment (measurement). Describe comparability of assessment methods if there is more than one group | 2 -3               |
| Bias                         | 9      | Describe any efforts to address potential sources of bias                                                                                                                            | 3-4                |
| Study size                   | 10     | Explain how the study size was arrived at                                                                                                                                            | 2                  |
| Quantitative variables       | 11     | Explain how quantitative variables were handled in the analyses. If applicable, describe which groupings were chosen and why                                                         | 3                  |
| Statistical methods          | 12     | (a) Describe all statistical methods, including those used to control for confounding                                                                                                | 3                  |
|                              |        | (b) Describe any methods used to examine subgroups and interactions                                                                                                                  | 3-4                |
|                              |        | (c) Explain how missing data were addressed                                                                                                                                          | 3                  |
|                              |        | (d) If applicable, describe analytical methods taking account of sampling strategy                                                                                                   | n/a                |
|                              |        | (e) Describe any sensitivity analyses                                                                                                                                                | n/a                |
| <b>Results</b>               |        |                                                                                                                                                                                      |                    |

1  
2  
3  
4  
5  
6  
7  
8  
9  
10  
11  
12  
13  
14  
15  
16  
17  
18  
19  
20  
21  
22  
23  
24  
25  
26  
27  
28  
29  
30  
31  
32  
33  
34  
35  
36  
37  
38  
39  
40  
41  
42  
43  
44  
45  
46  
47  
48  
49

|                          |     |                                                                                                                                                                                                              |              |
|--------------------------|-----|--------------------------------------------------------------------------------------------------------------------------------------------------------------------------------------------------------------|--------------|
| Participants             | 13* | (a) Report numbers of individuals at each stage of study—eg numbers potentially eligible, examined for eligibility, confirmed eligible, included in the study, completing follow-up, and analysed            | 1-2          |
|                          |     | (b) Give reasons for non-participation at each stage                                                                                                                                                         | 2            |
|                          |     | (c) Consider use of a flow diagram                                                                                                                                                                           | n/a          |
| Descriptive data         | 14* | (a) Give characteristics of study participants (eg demographic, clinical, social) and information on exposures and potential confounders                                                                     | 2            |
|                          |     | (b) Indicate number of participants with missing data for each variable of interest                                                                                                                          | Tables       |
| Outcome data             | 15* | Report numbers of outcome events or summary measures                                                                                                                                                         | 3-4          |
| Main results             | 16  | (a) Give unadjusted estimates and, if applicable, confounder-adjusted estimates and their precision (eg, 95% confidence interval). Make clear which confounders were adjusted for and why they were included | 4 and tables |
|                          |     | (b) Report category boundaries when continuous variables were categorized                                                                                                                                    | 3 and tables |
|                          |     | (c) If relevant, consider translating estimates of relative risk into absolute risk for a meaningful time period                                                                                             | n/a          |
| Other analyses           | 17  | Report other analyses done—eg analyses of subgroups and interactions, and sensitivity analyses                                                                                                               | 4-5          |
| <b>Discussion</b>        |     |                                                                                                                                                                                                              |              |
| Key results              | 18  | Summarise key results with reference to study objectives                                                                                                                                                     | 5-6          |
| Limitations              | 19  | Discuss limitations of the study, taking into account sources of potential bias or imprecision. Discuss both direction and magnitude of any potential bias                                                   | 5-6          |
| Interpretation           | 20  | Give a cautious overall interpretation of results considering objectives, limitations, multiplicity of analyses, results from similar studies, and other relevant evidence                                   | 6            |
| Generalisability         | 21  | Discuss the generalisability (external validity) of the study results                                                                                                                                        | 6            |
| <b>Other information</b> |     |                                                                                                                                                                                                              |              |
| Funding                  | 22  | Give the source of funding and the role of the funders for the present study and, if applicable, for the original study on which the present article is based                                                | 1            |

\*Give information separately for cases and controls in case-control studies and, if applicable, for exposed and unexposed groups in cohort and cross-sectional studies.

**Note:** An Explanation and Elaboration article discusses each checklist item and gives methodological background and published examples of transparent reporting. The STROBE checklist is best used in conjunction with this article (freely available on the Web sites of PLoS Medicine at <http://www.plosmedicine.org/>, Annals of Internal Medicine at <http://www.annals.org/>, and Epidemiology at <http://www.epidem.com/>). Information on the STROBE Initiative is available at [www.strobe-statement.org](http://www.strobe-statement.org).
